# Supplementary material for: Effects of opioids administered via intravenous or epidural patient-controlled analgesia after caesarean section: A network meta-analysis of randomised controlled trials
Source: PubMed Central journal article supplement (PMC9800204; doi:10.1016/j.eclinm.2022.101787), 2022-12-24
Supplement: mmc1.pdf [file mmc1.pdf]

## **Supplementary Materials**

# **Effects of opioids administered via intravenous or epidural patient-controlled analgesia after caesarean section: a network meta-analysis of randomised controlled trials**

Chun-Yu Chang, Yu-Kang Tu, Ming-Chang Kao, Ping-Cheng Shih, I-Min Su, Han-Yu Lin,  
Yung-Jiun Chien, Meng-Yu Wu, Chih-Hao Chen, Chu-Ting Chen

## Contents

|                                                                                                                                              |    |
|----------------------------------------------------------------------------------------------------------------------------------------------|----|
| <b>Supplementary Materials</b> .....                                                                                                         | 1  |
| <b>Contents</b> .....                                                                                                                        | 2  |
| <b>Supplementary Table S1.</b> Detailed search queries .....                                                                                 | 4  |
| <b>Supplementary Table S2.</b> Opioid consumption.....                                                                                       | 7  |
| <b>Supplementary Figure S1.</b> Risk of bias summary and graph .....                                                                         | 11 |
| <b>Supplementary Figure S2.</b> Forest plots from pairwise comparisons of treatment agents on pain intensity at 4 hours after surgery .....  | 12 |
| <b>Supplementary Figure S3.</b> Network treatment comparisons for studies investigating the effects of opioids on pain intensity.....        | 15 |
| <b>Supplementary Table S3.</b> Comparative efficacy of treatments on pain intensity at 4 hours after surgery.....                            | 16 |
| <b>Supplementary Figure S4.</b> Network meta-analysis forest plots of pain intensity .....                                                   | 18 |
| <b>Supplementary Figure S5.</b> Cumulative ranking probability of the effects of each treatment on pain intensity.....                       | 20 |
| <b>Supplementary Figure S6.</b> Forest plots from pairwise comparisons of treatment agents on pain intensity at 8 hours after surgery .....  | 21 |
| <b>Supplementary Table S4.</b> Comparative efficacy of treatments on pain intensity at 8 hours after surgery.....                            | 22 |
| <b>Supplementary Figure S7.</b> Forest plots from pairwise comparisons of treatment agents on pain intensity at 12 hours after surgery ..... | 23 |
| <b>Supplementary Table S5.</b> Comparative efficacy of treatments on pain intensity at 12 hours after surgery.....                           | 24 |
| <b>Supplementary Figure S8.</b> Forest plots from pairwise comparisons of treatment agents on pain intensity at 24 hours after surgery ..... | 25 |
| <b>Supplementary Table S6.</b> Comparative efficacy of treatments on pain intensity at 24 hours after surgery.....                           | 26 |
| <b>Supplementary Figure S9.</b> Forest plots from pairwise comparisons of treatment agents on nausea/vomiting .....                          | 28 |
| <b>Supplementary Figure S10.</b> Network treatment comparisons for studies investigating the effects of opioids on adverse effects.....      | 30 |
| <b>Supplementary Table S7.</b> Comparative efficacy of treatments on nausea/vomiting.....                                                    | 31 |
| <b>Supplementary Figure S11.</b> Network meta-analysis forest plots of adverse effects .....                                                 | 34 |
| <b>Supplementary Figure S12.</b> Cumulative ranking probability of the effects of each treatment on adverse effects .....                    | 36 |
| <b>Supplementary Figure S13.</b> Forest plots from pairwise comparisons of treatment agents on pruritus.....                                 | 37 |
| <b>Supplementary Table S8.</b> Comparative efficacy of treatments on pruritus.....                                                           | 38 |
| <b>Supplementary Figure S14.</b> Forest plots from pairwise comparisons of treatment agents on sedation/drowsiness ....                      | 39 |
| <b>Supplementary Table S9.</b> Comparative efficacy of treatments on sedation/drowsiness .....                                               | 40 |
| <b>Supplementary Figure S15.</b> Sensitivity analysis of pain intensity .....                                                                | 42 |

|                                                                                        |    |
|----------------------------------------------------------------------------------------|----|
| <b>Supplementary Figure S16.</b> Clustered ranking plots.....                          | 49 |
| <b>Supplementary Table S10.</b> Assessment of network inconsistency .....              | 50 |
| <b>Supplementary Figure S17.</b> Comparison-adjusted funnel plots.....                 | 57 |
| <b>Supplementary Figure S18.</b> Egger’s test.....                                     | 61 |
| <b>Supplementary Table S11.</b> GRADE approach for rating the quality of evidence..... | 62 |
| <b>References</b> .....                                                                | 95 |

Supplementary Table S1. Detailed search queries

| Database | Query                                                                                                                                                                                                                                                                                                                                                                                                                                                                                                                                                                                                                                                                                                                                                                                                                                                                                                                                                                                                                                                                                                                                                                                                                                                                                                                                                                                                                                                                                                                                                                                                                                                                                                                                                                                                                                                                                                                                                                                                                                                                                                                                                                                                                                                                                                                                                                                                                                                                                                                                                                                                                                                                                                                                                                                                                                                                                                                                                                                                                                                                                                             | Results |
|----------|-------------------------------------------------------------------------------------------------------------------------------------------------------------------------------------------------------------------------------------------------------------------------------------------------------------------------------------------------------------------------------------------------------------------------------------------------------------------------------------------------------------------------------------------------------------------------------------------------------------------------------------------------------------------------------------------------------------------------------------------------------------------------------------------------------------------------------------------------------------------------------------------------------------------------------------------------------------------------------------------------------------------------------------------------------------------------------------------------------------------------------------------------------------------------------------------------------------------------------------------------------------------------------------------------------------------------------------------------------------------------------------------------------------------------------------------------------------------------------------------------------------------------------------------------------------------------------------------------------------------------------------------------------------------------------------------------------------------------------------------------------------------------------------------------------------------------------------------------------------------------------------------------------------------------------------------------------------------------------------------------------------------------------------------------------------------------------------------------------------------------------------------------------------------------------------------------------------------------------------------------------------------------------------------------------------------------------------------------------------------------------------------------------------------------------------------------------------------------------------------------------------------------------------------------------------------------------------------------------------------------------------------------------------------------------------------------------------------------------------------------------------------------------------------------------------------------------------------------------------------------------------------------------------------------------------------------------------------------------------------------------------------------------------------------------------------------------------------------------------------|---------|
| PubMed   | <p>(("analgesia, obstetrical"[MeSH Terms] OR "analgesia, obstetrical/adverse effects"[MeSH Terms] OR "analgesia, obstetrical/statistics and numerical data"[MeSH Terms] OR "analgesia, obstetrical/therapeutic use"[MeSH Terms] OR "analgesia, obstetrical/therapy"[MeSH Terms] OR "analgesia, patient controlled"[MeSH Terms] OR "analgesia, patient controlled/adverse effects"[MeSH Terms] OR "analgesia, patient controlled/statistics and numerical data"[MeSH Terms] OR "analgesia, patient controlled/therapeutic use"[MeSH Terms] OR "analgesia, patient controlled/therapy"[MeSH Terms] OR "analgesia, epidural"[MeSH Terms] OR "analgesia, epidural/adverse effects"[MeSH Terms] OR "analgesia, epidural/statistics and numerical data"[MeSH Terms] OR "analgesia, epidural/therapeutic use"[MeSH Terms] OR "analgesia, epidural/therapy"[MeSH Terms] OR ("patient-controlled analgesia"[Title/Abstract] OR "patient-controlled analgesia"[Title/Abstract] OR "intravenous patient-controlled analgesia"[Title/Abstract] OR "intravenous patient-controlled analgesia"[Title/Abstract] OR "patient-controlled intravenous analgesia"[Title/Abstract] OR "patient-controlled intravenous analgesia"[Title/Abstract] OR "patient-controlled epidural analgesia"[Title/Abstract] OR "patient-controlled epidural analgesia"[Title/Abstract] OR "epidural patient-controlled analgesia"[Title/Abstract] OR "patient-controlled epidural analgesia"[Title/Abstract] OR "epidural analgesia"[Title/Abstract] OR "epidural"[Title/Abstract])) OR ("patient-controlled analgesia"[All Fields] OR "patient-controlled analgesia"[All Fields] OR "intravenous patient-controlled analgesia"[All Fields] OR "intravenous patient-controlled analgesia"[All Fields] OR "patient-controlled intravenous analgesia"[All Fields] OR "patient-controlled intravenous analgesia"[All Fields] OR "patient-controlled epidural analgesia"[All Fields] OR "patient-controlled epidural analgesia"[All Fields] OR "epidural patient-controlled analgesia"[All Fields] OR "patient-controlled epidural analgesia"[All Fields] OR "epidural analgesia"[All Fields] OR "epidural"[All Fields])) AND ("Cesarean Section"[MeSH Terms] OR ("Cesarean Section"[Title/Abstract] OR "cesarean sections"[Title/Abstract] OR "abdominal delivery"[Title/Abstract] OR "abdominal deliveries"[Title/Abstract] OR "caesarean section"[Title/Abstract] OR "caesarean sections"[Title/Abstract] OR "c-section"[Title/Abstract] OR "c-sections"[Title/Abstract] OR "c-section"[Title/Abstract] OR "c-sections"[Title/Abstract] OR "postcesarean section"[Title/Abstract] OR "postcaesarean section"[Title/Abstract])) OR ("Cesarean Section"[All Fields] OR "cesarean sections"[All Fields] OR "abdominal delivery"[All Fields] OR "abdominal deliveries"[All Fields] OR "caesarean section"[All Fields] OR "caesarean sections"[All Fields] OR "c-section"[All Fields] OR "c-sections"[All Fields] OR "c-section"[All Fields] OR "c-sections"[All Fields] OR "postcesarean section"[All Fields] OR "postcaesarean section"[All Fields]))</p> | 4908    |
| Embase   | <p>('cesarean section'/exp OR 'birth, abdominal operation' OR 'birth, caesarean' OR 'caesarean birth' OR 'caesarean section' OR 'caesarian birth' OR 'caesarian section' OR 'cesarean delivery' OR 'cesarean section' OR 'cesarian section' OR 'elective repeat cesarean section'</p>                                                                                                                                                                                                                                                                                                                                                                                                                                                                                                                                                                                                                                                                                                                                                                                                                                                                                                                                                                                                                                                                                                                                                                                                                                                                                                                                                                                                                                                                                                                                                                                                                                                                                                                                                                                                                                                                                                                                                                                                                                                                                                                                                                                                                                                                                                                                                                                                                                                                                                                                                                                                                                                                                                                                                                                                                             | 2840    |

OR 'fetectomy' OR 'repeated cesarotomy' OR 'sectio caesarea') AND ('patient controlled analgesia'/exp OR 'analgesia, patient controlled' OR 'analgesia, patient-controlled' OR 'patient controlled anaesthesia' OR 'patient controlled analgesia' OR 'patient controlled anesthesia' OR 'patient-controlled analgesia' OR 'self anaesthesia' OR 'self anesthesia' OR 'intravenous patient controlled analgesia'/exp OR 'epidural analgesia'/exp OR 'analgesia, epidural' OR 'epidural analgesia' OR 'extradural analgesia' OR 'peridural analgesia' OR 'patient controlled epidural analgesia'/exp)

| Web of Science   | TS= (("patient-controlled analgesia" OR "patient controlled analgesia" OR "intravenous patient-controlled analgesia" OR "intravenous patient controlled analgesia" OR "patient-controlled intravenous analgesia" OR "patient controlled intravenous analgesia" OR "patient-controlled epidural analgesia" OR "patient controlled epidural analgesia" OR "epidural patient-controlled analgesia" OR "patient controlled epidural analgesia" OR "epidural analgesia" OR "epidural") AND ("cesarean section" OR "cesarean sections" OR "abdominal delivery" OR "abdominal deliveries" OR "caesarean section" OR "caesarean sections" OR "c-section" OR "c-sections" OR "c section" OR "c sections" OR "postcesarean section" OR "postcaesarean section") AND (random* OR randomized OR "randomized control" OR "randomized controlled" OR randomised OR "randomised control" OR "randomised controlled"))                                                                                                                                | 919  |        |      |    |                                                             |     |    |                                                                                                                                             |     |    |                                                                    |      |    |                                                                                                                                                    |     |    |                                                          |      |    |                                                                                                                                    |  |     |
|------------------|---------------------------------------------------------------------------------------------------------------------------------------------------------------------------------------------------------------------------------------------------------------------------------------------------------------------------------------------------------------------------------------------------------------------------------------------------------------------------------------------------------------------------------------------------------------------------------------------------------------------------------------------------------------------------------------------------------------------------------------------------------------------------------------------------------------------------------------------------------------------------------------------------------------------------------------------------------------------------------------------------------------------------------------|------|--------|------|----|-------------------------------------------------------------|-----|----|---------------------------------------------------------------------------------------------------------------------------------------------|-----|----|--------------------------------------------------------------------|------|----|----------------------------------------------------------------------------------------------------------------------------------------------------|-----|----|----------------------------------------------------------|------|----|------------------------------------------------------------------------------------------------------------------------------------|--|-----|
| Scopus           | TITLE-ABS-KEY(("patient-controlled analgesia" OR "patient controlled analgesia" OR "intravenous patient-controlled analgesia" OR "intravenous patient controlled analgesia" OR "patient-controlled intravenous analgesia" OR "patient controlled intravenous analgesia" OR "patient-controlled epidural analgesia" OR "patient controlled epidural analgesia" OR "epidural patient-controlled analgesia" OR "patient controlled epidural analgesia" OR "epidural analgesia" OR "epidural") AND ("cesarean section" OR "cesarean sections" OR "abdominal delivery" OR "abdominal deliveries" OR "caesarean section" OR "caesarean sections" OR "c-section" OR "c-sections" OR "c section" OR "c sections" OR "postcesarean section" OR "postcaesarean section") AND (random* OR randomized OR "randomized control" OR "randomized controlled" OR randomised OR "randomised control" OR "randomised controlled"))                                                                                                                       | 1516 |        |      |    |                                                             |     |    |                                                                                                                                             |     |    |                                                                    |      |    |                                                                                                                                                    |     |    |                                                          |      |    |                                                                                                                                    |  |     |
| Cochrane Library | <table border="1"> <thead> <tr> <th>ID</th> <th>Search</th> <th>Hits</th> </tr> </thead> <tbody> <tr> <td>#1</td> <td>MeSH descriptor: [Analgesia, Obstetrical] explode all trees</td> <td>992</td> </tr> <tr> <td>#2</td> <td>MeSH descriptor: [Analgesia, Obstetrical] explode all trees and with qualifier(s): [adverse effects - AE, statistics &amp; numerical data - SN]</td> <td>213</td> </tr> <tr> <td>#3</td> <td>MeSH descriptor: [Analgesia, Patient-Controlled] explode all trees</td> <td>2139</td> </tr> <tr> <td>#4</td> <td>MeSH descriptor: [Analgesia, Patient-Controlled] explode all trees and with qualifier(s): [adverse effects - AE, statistics &amp; numerical data - SN]</td> <td>235</td> </tr> <tr> <td>#5</td> <td>MeSH descriptor: [Analgesia, Epidural] explode all trees</td> <td>2096</td> </tr> <tr> <td>#6</td> <td>MeSH descriptor: [Analgesia, Epidural] explode all trees and with qualifier(s): [adverse effects - AE, statistics &amp; numerical data</td> <td></td> </tr> </tbody> </table> | ID   | Search | Hits | #1 | MeSH descriptor: [Analgesia, Obstetrical] explode all trees | 992 | #2 | MeSH descriptor: [Analgesia, Obstetrical] explode all trees and with qualifier(s): [adverse effects - AE, statistics & numerical data - SN] | 213 | #3 | MeSH descriptor: [Analgesia, Patient-Controlled] explode all trees | 2139 | #4 | MeSH descriptor: [Analgesia, Patient-Controlled] explode all trees and with qualifier(s): [adverse effects - AE, statistics & numerical data - SN] | 235 | #5 | MeSH descriptor: [Analgesia, Epidural] explode all trees | 2096 | #6 | MeSH descriptor: [Analgesia, Epidural] explode all trees and with qualifier(s): [adverse effects - AE, statistics & numerical data |  | 886 |
| ID               | Search                                                                                                                                                                                                                                                                                                                                                                                                                                                                                                                                                                                                                                                                                                                                                                                                                                                                                                                                                                                                                                | Hits |        |      |    |                                                             |     |    |                                                                                                                                             |     |    |                                                                    |      |    |                                                                                                                                                    |     |    |                                                          |      |    |                                                                                                                                    |  |     |
| #1               | MeSH descriptor: [Analgesia, Obstetrical] explode all trees                                                                                                                                                                                                                                                                                                                                                                                                                                                                                                                                                                                                                                                                                                                                                                                                                                                                                                                                                                           | 992  |        |      |    |                                                             |     |    |                                                                                                                                             |     |    |                                                                    |      |    |                                                                                                                                                    |     |    |                                                          |      |    |                                                                                                                                    |  |     |
| #2               | MeSH descriptor: [Analgesia, Obstetrical] explode all trees and with qualifier(s): [adverse effects - AE, statistics & numerical data - SN]                                                                                                                                                                                                                                                                                                                                                                                                                                                                                                                                                                                                                                                                                                                                                                                                                                                                                           | 213  |        |      |    |                                                             |     |    |                                                                                                                                             |     |    |                                                                    |      |    |                                                                                                                                                    |     |    |                                                          |      |    |                                                                                                                                    |  |     |
| #3               | MeSH descriptor: [Analgesia, Patient-Controlled] explode all trees                                                                                                                                                                                                                                                                                                                                                                                                                                                                                                                                                                                                                                                                                                                                                                                                                                                                                                                                                                    | 2139 |        |      |    |                                                             |     |    |                                                                                                                                             |     |    |                                                                    |      |    |                                                                                                                                                    |     |    |                                                          |      |    |                                                                                                                                    |  |     |
| #4               | MeSH descriptor: [Analgesia, Patient-Controlled] explode all trees and with qualifier(s): [adverse effects - AE, statistics & numerical data - SN]                                                                                                                                                                                                                                                                                                                                                                                                                                                                                                                                                                                                                                                                                                                                                                                                                                                                                    | 235  |        |      |    |                                                             |     |    |                                                                                                                                             |     |    |                                                                    |      |    |                                                                                                                                                    |     |    |                                                          |      |    |                                                                                                                                    |  |     |
| #5               | MeSH descriptor: [Analgesia, Epidural] explode all trees                                                                                                                                                                                                                                                                                                                                                                                                                                                                                                                                                                                                                                                                                                                                                                                                                                                                                                                                                                              | 2096 |        |      |    |                                                             |     |    |                                                                                                                                             |     |    |                                                                    |      |    |                                                                                                                                                    |     |    |                                                          |      |    |                                                                                                                                    |  |     |
| #6               | MeSH descriptor: [Analgesia, Epidural] explode all trees and with qualifier(s): [adverse effects - AE, statistics & numerical data                                                                                                                                                                                                                                                                                                                                                                                                                                                                                                                                                                                                                                                                                                                                                                                                                                                                                                    |      |        |      |    |                                                             |     |    |                                                                                                                                             |     |    |                                                                    |      |    |                                                                                                                                                    |     |    |                                                          |      |    |                                                                                                                                    |  |     |

---

- SN] 378

- #7 "patient-controlled analgesia" 4925
- #8 "patient controlled analgesia" 4925
- #9 "intravenous patient-controlled analgesia" 793
- #10 "patient controlled intravenous analgesia" 404
- #11 "patient-controlled epidural analgesia" 753
- #12 "patient controlled epidural analgesia" 753
- #13 "epidural patient-controlled analgesia" 78
- #14 "patient controlled epidural analgesia" 753
- #15 "epidural analgesia" 4502
- #16 MeSH descriptor: [Cesarean Section] explode all trees 3355
- #17 "cesarean section" 12960
- #18 "cesarean sections" 1170
- #19 "abdominal delivery" 39
- #20 "abdominal deliveries" 3
- #21 "caesarean section" 12961
- #22 "caesarean sections" 1170
- #23 "c-section" 5835
- #24 "c-sections" 5550
- #25 "c section" 5835
- #26 "c sections" 5550
- #27 "postcesarean section" 158
- #28 "postcaesarean section" 73
- #29 {OR #1-#15} 10164
- #30 {OR #16-#28} 18412
- #31 #29 AND #30 1063

Among 1063 records, there are 163 Cochrane reviews, 4 Cochrane protocols, 886 trials, 1 special collection, and 9 Clinical answers. 886 trials were then exported for screening for eligibility, whereas the rest of the publication types were excluded without exporting.

---

Supplementary Table S2. Opioid consumption

| Study                                | Comparisons                                     | Opioid consumption                              |
|--------------------------------------|-------------------------------------------------|-------------------------------------------------|
| Wu et al., 2021 <sup>1</sup>         | • IVPCA tramadol (4 mg ml <sup>-1</sup> )       | 178 (155, 213) mL <sup>†</sup>                  |
|                                      | • IVPCA hydromorphone (40 µg ml <sup>-1</sup> ) | 182 (154, 210) mL <sup>†</sup>                  |
| Chi et al., 2017 <sup>2</sup>        | • IVPCA sufentanil (1.5 µg ml <sup>-1</sup> )   | 4 hours: 8.60 (3.51) mL <sup>‡</sup>            |
|                                      |                                                 | 8 hours: 14.49 (4.53) mL <sup>‡</sup>           |
|                                      |                                                 | 12 hours: 18.40 (7.71) mL <sup>‡</sup>          |
|                                      |                                                 | 24 hours: 42.90 (9.14) mL <sup>‡</sup>          |
|                                      | • IVPCA tramadol (10 mg ml <sup>-1</sup> )      | 4 hours: 9.49 (4.68) mL <sup>‡</sup>            |
|                                      |                                                 | 8 hours: 19.50 (4.67) mL <sup>‡</sup>           |
|                                      |                                                 | 12 hours: 27.47 (10.53) mL <sup>‡</sup>         |
|                                      |                                                 | 24 hours: 42.77 (10.94) mL <sup>‡</sup>         |
| Ebnesahidi et al., 2012 <sup>3</sup> | • IVPCA morphine (0.1 mg ml <sup>-1</sup> )     | NR                                              |
|                                      | • IVPCA methadone (0.05 mg ml <sup>-1</sup> )   | NR                                              |
| Saracoglu et al., 2010 <sup>4</sup>  | • IVPCA fentanyl (10 µg ml <sup>-1</sup> )      | 638.4 (179.10) µg <sup>‡</sup>                  |
|                                      | • IVPCA tramadol (10 mg ml <sup>-1</sup> )      | 559.5 (207.04) mg <sup>‡</sup>                  |
| Cohen et al., 2002 <sup>5</sup>      | • IVPCA fentanyl (20 µg ml <sup>-1</sup> )      | 6568 (1678) µg <sup>‡</sup>                     |
|                                      | • PCEA fentanyl (20 µg ml <sup>-1</sup> )       | 4484 (1100) µg <sup>‡</sup>                     |
| Cooper et al., 1999 <sup>6</sup>     | • IVPCA morphine (2 mg ml <sup>-1</sup> )       | 0-4 hours: 1.0 (0.3, 1.5) mg h <sup>-1†</sup>   |
|                                      |                                                 | 4-8 hours: 2.0 (1.1, 2.8) mg h <sup>-1†</sup>   |
|                                      |                                                 | 8-12 hours: 1.9 (1.2, 2.7) mg h <sup>-1†</sup>  |
|                                      |                                                 | 12-21 hours: 1.9 (1.1, 2.9) mg h <sup>-1†</sup> |
|                                      | • PCEA fentanyl (4 µg ml <sup>-1</sup> )        | 0-4 hours: 6 (0, 10) µg h <sup>-1†</sup>        |
|                                      |                                                 | 4-8 hours: 16 (9, 29) µg h <sup>-1†</sup>       |
|                                      | 8-12 hours: 20 (10, 25) µg h <sup>-1†</sup>     |                                                 |
|                                      | 12-21 hours: 18 (11, 26) µg h <sup>-1†</sup>    |                                                 |

|                                       |                                                                                           |                                                                                                                                                                                                |
|---------------------------------------|-------------------------------------------------------------------------------------------|------------------------------------------------------------------------------------------------------------------------------------------------------------------------------------------------|
| Kim et al., 1999 <sup>7</sup>         | • IVPCA morphine                                                                          | 12 hours: 37.4 (12.5) mg <sup>‡</sup><br>24 hours: 57.3 (21.0) mg <sup>‡</sup><br>48 hours: 78.3 (31.2) mg <sup>‡</sup>                                                                        |
|                                       | • IVPCA meperidine                                                                        | 12 hours: 283.0 (84.6) mg <sup>‡</sup><br>24 hours: 403.3 (125.1) mg <sup>‡</sup><br>48 hours: 526.7 (183.8) mg <sup>‡</sup>                                                                   |
| Vercauteren et al., 1999 <sup>8</sup> | • PCEA sufentanil (2 µg ml <sup>-1</sup> )                                                | 24 hours: 123.5 (47.20) µg <sup>‡</sup>                                                                                                                                                        |
|                                       | • PCEA tramadol (10 mg ml <sup>-1</sup> )                                                 | 24 hours: 652 (178.20) mg <sup>‡</sup>                                                                                                                                                         |
| James et al., 1997 <sup>9</sup>       | • IVPCA meptazinol (10 mg ml <sup>-1</sup> )<br>• IVPCA morphine (1 mg ml <sup>-1</sup> ) | The author only reported that the consumption of drugs was similar in both groups.                                                                                                             |
| Lee et al., 1997 <sup>10</sup>        | • IVPCA morphine                                                                          | 58.1 (23.8) mg <sup>‡</sup>                                                                                                                                                                    |
|                                       | • IVPCA meperidine                                                                        | 483.8 (211.5) mg <sup>‡</sup>                                                                                                                                                                  |
| Ngan Kee et al., 1997 <sup>11</sup>   | • IVPCA meperidine (10 mg ml <sup>-1</sup> )                                              | 0-12 hours: 240 (160, 320) mg <sup>‡</sup>                                                                                                                                                     |
|                                       | • PCEA meperidine (10 mg ml <sup>-1</sup> )                                               | 0-12 hours: 220 (160, 310) mg <sup>‡</sup>                                                                                                                                                     |
|                                       | • IVPCA fentanyl (20 µg ml <sup>-1</sup> )                                                | 0-12 hours: 1040 (800, 1400) µg <sup>‡</sup>                                                                                                                                                   |
|                                       | • PCEA fentanyl (20 µg ml <sup>-1</sup> )                                                 | 0-12 hours: 560 (480, 760) µg <sup>‡</sup>                                                                                                                                                     |
| Goh et al., 1996 <sup>12</sup>        | • PCEA fentanyl (10 µg ml <sup>-1</sup> )                                                 | NR                                                                                                                                                                                             |
|                                       | • PCEA meperidine (5 mg ml <sup>-1</sup> )                                                | NR                                                                                                                                                                                             |
| Cooper et al., 1995 <sup>13</sup>     | • IVPCA fentanyl (4 µg ml <sup>-1</sup> )                                                 | 0-4 hours: 11 (10) µg <sup>‡</sup><br>4-8 hours: 59 (27) µg <sup>‡</sup><br>8-12 hours: 43 (25) µg <sup>‡</sup><br>12-24 hours: 38 (19) µg <sup>‡</sup><br>0-24 hours: 40 (15) µg <sup>‡</sup> |
|                                       | • PCEA fentanyl (4 µg ml <sup>-1</sup> )                                                  | 0-4 hours: 13 (14) µg <sup>‡</sup><br>4-8 hours: 38 (30) µg <sup>‡</sup><br>8-12 hours: 37 (19) µg <sup>‡</sup><br>12-24 hours: 33 (20) µg <sup>‡</sup><br>0-24 hours: 32 (18) µg <sup>‡</sup> |



|                                     |                                                  |                                                                                               |
|-------------------------------------|--------------------------------------------------|-----------------------------------------------------------------------------------------------|
| Howell et al., 1995 <sup>14</sup>   | • IVPCA morphine (1 mg ml <sup>-1</sup> )        | Mean 8-hour dose: 19 (6.6) mg <sup>‡</sup><br>Mean 24-hour dose: 41 (16.1) mg <sup>‡</sup>    |
|                                     | • IVPCA fentanyl (25 µg ml <sup>-1</sup> )       | Mean 8-hour dose: 710 (475) µg <sup>‡</sup><br>Mean 24-hour dose: 1875 (1450) µg <sup>‡</sup> |
| Lee et al., 1995 <sup>15</sup>      | • IVPCA meperidine                               | 12 hours: 171.5 (101.6) mg <sup>‡</sup><br>24 hours: 252.5 (135.7) mg <sup>‡</sup>            |
|                                     | • PCEA meperidine <sup>‡</sup>                   | 12 hours: 74.1 (18.3) mg <sup>‡</sup><br>24 hours: 129 (24.7) mg <sup>‡</sup>                 |
| Grass et al., 1994 <sup>16</sup>    | • IVPCA morphine                                 | NR                                                                                            |
|                                     | • PCEA sufentanil                                | NR                                                                                            |
| Paech et al., 1994 <sup>17</sup>    | • PCEA meperidine (4 mg ml <sup>-1</sup> )       | 181 (155, 241) mg <sup>†</sup>                                                                |
|                                     | • IVPCA meperidine (4 mg ml <sup>-1</sup> )      | 426 (380, 480) mg <sup>†</sup>                                                                |
| Cohen et al., 1993 <sup>18</sup>    | • PCEA fentanyl (2 µg ml <sup>-1</sup> )         | Mean total dose: 1814 µg                                                                      |
|                                     | • PCEA sufentanil (0.8 µg ml <sup>-1</sup> )     | Mean total dose: 702 µg                                                                       |
| Cohen et al., 1992-A <sup>19</sup>  | • PCEA buprenorphine (3 µg ml <sup>-1</sup> )    | NR                                                                                            |
|                                     | • PCEA fentanyl (3 µg ml <sup>-1</sup> )         | NR                                                                                            |
| Cohen et al., 1992-B <sup>20</sup>  | • PCEA buprenorphine (3 µg ml <sup>-1</sup> )    | NR                                                                                            |
|                                     | • PCEA fentanyl (2 µg ml <sup>-1</sup> )         | NR                                                                                            |
| Parker et al., 1992 <sup>21</sup>   | • IVPCA hydromorphone (150 µg ml <sup>-1</sup> ) | Mean 24-hour dose: 7.6 (2.7) mg <sup>‡</sup>                                                  |
|                                     | • PCEA hydromorphone (75 µg ml <sup>-1</sup> )   | Mean 24-hour dose: 2.1 (1.1) mg <sup>‡</sup>                                                  |
| Sinatra et al. 1989-A <sup>22</sup> | • IVPCA morphine (1.5 mg ml <sup>-1</sup> )      | 24 hours: 52.9 (17.1) mL <sup>‡</sup>                                                         |

|                                     |                                                 |                                                                                         |
|-------------------------------------|-------------------------------------------------|-----------------------------------------------------------------------------------------|
|                                     | • IVPCA meperidine (15 mg ml <sup>-1</sup> )    | 24 hours: 57.4 (18.5) mL <sup>‡</sup>                                                   |
|                                     | • IVPCA oxymorphone (0.25 mg ml <sup>-1</sup> ) | 24 hours: 52.9 (14.8) mL <sup>‡</sup>                                                   |
| Sinatra et al. 1989-B <sup>23</sup> | • IVPCA morphine (1.5 mg ml <sup>-1</sup> )     | 12-hour dose: 51.5 (12.7) mg <sup>‡</sup><br>24-hour dose: 87.45 (25.4) mg <sup>‡</sup> |
|                                     | • IVPCA oxymorphone (0.25 mg ml <sup>-1</sup> ) | 12-hour dose: 57.3 (16.3) mg <sup>‡</sup><br>24-hour dose: 97.45 (28.3) mg <sup>‡</sup> |

<sup>†</sup>Data are presented as median (interquartile range).

<sup>‡</sup>Data are presented as mean (standard deviation).

IVPCA: intravenous patient-controlled analgesia; NR: not reported; PCEA: patient-controlled epidural analgesia

The opioid consumption refers to total accumulative consumption if not otherwise specified.

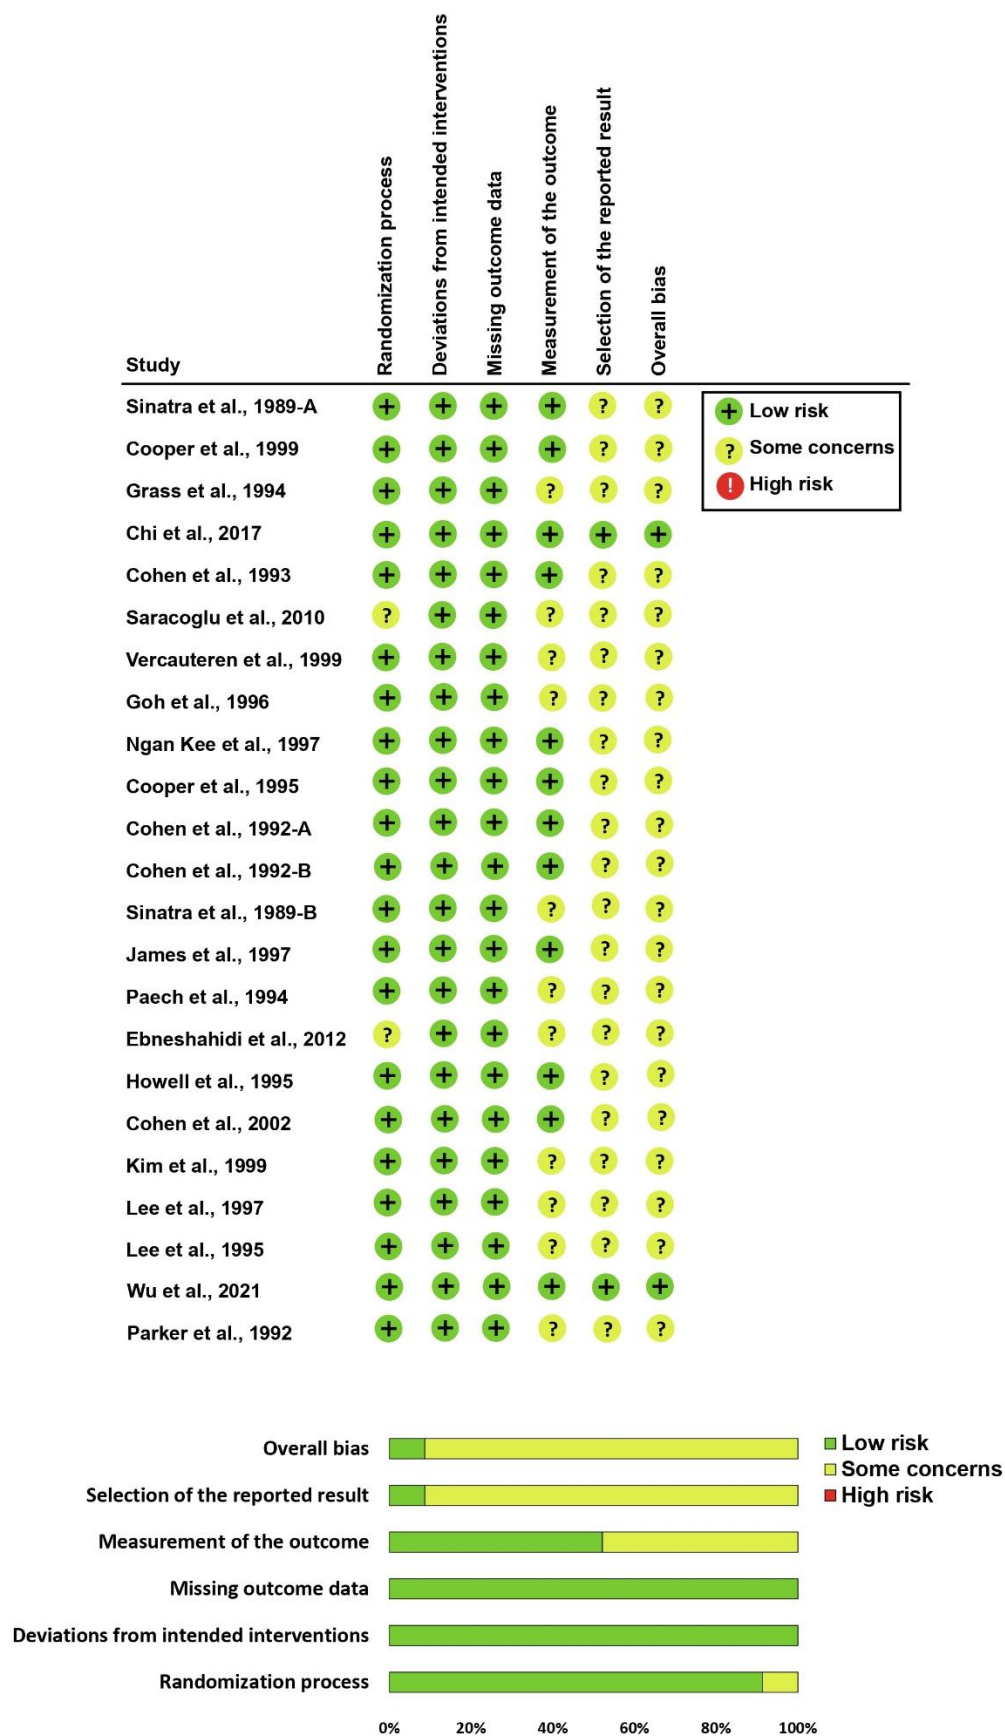

Supplementary Figure S1. Risk of bias summary and graph

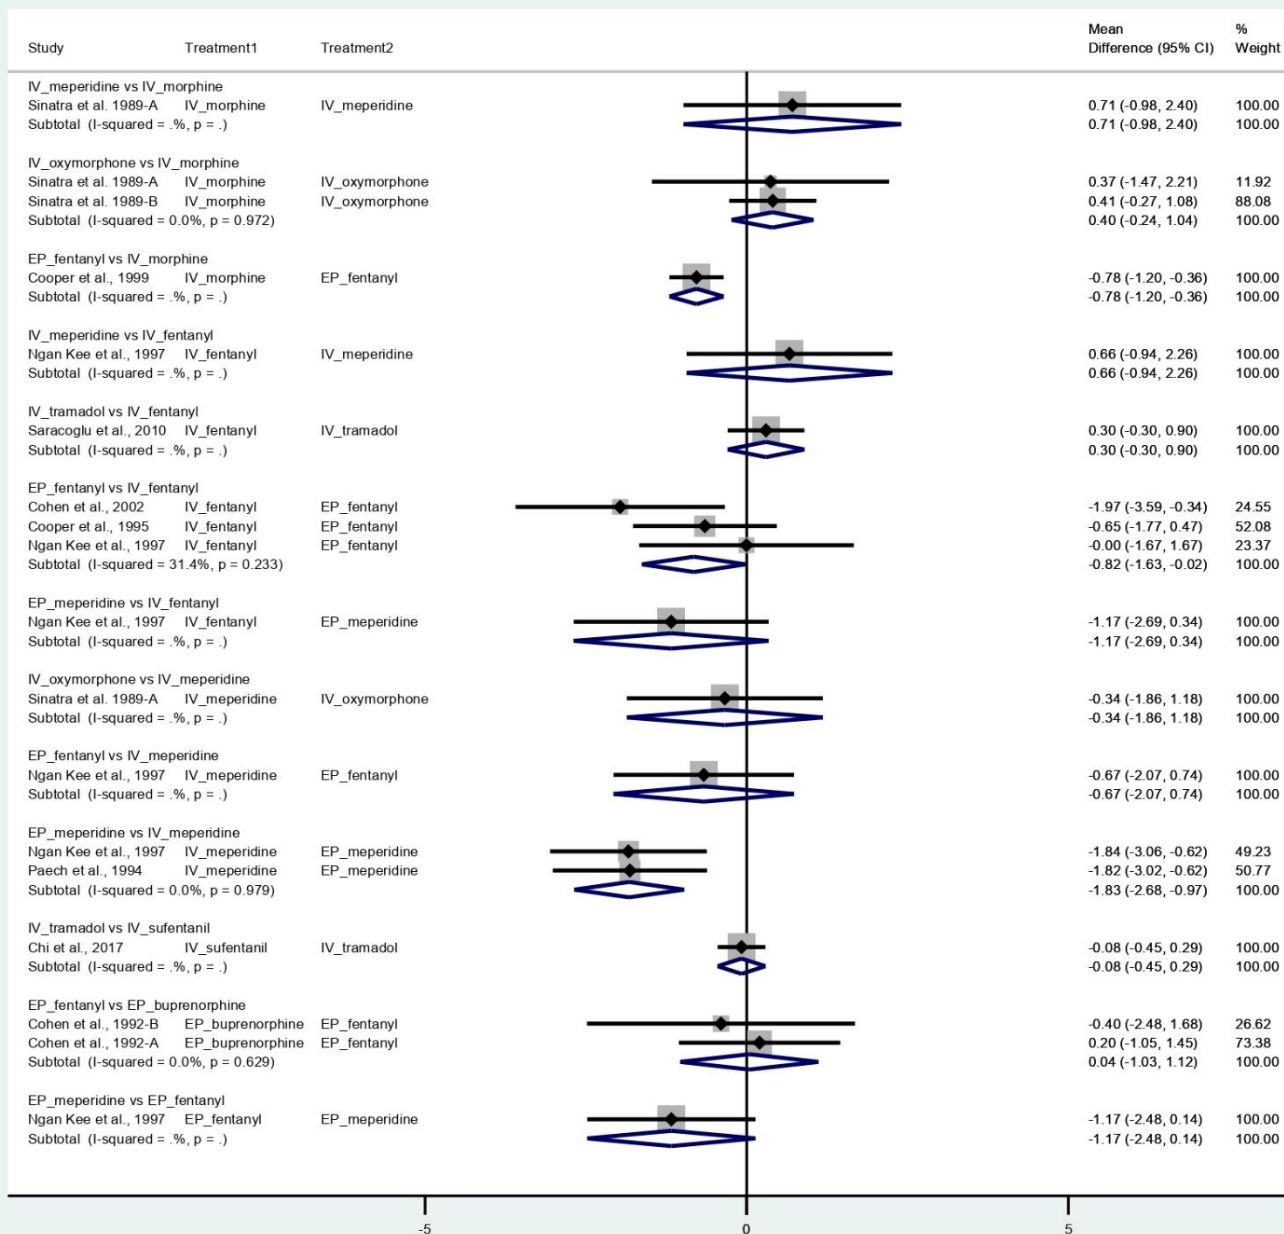

**Supplementary Figure S2.** Forest plots from pairwise comparisons of treatment agents on pain intensity at 4 hours after surgery

The prefix “IV\_” denotes IVPCA, and the prefix “EP\_” denotes PCEA. CI, confidence interval.

A.

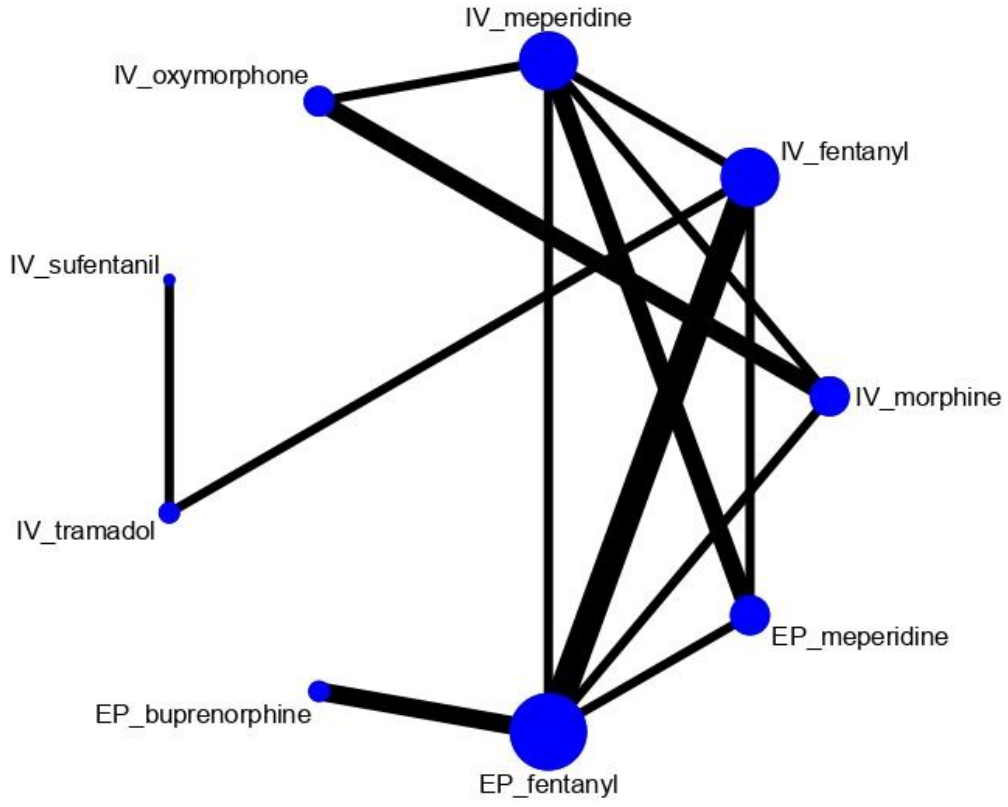

B.

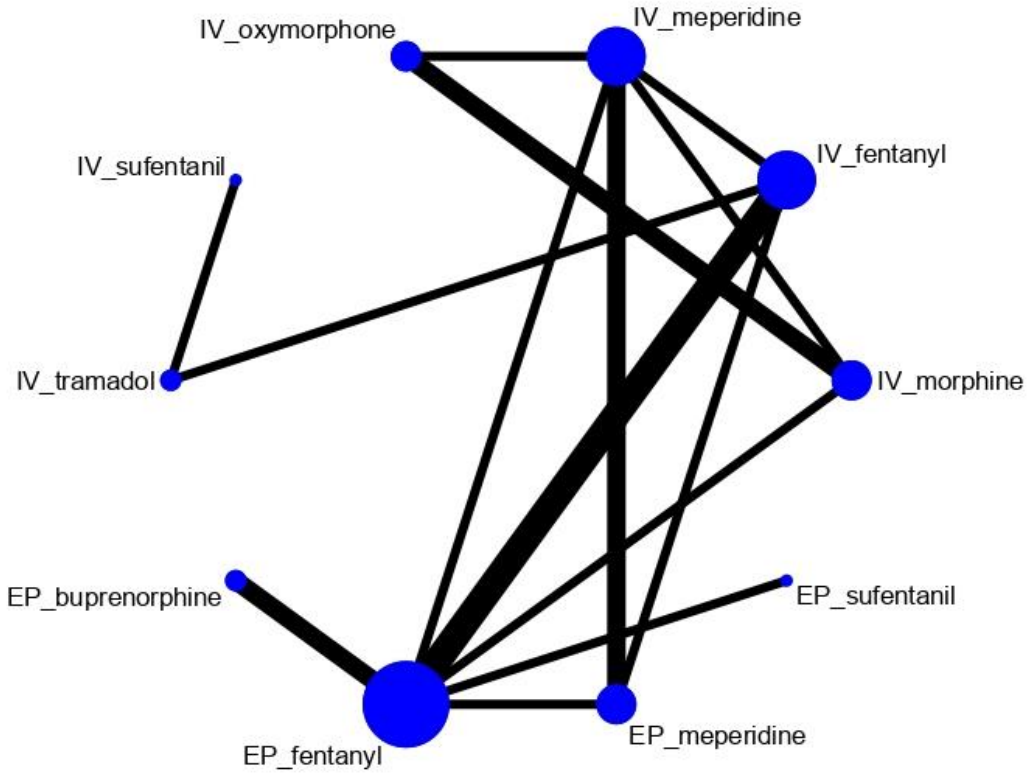

C.

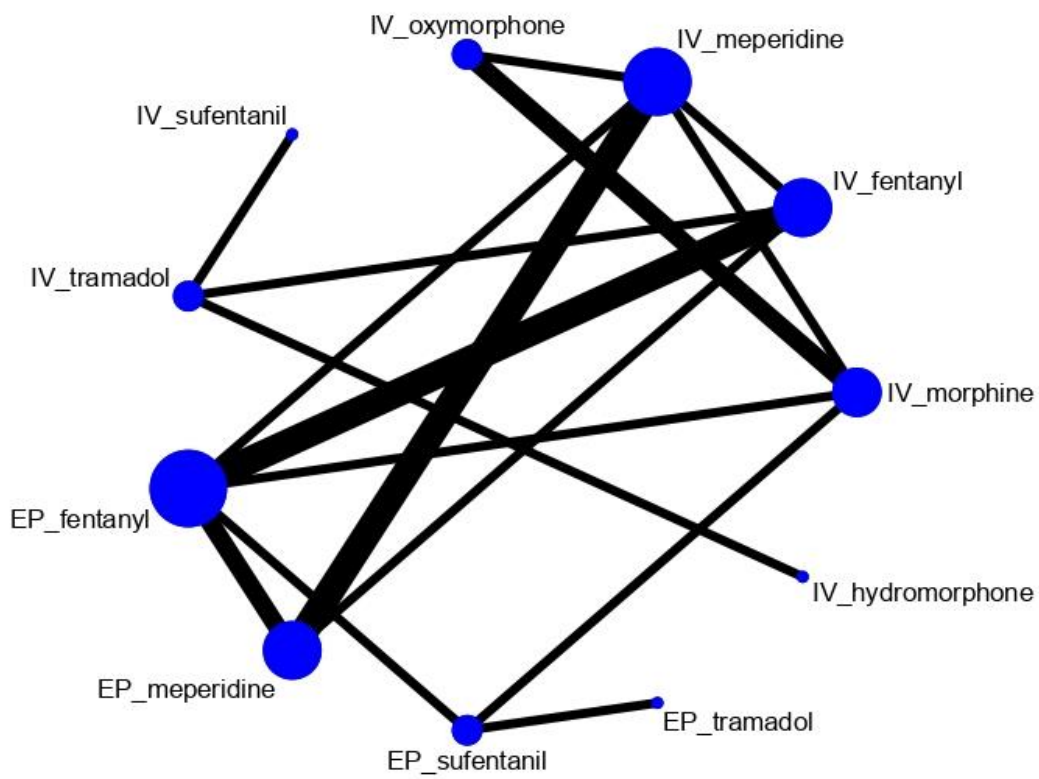

D.

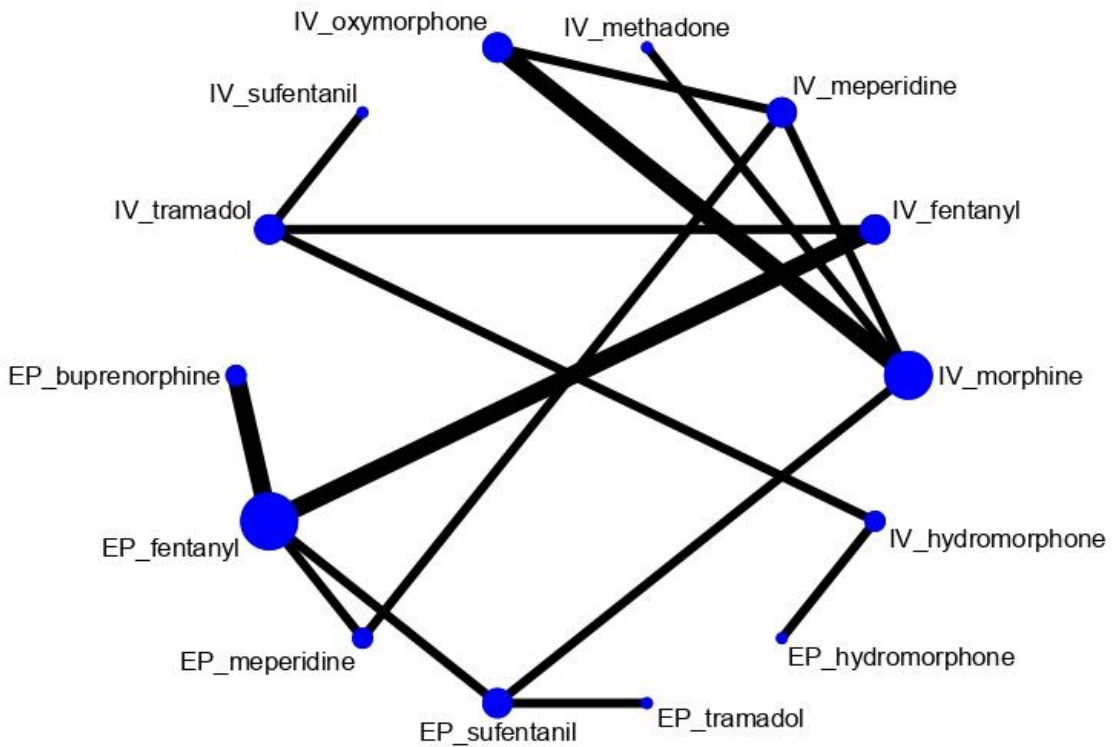

**Supplementary Figure S3.** Network treatment comparisons for studies investigating the effects of opioids on pain intensity

(A) 4 hours after surgery; (B) 8 hours after surgery; (C) 12 hours after surgery; (D) 24 hours after surgery. Each node represents a treatment, the size of which corresponds to the number of patients studied with each treatment. Treatments that are compared directly are joined with a line, the thickness of which corresponds to the number of trials that assessed the comparisons. The prefix “IV\_” denotes IVPCA, and the prefix “EP\_” denotes PCEA.

**Supplementary Table S3.** Comparative efficacy of treatments on pain intensity at 4 hours after surgery

|                       |                       |                         |                          |                         |                       |                           |                      |                        |
|-----------------------|-----------------------|-------------------------|--------------------------|-------------------------|-----------------------|---------------------------|----------------------|------------------------|
| <b>IVPCA morphine</b> |                       | -0.71 (-2.40, 0.98)     | -0.40 (-1.04, 0.24)      |                         |                       |                           | 0.78 (0.36, 1.20)    |                        |
| -0.11 (-0.99, 0.77)   | <b>IVPCA fentanyl</b> | -0.66 (-2.26, 0.94)     |                          |                         | -0.30 (-0.90, 0.30)   |                           | 0.82 (0.02, 1.63)    | 1.17 (-0.34, 2.69)     |
| -0.44 (-1.36, 0.48)   | -0.33 (-1.40, 0.74)   | <b>IVPCA meperidine</b> | 0.34 (-1.18, 1.86)       |                         |                       |                           | 0.67 (-0.74, 2.07)   | 1.83 (0.97, 2.68)      |
| -0.36 (-0.99, 0.26)   | -0.26 (-1.31, 0.79)   | 0.08 (-0.93, 1.09)      | <b>IVPCA oxymorphone</b> |                         |                       |                           |                      |                        |
| -0.49 (-1.62, 0.64)   | -0.38 (-1.08, 0.32)   | -0.05 (-1.33, 1.23)     | -0.12 (-1.39, 1.14)      | <b>IVPCA sufentanil</b> | 0.08 (-0.29, 0.45)    |                           |                      |                        |
| -0.41 (-1.47, 0.65)   | -0.30 (-0.90, 0.30)   | 0.03 (-1.19, 1.26)      | -0.04 (-1.25, 1.16)      | 0.08 (-0.29, 0.45)      | <b>IVPCA tramadol</b> |                           |                      |                        |
| 0.79 (-0.36, 1.94)    | 0.90 (-0.43, 2.24)    | 1.24 (-0.17, 2.64)      | 1.16 (-0.14, 2.46)       | 1.28 (-0.23, 2.79)      | 1.20 (-0.26, 2.67)    | <b>PCEA buprenorphine</b> | -0.04 (-1.12, 1.03)  |                        |
| 0.75 (0.34, 1.16)     | 0.86 (0.07, 1.66)     | 1.20 (0.29, 2.10)       | 1.12 (0.39, 1.85)        | 1.24 (0.18, 2.30)       | 1.16 (0.17, 2.16)     | -0.04 (-1.12, 1.03)       | <b>PCEA fentanyl</b> | 1.17 (-0.14, 2.48)     |
| 1.45 (0.42, 2.48)     | 1.56 (0.44, 2.68)     | 1.89 (1.07, 2.72)       | 1.82 (0.68, 2.95)        | 1.94 (0.62, 3.26)       | 1.86 (0.59, 3.13)     | 0.66 (-0.81, 2.12)        | 0.70 (-0.30, 1.69)   | <b>PCEA meperidine</b> |

Comparisons between treatments should be read from left to right, and the estimate is in the cell in common between the column-defining treatment and the row-defining treatment. The network estimates from network meta-analysis are in the lower triangle, and the direct treatment estimates from pairwise comparisons are in the upper triangle. Estimates are presented as mean difference (95% confidence interval).



A.

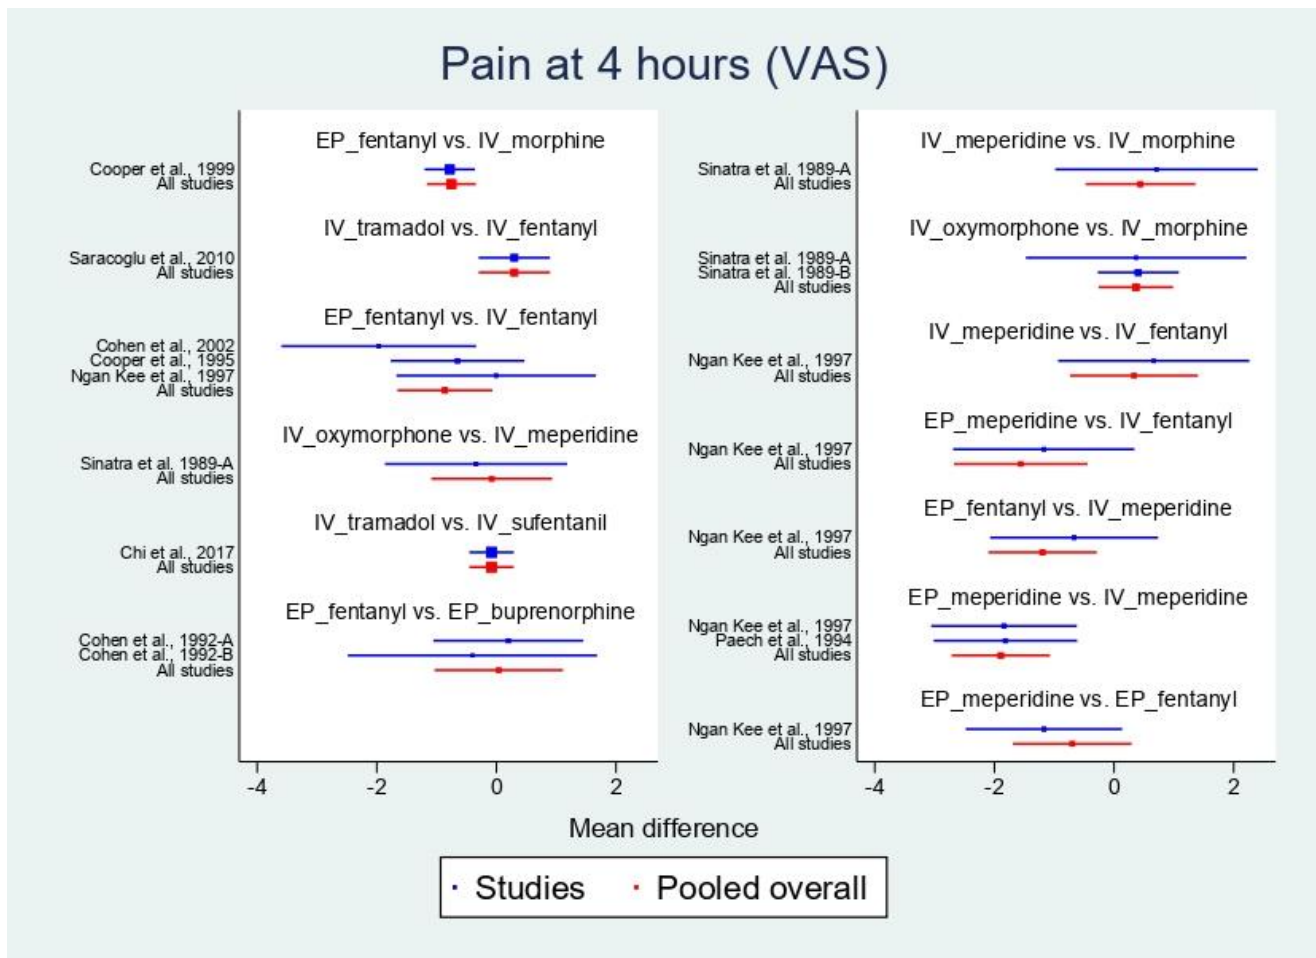

B.

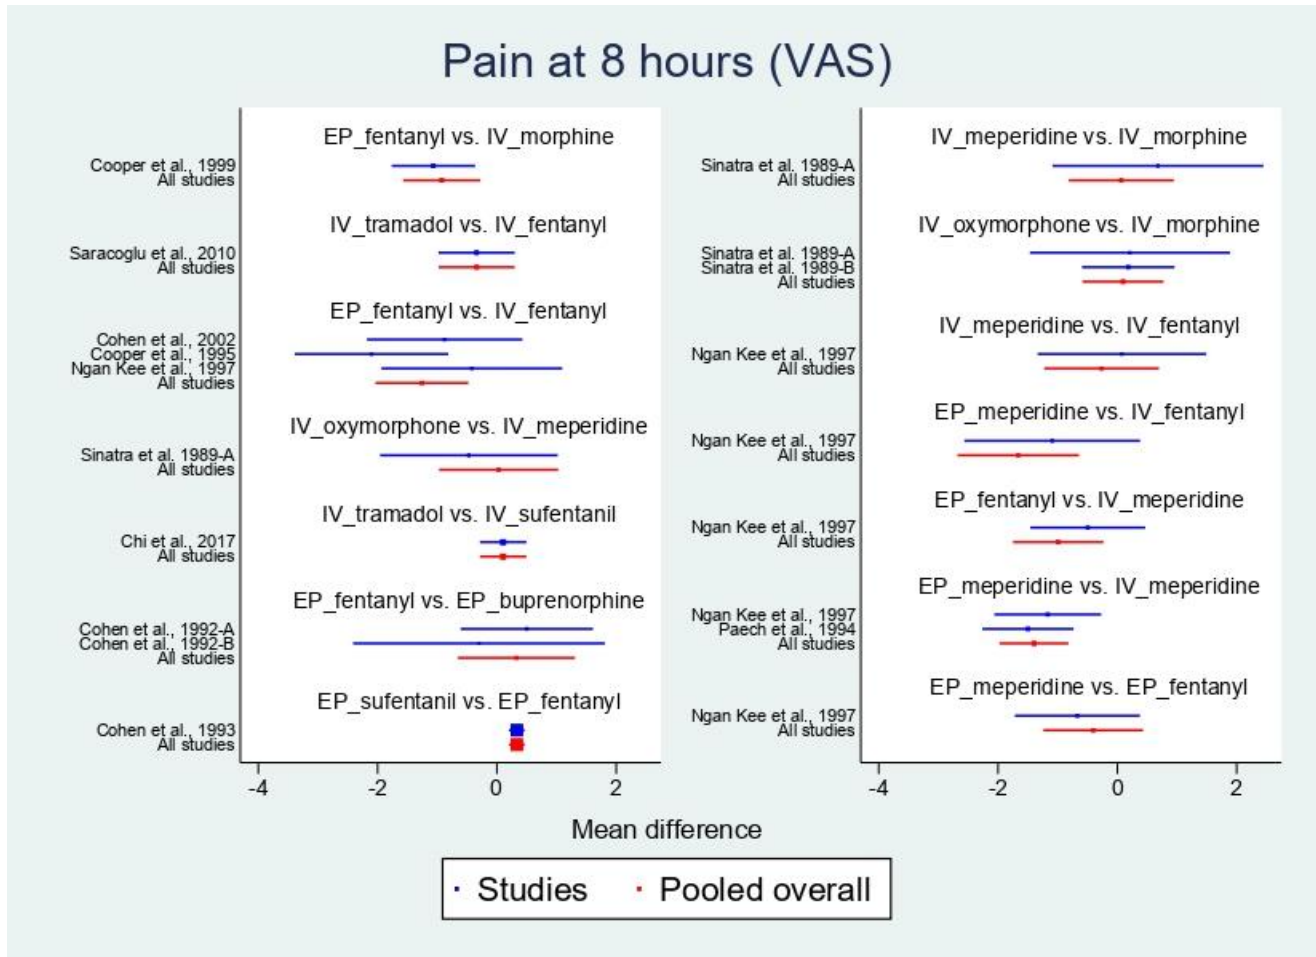

C.

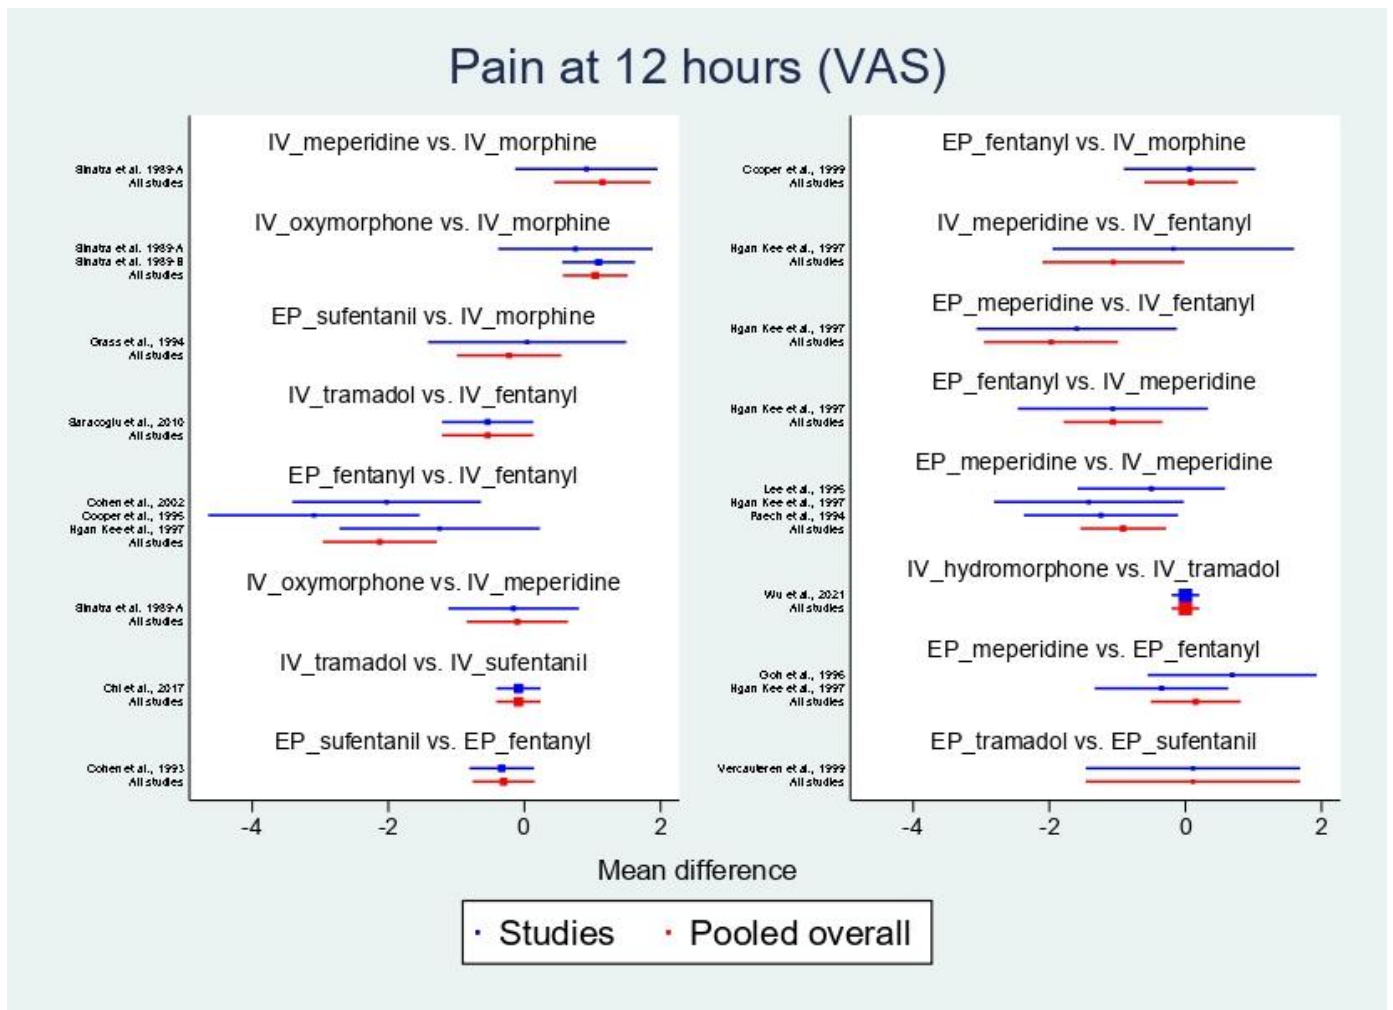

D.

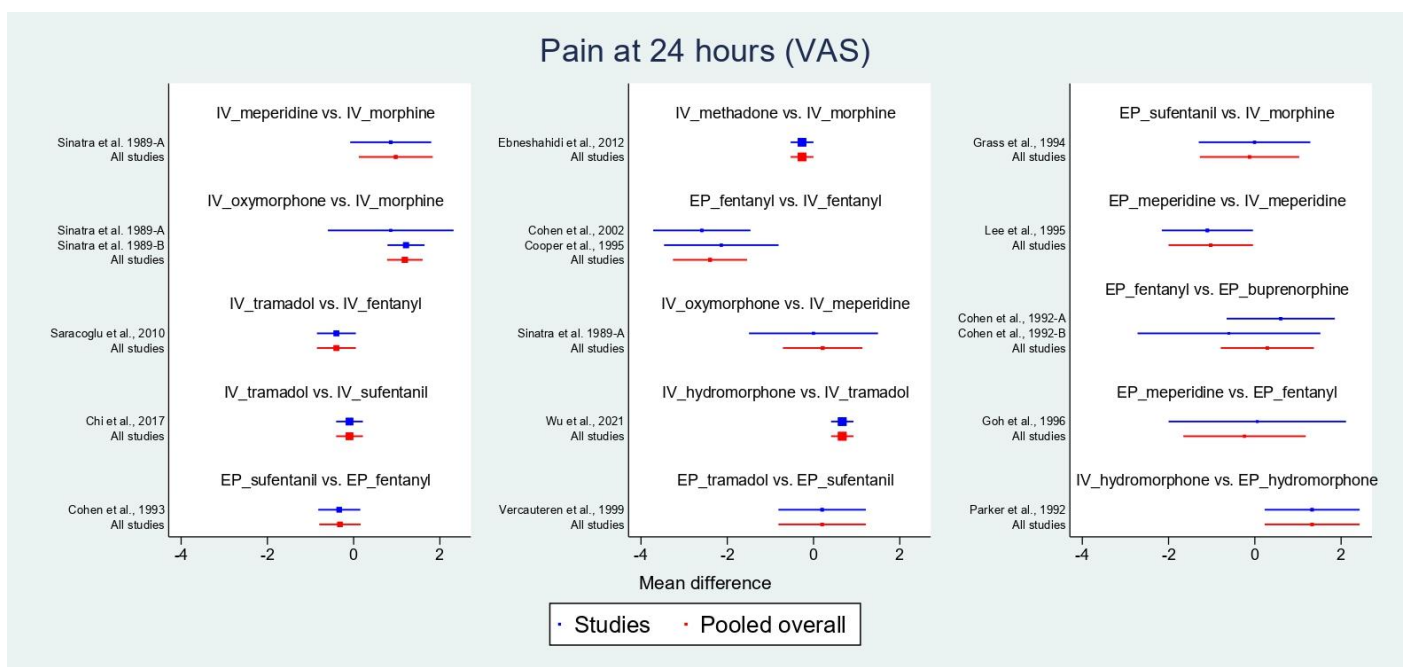

**Supplementary Figure S4.** Network meta-analysis forest plots of pain intensity

(A) 4 hours; (B) 8 hours; (C) 12 hours; (D) 24 hours after surgery. The blue dots and lines indicate the studies contributing the direct evidence. The red dots and lines indicate the pooled overall network estimates of the treatment effects. The prefix “IV\_” denotes IVPCA, and the prefix “EP\_” denotes PCEA. VAS, visual analogue scale.

A.

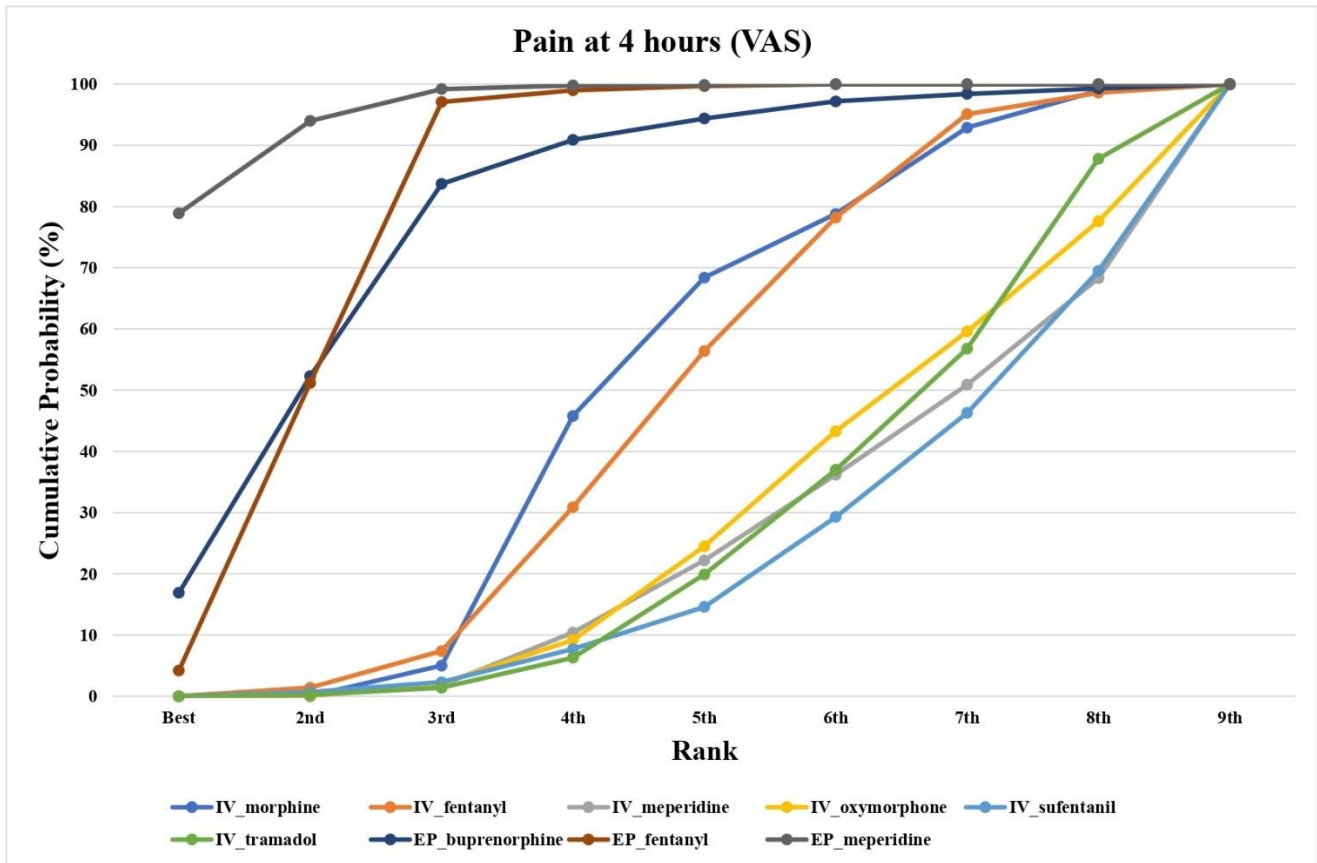

B.

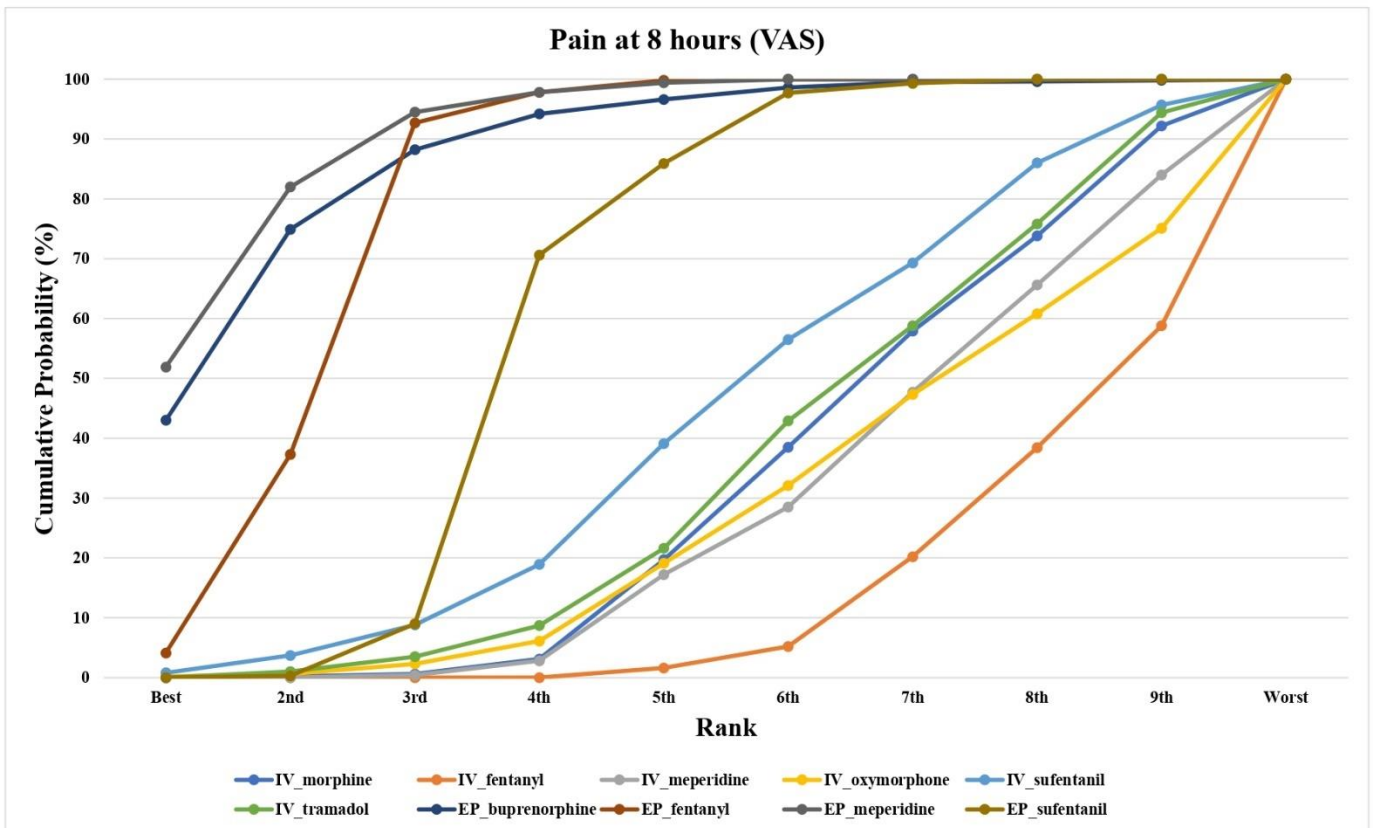

C.

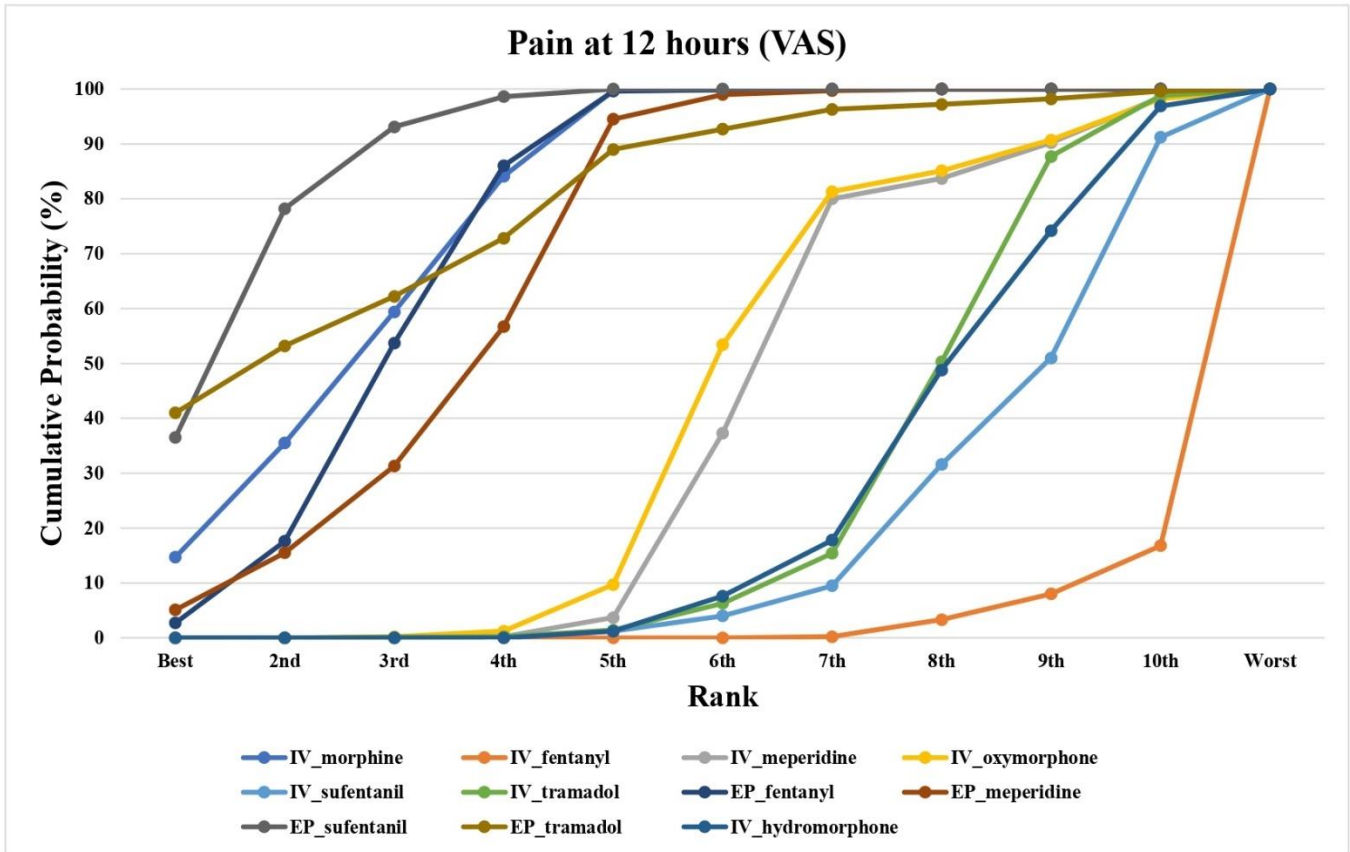

D.

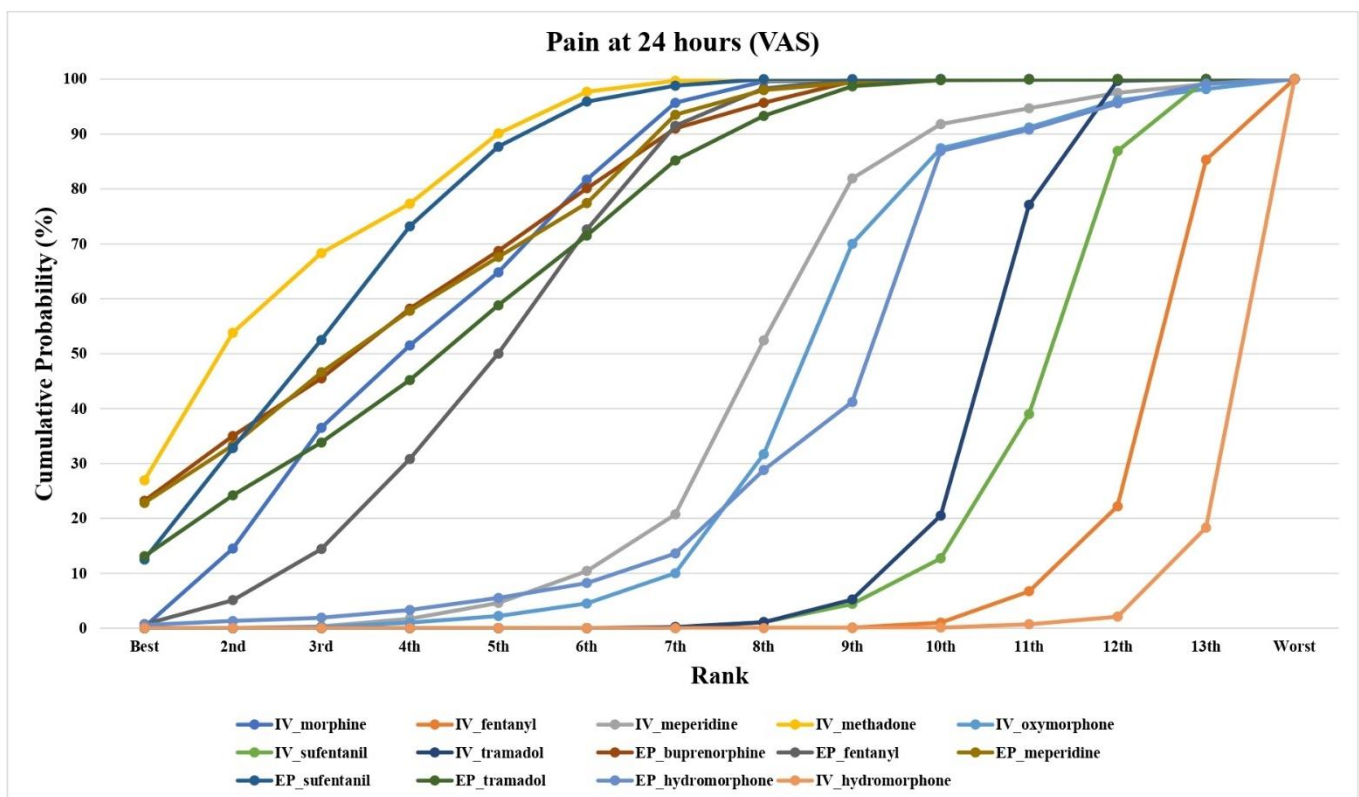

**Supplementary Figure S5.** Cumulative ranking probability of the effects of each treatment on pain intensity (A) 4 hours; (B) 8 hours; (C) 12 hours; (D) 24 hours after surgery. The prefix “IV\_” denotes IVPCA, and the prefix “EP\_” denotes PCEA. VAS, visual analogue scale.

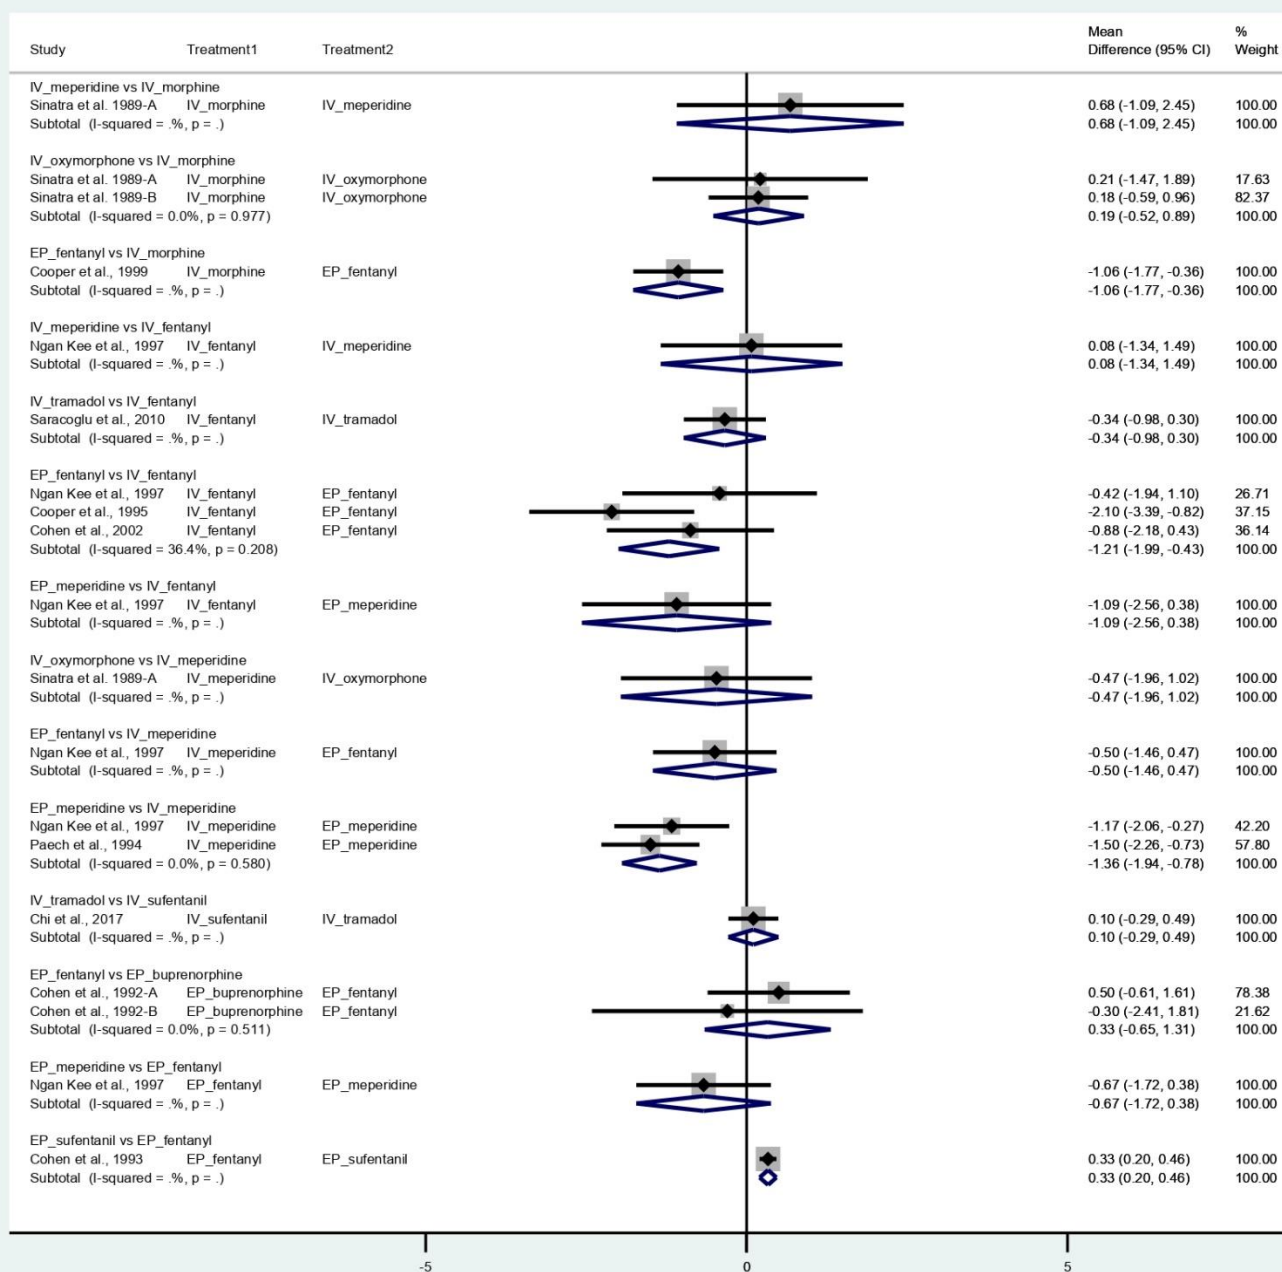

**Supplementary Figure S6.** Forest plots from pairwise comparisons of treatment agents on pain intensity at 8 hours after surgery

The prefix “IV\_” denotes IVPCA, and the prefix “EP\_” denotes PCEA. CI, confidence interval.

**Supplementary Table S4.** Comparative efficacy of treatments on pain intensity at 8 hours after surgery

|                       |                       |                         |                          |                         |                       |                           |                      |                        |                        |
|-----------------------|-----------------------|-------------------------|--------------------------|-------------------------|-----------------------|---------------------------|----------------------|------------------------|------------------------|
| <b>IVPCA morphine</b> |                       | -0.68 (-2.45, 1.09)     | -0.19 (-0.89, 0.52)      |                         |                       |                           | 1.06 (0.36, 1.77)    |                        |                        |
| -0.33 (-1.32, 0.66)   | <b>IVPCA fentanyl</b> | -0.08 (-1.49, 1.34)     |                          |                         | 0.34 (-0.30, 0.98)    |                           | 1.21 (0.43, 1.99)    | 1.09 (-0.38, 2.56)     |                        |
| -0.07 (-0.95, 0.82)   | 0.27 (-0.70, 1.23)    | <b>IVPCA meperidine</b> | 0.47 (-1.02, 1.96)       |                         |                       |                           | 0.50 (-0.47, 1.46)   | 1.36 (0.78, 1.94)      |                        |
| -0.09 (-0.78, 0.59)   | 0.24 (-0.91, 1.38)    | -0.03 (-1.03, 0.97)     | <b>IVPCA oxymorphone</b> |                         |                       |                           |                      |                        |                        |
| 0.11 (-1.13, 1.35)    | 0.44 (-0.30, 1.19)    | 0.18 (-1.04, 1.40)      | 0.21 (-1.16, 1.58)       | <b>IVPCA sufentanil</b> | -0.10 (-0.49, 0.29)   |                           |                      |                        |                        |
| 0.01 (-1.17, 1.19)    | 0.34 (-0.30, 0.98)    | 0.07 (-1.08, 1.23)      | 0.10 (-1.21, 1.42)       | -0.10 (-0.49, 0.29)     | <b>IVPCA tramadol</b> |                           |                      |                        |                        |
| 1.25 (0.08, 2.43)     | 1.58 (0.33, 2.84)     | 1.32 (0.08, 2.56)       | 1.35 (0.02, 2.67)        | 1.14 (-0.32, 2.60)      | 1.24 (-0.16, 2.65)    | <b>PCEA buprenorphine</b> | -0.33 (-1.31, 0.65)  |                        |                        |
| 0.93 (0.28, 1.57)     | 1.26 (0.48, 2.03)     | 0.99 (0.23, 1.75)       | 1.02 (0.13, 1.91)        | 0.81 (-0.27, 1.89)      | 0.92 (-0.09, 1.92)    | -0.33 (-1.31, 0.65)       | <b>PCEA fentanyl</b> | 0.67 (-0.38, 1.72)     | -0.33 (-0.46, -0.20)   |
| 1.33 (0.36, 2.30)     | 1.66 (0.64, 2.68)     | 1.40 (0.82, 1.97)       | 1.43 (0.33, 2.52)        | 1.22 (-0.05, 2.48)      | 1.32 (0.12, 2.52)     | 0.08 (-1.21, 1.37)        | 0.41 (-0.43, 1.24)   | <b>PCEA meperidine</b> |                        |
| 0.59 (-0.07, 1.25)    | 0.92 (0.13, 1.71)     | 0.66 (-0.11, 1.43)      | 0.69 (-0.21, 1.58)       | 0.48 (-0.61, 1.57)      | 0.58 (-0.43, 1.60)    | -0.66 (-1.65, 0.33)       | -0.33 (-0.46, -0.20) | -0.74 (-1.59, 0.11)    | <b>PCEA sufentanil</b> |

Comparisons between treatments should be read from left to right, and the estimate is in the cell in common between the column-defining treatment and the row-defining treatment. The network estimates from network meta-analysis are in the lower triangle, and the direct treatment estimates from pairwise comparisons are in the upper triangle. Estimates are presented as mean difference (95% confidence interval).

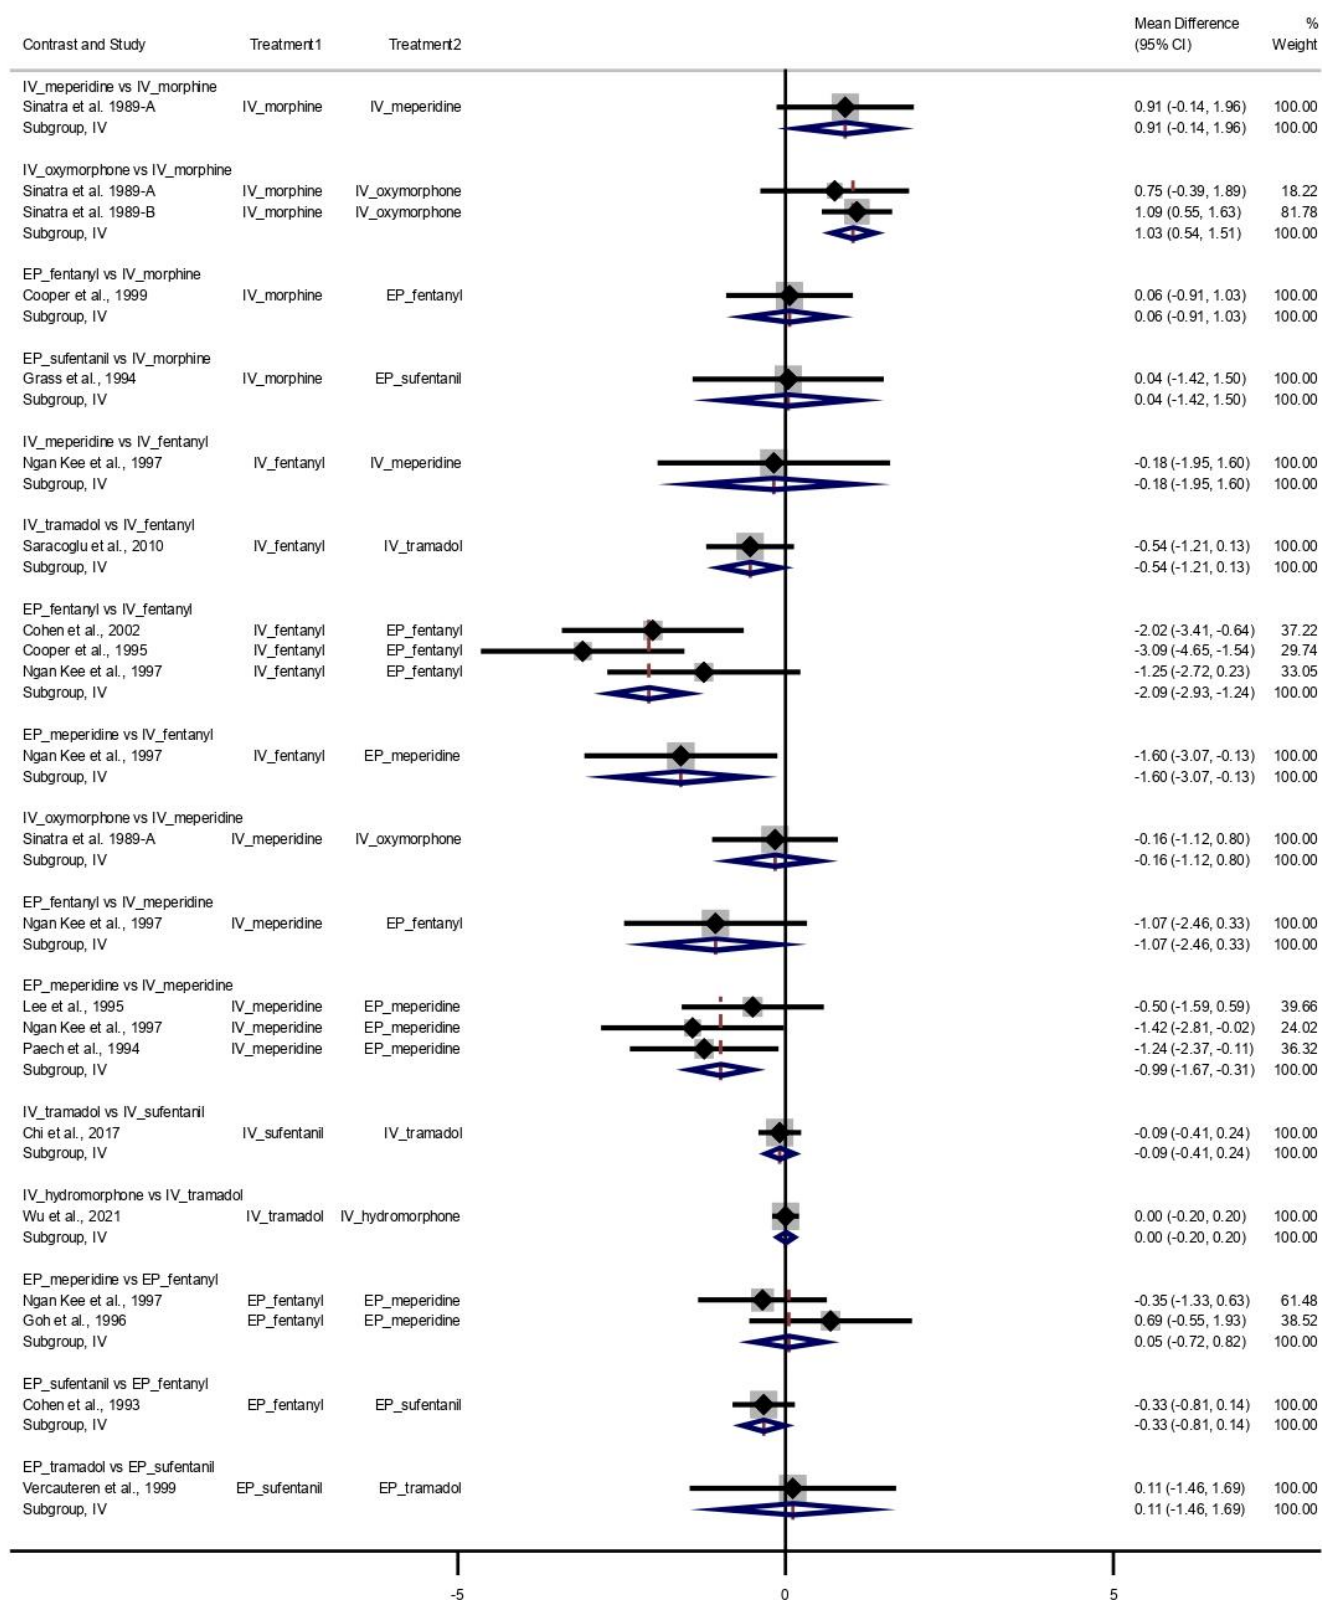

**Supplementary Figure S7.** Forest plots from pairwise comparisons of treatment agents on pain intensity at 12 hours after surgery

The prefix “IV\_” denotes IVPCA, and the prefix “EP\_” denotes PCEA. CI, confidence interval.

**Supplementary Table S5.** Comparative efficacy of treatments on pain intensity at 12 hours after surgery

|                       |                       |                         |                          |                         |                       |                      |                        |                        |                      |                            |
|-----------------------|-----------------------|-------------------------|--------------------------|-------------------------|-----------------------|----------------------|------------------------|------------------------|----------------------|----------------------------|
| <b>IVPCA morphine</b> |                       | -0.91 (-1.96, 0.14)     | -1.03 (-1.51, -0.54)     |                         |                       | -0.06 (-1.03, 0.91)  |                        | -0.04 (-1.50, 1.42)    |                      |                            |
| -2.21 (-3.26, -1.15)  | <b>IVPCA fentanyl</b> | 0.18 (-1.60, 1.95)      |                          |                         | 0.54 (-0.13, 1.21)    | 2.09 (1.24, 2.93)    | 1.60 (0.13, 3.07)      |                        |                      |                            |
| -1.15 (-1.86, -0.44)  | 1.06 (0.02, 2.10)     | <b>IVPCA meperidine</b> | 0.16 (-0.80, 1.12)       |                         |                       | 1.07 (-0.33, 2.46)   | 0.99 (0.31, 1.67)      |                        |                      |                            |
| -1.04 (-1.52, -0.57)  | 1.16 (0.05, 2.28)     | 0.10 (-0.64, 0.85)      | <b>IVPCA oxymorphone</b> |                         |                       |                      |                        |                        |                      |                            |
| -1.75 (-3.04, -0.47)  | 0.45 (-0.29, 1.20)    | -0.61 (-1.89, 0.67)     | -0.71 (-2.05, 0.63)      | <b>IVPCA sufentanil</b> | 0.09 (-0.24, 0.41)    |                      |                        |                        |                      |                            |
| -1.67 (-2.91, -0.42)  | 0.54 (-0.13, 1.21)    | -0.52 (-1.76, 0.72)     | -0.62 (-1.92, 0.68)      | 0.09 (-0.24, 0.41)      | <b>IVPCA tramadol</b> |                      |                        |                        |                      | 0.00 (-0.20, 0.20)         |
| -0.08 (-0.77, 0.61)   | 2.12 (1.29, 2.96)     | 1.06 (0.34, 1.79)       | 0.96 (0.17, 1.75)        | 1.67 (0.55, 2.79)       | 1.58 (0.51, 2.66)     | <b>PCEA fentanyl</b> | -0.05 (-0.82, 0.72)    | 0.33 (-0.14, 0.81)     |                      |                            |
| -0.23 (-1.03, 0.57)   | 1.97 (0.99, 2.96)     | 0.91 (0.28, 1.54)       | 0.81 (-0.05, 1.67)       | 1.52 (0.29, 2.76)       | 1.43 (0.24, 2.63)     | -0.15 (-0.81, 0.51)  | <b>PCEA meperidine</b> |                        |                      |                            |
| 0.22 (-0.54, 0.99)    | 2.43 (1.48, 3.38)     | 1.37 (0.54, 2.20)       | 1.27 (0.40, 2.13)        | 1.98 (0.77, 3.19)       | 1.89 (0.73, 3.05)     | 0.31 (-0.15, 0.76)   | 0.46 (-0.33, 1.24)     | <b>PCEA sufentanil</b> | -0.11 (-1.69, 1.46)  |                            |
| 0.11 (-1.64, 1.86)    | 2.32 (0.48, 4.16)     | 1.26 (-0.52, 3.04)      | 1.15 (-0.64, 2.95)       | 1.87 (-0.12, 3.85)      | 1.78 (-0.18, 3.74)    | 0.19 (-1.45, 1.83)   | 0.35 (-1.42, 2.11)     | -0.11 (-1.69, 1.46)    | <b>PCEA tramadol</b> |                            |
| -1.67 (-2.93, -0.40)  | 0.54 (-0.16, 1.24)    | -0.52 (-1.78, 0.74)     | -0.62 (-1.94, 0.69)      | 0.09 (-0.30, 0.47)      | 0.00 (-0.20, 0.20)    | -1.58 (-2.68, -0.49) | -1.43 (-2.64, -0.22)   | -1.89 (-3.07, -0.71)   | -1.78 (-3.75, 0.19)  | <b>IVPCA hydromorphone</b> |

Comparisons between treatments should be read from left to right, and the estimate is in the cell in common between the column-defining treatment and the row-defining treatment. The network estimates from network meta-analysis are in the lower triangle, and the direct treatment estimates from pairwise comparisons are in the upper triangle. Estimates are presented as mean difference (95% confidence interval).



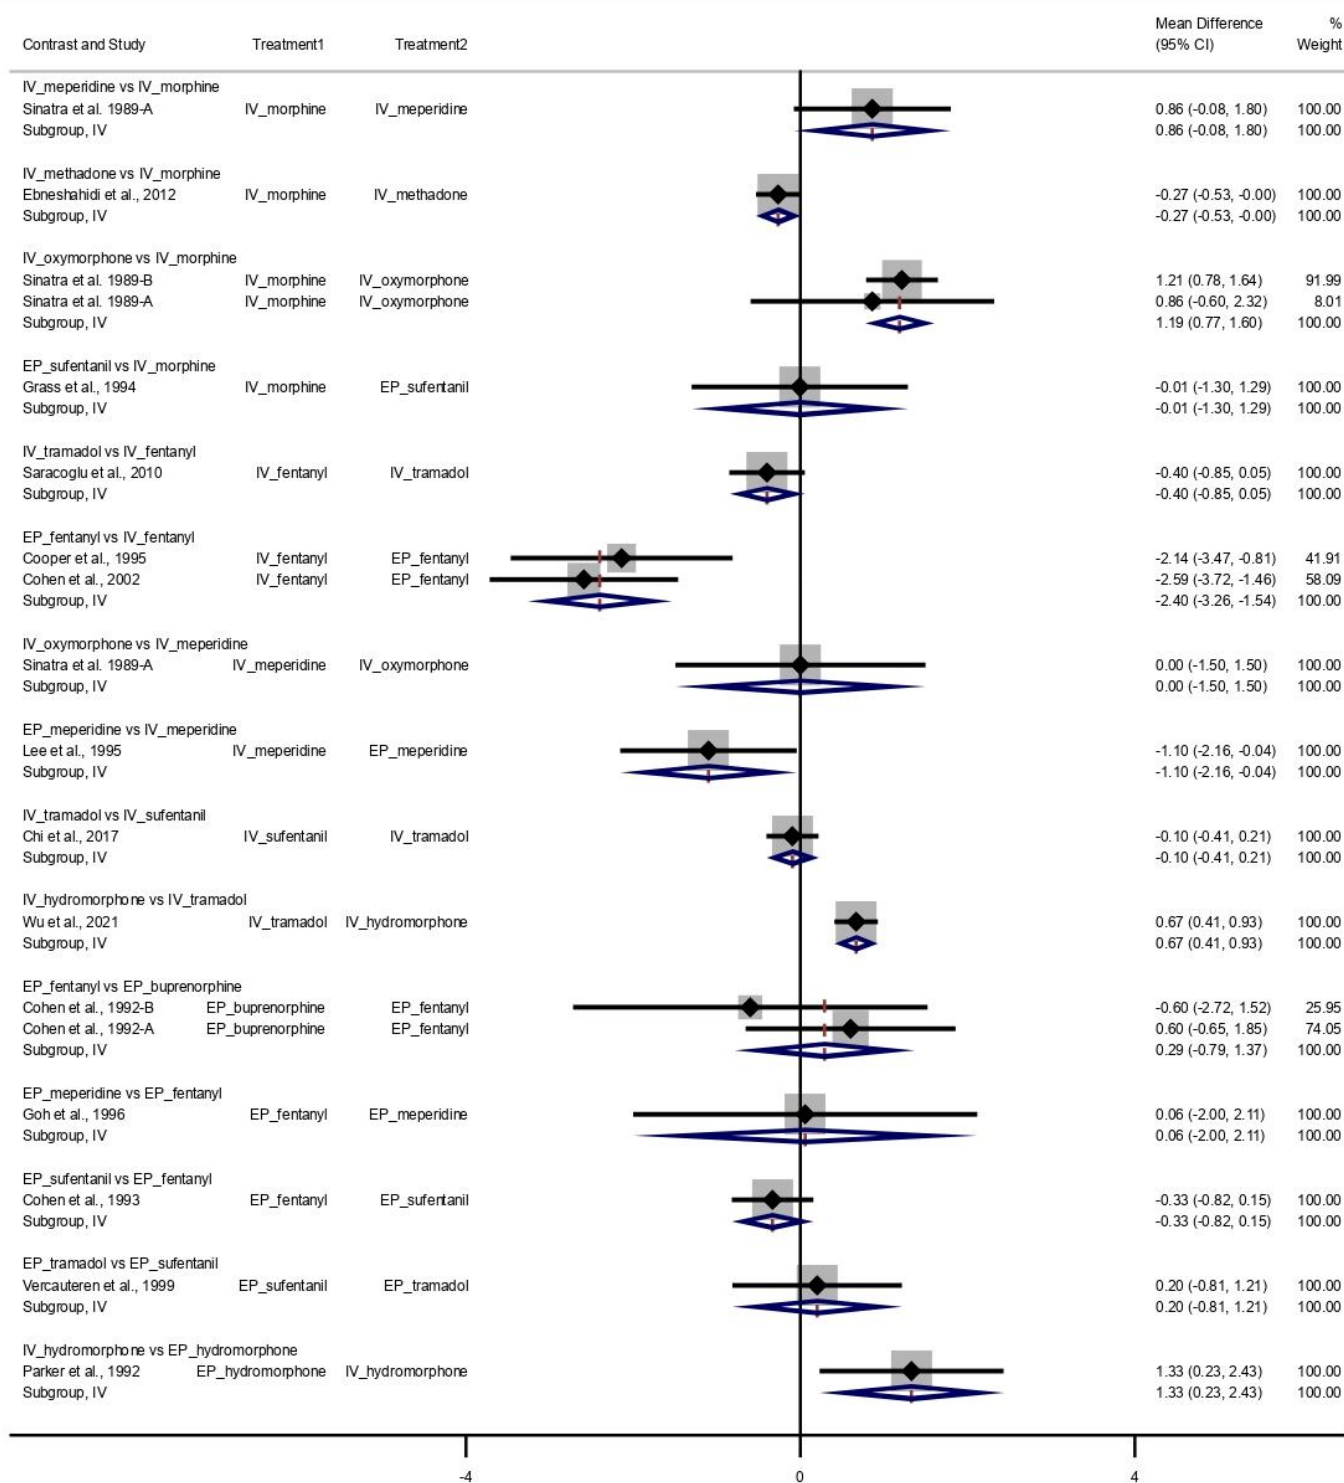

**Supplementary Figure S8.** Forest plots from pairwise comparisons of treatment agents on pain intensity at 24 hours after surgery

The prefix “IV\_” denotes IVPCA, and the prefix “EP\_” denotes PCEA. CI, confidence interval.

**Supplementary Table S6.** Comparative efficacy of treatments on pain intensity at 24 hours after surgery

|                       |                       |                         |                        |                          |                         |                       |                           |                      |                        |                    |  |  |                      |
|-----------------------|-----------------------|-------------------------|------------------------|--------------------------|-------------------------|-----------------------|---------------------------|----------------------|------------------------|--------------------|--|--|----------------------|
| <b>IVPCA morphine</b> |                       | -0.86 (-1.80, 0.08)     | 0.27 (0.00, 0.53)      | -1.19 (-1.60, -0.77)     |                         |                       |                           |                      |                        | 0.01 (-1.29, 1.30) |  |  |                      |
| -2.59 (-4.08, -1.11)  | <b>IVPCA fentanyl</b> |                         |                        |                          |                         | 0.40 (-0.05, 0.85)    |                           | 2.40 (1.54, 3.26)    |                        |                    |  |  |                      |
| -0.98 (-1.83, -0.12)  | 1.62 (0.02, 3.21)     | <b>IVPCA meperidine</b> |                        | 0.00 (-1.50, 1.50)       |                         |                       |                           |                      | 1.10 (0.04, 2.16)      |                    |  |  |                      |
| 0.27 (0.00, 0.53)     | 2.86 (1.35, 4.37)     | 1.24 (0.35, 2.14)       | <b>IVPCA methadone</b> |                          |                         |                       |                           |                      |                        |                    |  |  |                      |
| -1.19 (-1.60, -0.78)  | 1.41 (-0.13, 2.94)    | -0.21 (-1.13, 0.71)     | -1.45 (-1.94, -0.96)   | <b>IVPCA oxymorphone</b> |                         |                       |                           |                      |                        |                    |  |  |                      |
| -2.29 (-3.87, -0.71)  | 0.30 (-0.24, 0.85)    | -1.31 (-3.00, 0.37)     | -2.56 (-4.16, -0.95)   | -1.10 (-2.73, 0.53)      | <b>IVPCA sufentanil</b> | 0.10 (-0.21, 0.41)    |                           |                      |                        |                    |  |  |                      |
| -2.19 (-3.74, -0.64)  | 0.40 (-0.05, 0.85)    | -1.22 (-2.88, 0.44)     | -2.46 (-4.03, -0.89)   | -1.01 (-2.60, 0.59)      | 0.10 (-0.21, 0.41)      | <b>IVPCA tramadol</b> |                           |                      |                        |                    |  |  | -0.67 (-0.93, -0.41) |
| 0.10 (-1.52, 1.72)    | 2.69 (1.31, 4.07)     | 1.07 (-0.65, 2.80)      | -0.17 (-1.81, 1.47)    | 1.28 (-0.38, 2.95)       | 2.38 (0.90, 3.87)       | 2.29 (0.84, 3.74)     | <b>PCEA buprenorphine</b> | -0.29 (-1.37, 0.79)  |                        |                    |  |  |                      |
| -0.19 (-1.40, 1.02)   | 2.40 (1.54, 3.26)     | 0.78 (-0.56, 2.13)      | -0.46 (-1.70, 0.78)    | 1.00 (-0.28, 2.27)       | 2.10 (1.08, 3.12)       | 2.00 (1.03, 2.97)     | -0.29 (-1.37, 0.79)       | <b>PCEA fentanyl</b> | -0.06 (-2.11, 2.00)    | 0.33 (-0.15, 0.82) |  |  |                      |
| 0.05 (-1.17, 1.26)    | 2.64 (0.98, 4.30)     | 1.02 (0.04, 2.00)       | -0.22 (-1.46, 1.02)    | 1.23 (-0.03, 2.50)       | 2.33 (0.59, 4.08)       | 2.24 (0.52, 3.96)     | -0.05 (-1.83, 1.73)       | 0.24 (-1.18, 1.66)   | <b>PCEA meperidine</b> |                    |  |  |                      |

|                      |                     |                      |                      |                      |                      |                      |                      |                      |                      |                            |                          |                               |                                |
|----------------------|---------------------|----------------------|----------------------|----------------------|----------------------|----------------------|----------------------|----------------------|----------------------|----------------------------|--------------------------|-------------------------------|--------------------------------|
|                      | 4.30)               |                      |                      |                      |                      |                      |                      |                      |                      |                            |                          |                               |                                |
| 0.12 (-1.03, 1.28)   | 2.72 (1.73, 3.70)   | 1.10 (-0.21, 2.41)   | -0.14 (-1.32, 1.04)  | 1.31 (0.09, 2.53)    | 2.41 (1.29, 3.54)    | 2.32 (1.23, 3.40)    | 0.03 (-1.15, 1.21)   | 0.32 (-0.16, 0.80)   | 0.08 (-1.33, 1.49)   | <b>PCEA<br/>sufentanil</b> | -0.20 (-1.21, 0.81)      |                               |                                |
| -0.08 (-1.61, 1.46)  | 2.52 (1.10, 3.93)   | 0.90 (-0.76, 2.56)   | -0.34 (-1.90, 1.21)  | 1.11 (-0.47, 2.70)   | 2.21 (0.70, 3.73)    | 2.12 (0.63, 3.60)    | -0.17 (-1.73, 1.39)  | 0.12 (-1.00, 1.24)   | -0.12 (-1.86, 1.62)  | -0.20 (-1.21, 0.81)        | <b>PCEA<br/>tramadol</b> |                               |                                |
| -1.53 (-3.45, 0.39)  | 1.06 (-0.16, 2.28)  | -0.56 (-2.56, 1.45)  | -1.80 (-3.73, 0.14)  | -0.34 (-2.30, 1.61)  | 0.76 (-0.42, 1.93)   | 0.66 (-0.47, 1.79)   | -1.63 (-3.47, 0.21)  | -1.34 (-2.83, 0.15)  | -1.58 (-3.64, 0.48)  | -1.66 (-3.22, -0.09)       | -1.46 (-3.32, 0.41)      | <b>PCEA<br/>hydromorphone</b> | -1.33 (-2.43, -0.23)           |
| -2.86 (-4.43, -1.29) | -0.27 (-0.79, 0.25) | -1.88 (-3.56, -0.20) | -3.13 (-4.72, -1.53) | -1.67 (-3.29, -0.05) | -0.57 (-0.98, -0.17) | -0.67 (-0.93, -0.41) | -2.96 (-4.43, -1.48) | -2.67 (-3.67, -1.66) | -2.91 (-4.64, -1.17) | -2.98 (-4.10, -1.87)       | -2.78 (-4.29, -1.28)     | -1.33 (-2.43, -0.23)          | <b>IVPCA<br/>hydromorphone</b> |

Comparisons between treatments should be read from left to right, and the estimate is in the cell in common between the column-defining treatment and the row-defining treatment. The network estimates from network meta-analysis are in the lower triangle, and the direct treatment estimates from pairwise comparisons are in the upper triangle. Estimates are presented as mean difference (95% confidence interval).

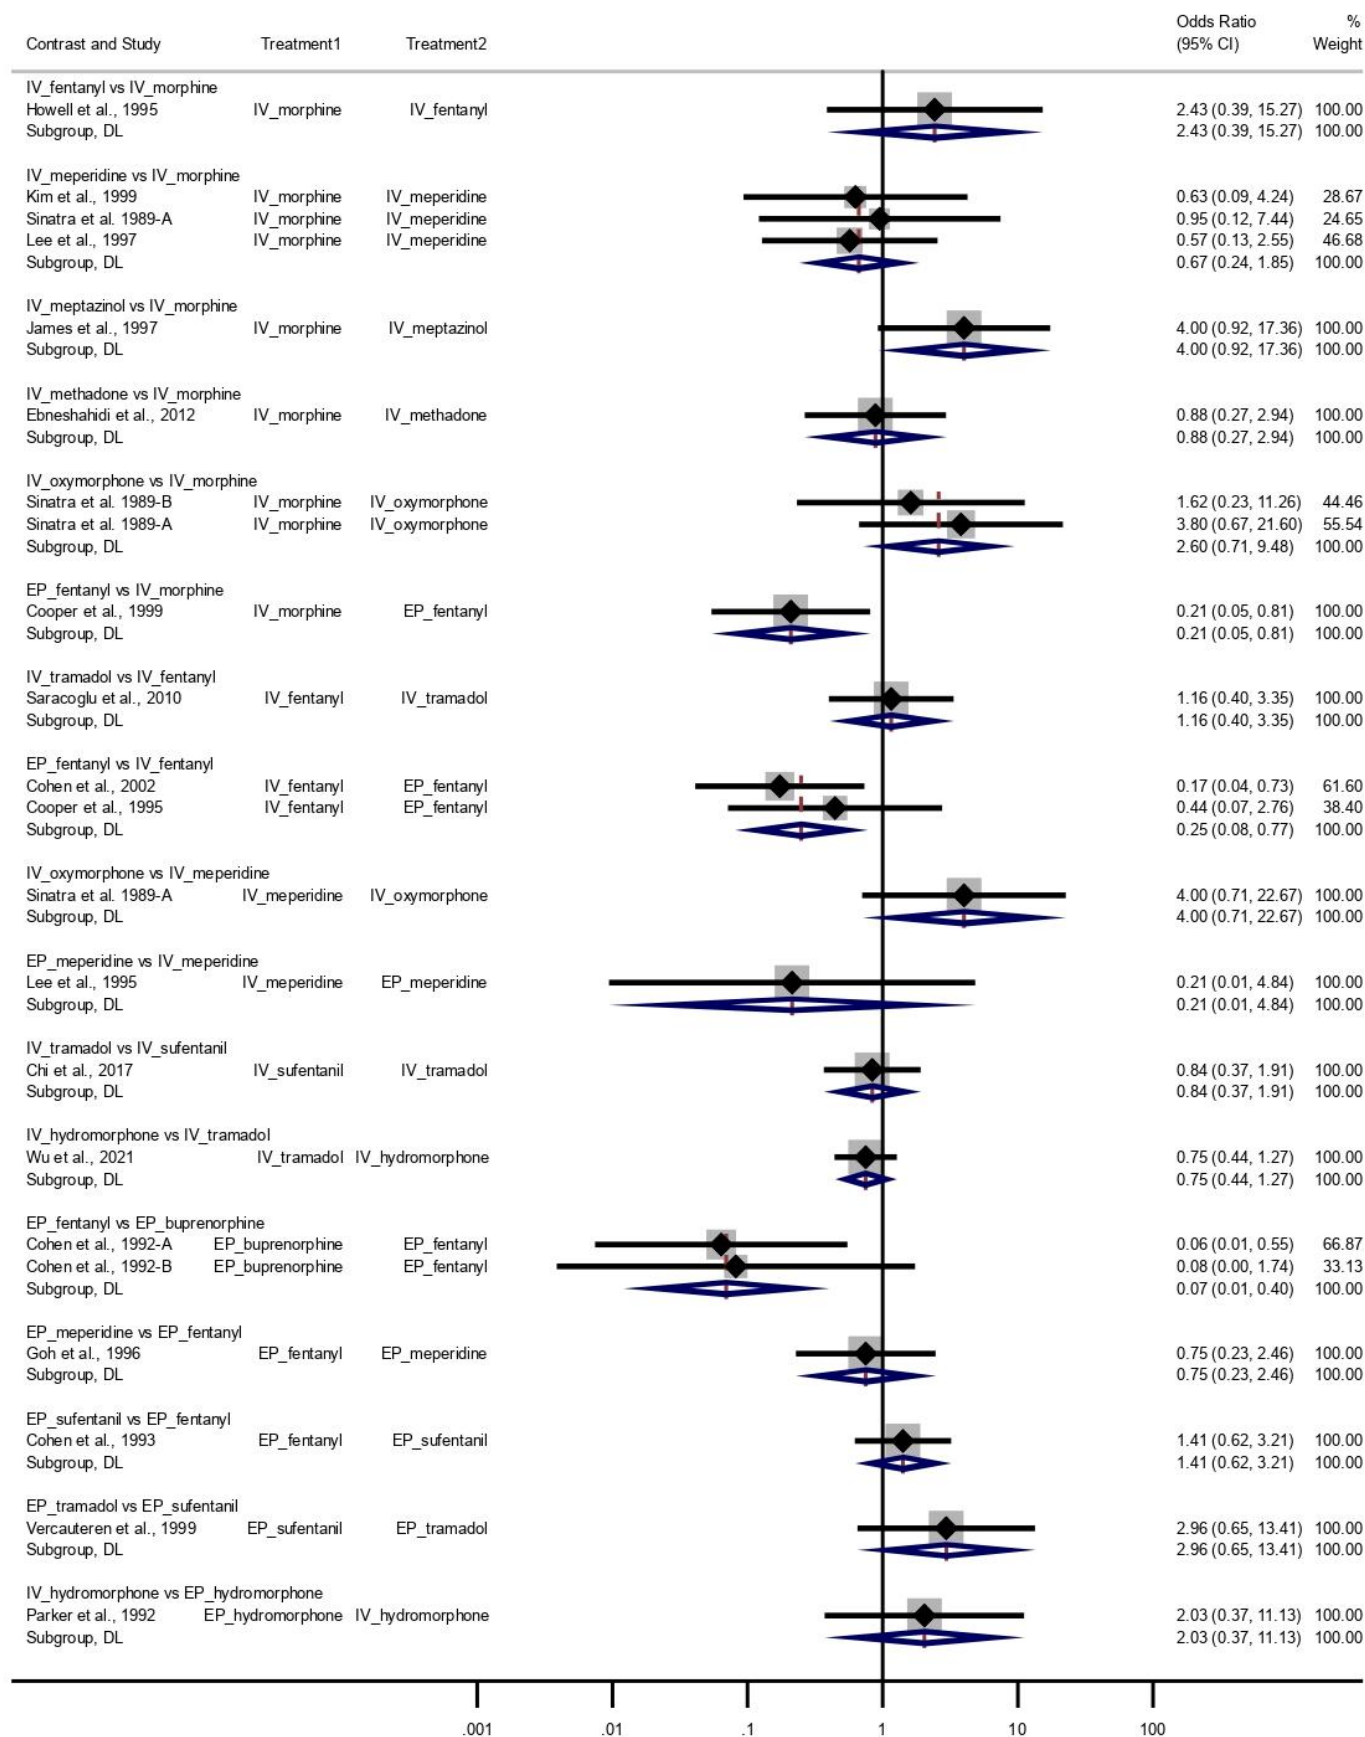

**Supplementary Figure S9.** Forest plots from pairwise comparisons of treatment agents on nausea/vomiting. The prefix “IV\_” denotes IVPCA, and the prefix “EP\_” denotes PCEA. CI, confidence interval.

A.

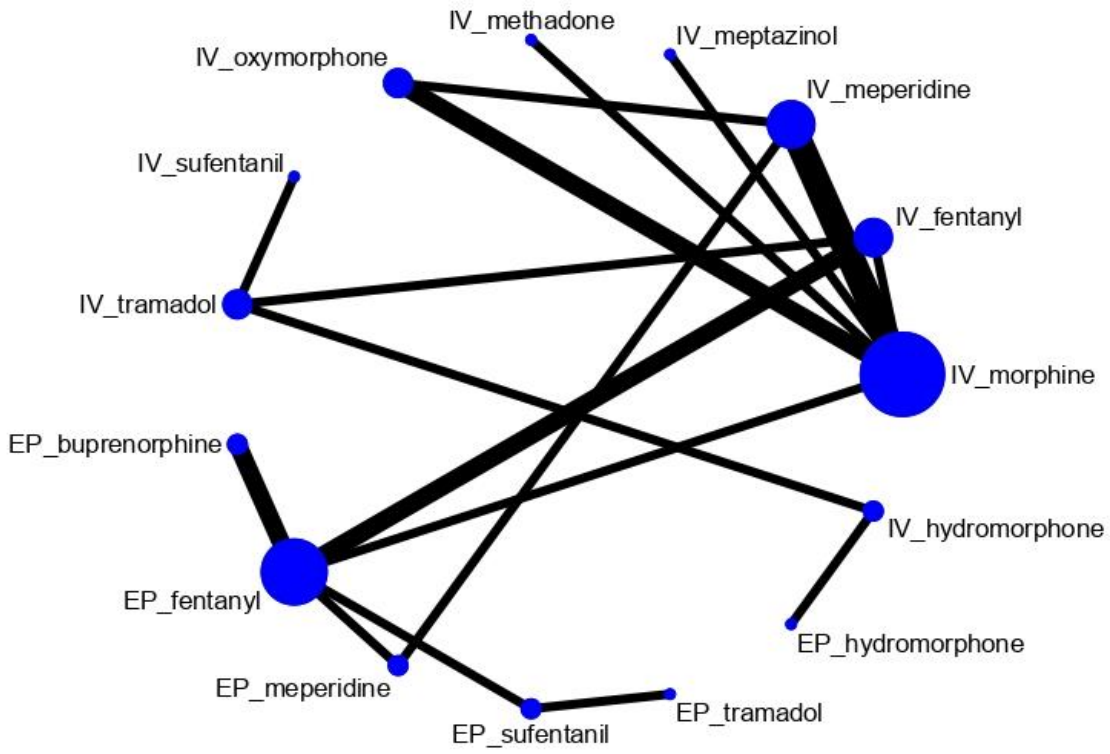

B.

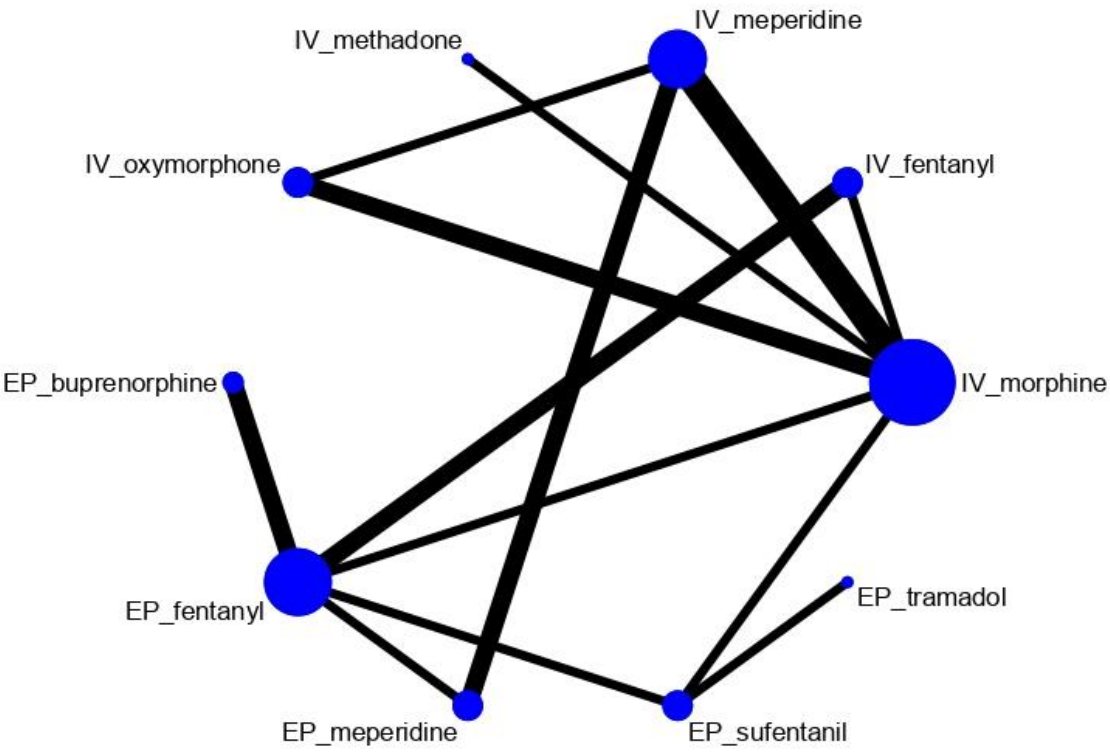

C.

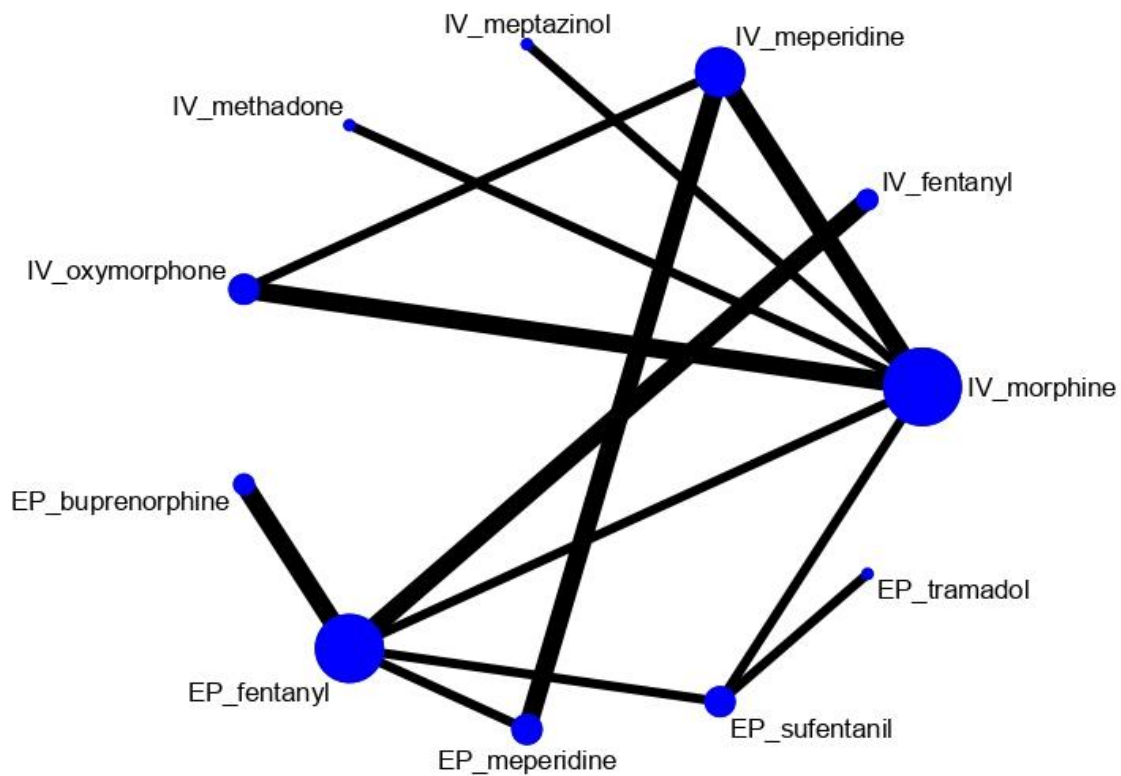

**Supplementary Figure S10.** Network treatment comparisons for studies investigating the effects of opioids on adverse effects

(A) nausea/vomiting; (B) pruritus; (C) sedation/drowsiness. Each node represents a treatment, the size of which corresponds to the number of patients studied with each treatment. Treatments that are compared directly are joined with a line, the thickness of which corresponds to the number of trials that assessed the comparisons. The prefix “IV\_” denotes IVPCA, and the prefix “EP\_” denotes PCEA.

**Supplementary Table S7.** Comparative efficacy of treatments on nausea/vomiting

|                       |                       |                         |                         |                        |                          |                         |                       |                           |                        |                     |  |  |  |                   |
|-----------------------|-----------------------|-------------------------|-------------------------|------------------------|--------------------------|-------------------------|-----------------------|---------------------------|------------------------|---------------------|--|--|--|-------------------|
| <b>IVPCA morphine</b> | 0.41<br>(0.07, 2.59)  | 1.50 (0.54, 4.17)       | 0.25 (0.06, 1.09)       | 1.13 (0.34, 3.77)      | 0.38 (0.11, 1.41)        |                         |                       |                           | 4.78<br>(1.24, 18.49)  |                     |  |  |  |                   |
| 0.74 (0.21, 2.57)     | <b>IVPCA fentanyl</b> |                         |                         |                        |                          |                         | 0.86<br>(0.30, 2.50)  | .                         | 4.02<br>(1.30, 12.45)  |                     |  |  |  |                   |
| 1.54 (0.59, 4.03)     | 2.08<br>(0.45, 9.60)  | <b>IVPCA meperidine</b> |                         |                        | 0.25 (0.04, 1.42)        |                         |                       |                           |                        | 4.67 (0.21, 111.11) |  |  |  |                   |
| 0.25 (0.06, 1.09)     | 0.34<br>(0.05, 2.32)  | 0.16 (0.03, 0.94)       | <b>IVPCA meptazinol</b> |                        |                          |                         |                       |                           |                        |                     |  |  |  |                   |
| 1.13 (0.34, 3.77)     | 1.53<br>(0.27, 8.64)  | 0.73 (0.16, 3.42)       | 4.52 (0.68, 30.19)      | <b>IVPCA methadone</b> |                          |                         |                       |                           |                        |                     |  |  |  |                   |
| 0.40 (0.12, 1.30)     | 0.54<br>(0.10, 2.96)  | 0.26 (0.07, 0.96)       | 1.60 (0.24, 10.50)      | 0.35 (0.07, 1.90)      | <b>IVPCA oxymorphone</b> |                         |                       |                           |                        |                     |  |  |  |                   |
| 0.54 (0.09, 3.35)     | 0.72<br>(0.19, 2.78)  | 0.35 (0.05, 2.66)       | 2.14 (0.20, 22.42)      | 0.47 (0.05, 4.24)      | 1.34 (0.15, 11.71)       | <b>IVPCA sufentanil</b> | 1.19<br>(0.52, 2.73)  |                           |                        |                     |  |  |  |                   |
| 0.64 (0.12, 3.28)     | 0.86<br>(0.30, 2.50)  | 0.41 (0.06, 2.67)       | 2.55 (0.28, 23.03)      | 0.56 (0.07, 4.31)      | 1.60 (0.22, 11.87)       | 1.19 (0.52, 2.73)       | <b>IVPCA tramadol</b> |                           |                        |                     |  |  |  | 1.33 (0.79, 2.27) |
| 0.26 (0.03, 2.04)     | 0.35<br>(0.05, 2.64)  | 0.17 (0.02, 1.57)       | 1.03 (0.08, 13.01)      | 0.23 (0.02, 2.49)      | 0.64 (0.06, 6.87)        | 0.48 (0.04, 5.48)       | 0.40<br>(0.04, 3.98)  | <b>PCEA buprenorphine</b> | 14.29<br>(2.48, 83.33) |                     |  |  |  |                   |

|                    |                    |                    |                      |                    |                     |                    |                    |                      |                          |                            |                            |                          |                               |                                |
|--------------------|--------------------|--------------------|----------------------|--------------------|---------------------|--------------------|--------------------|----------------------|--------------------------|----------------------------|----------------------------|--------------------------|-------------------------------|--------------------------------|
| 3.71 (1.25, 11.01) | 5.01 (1.83, 13.75) | 2.41 (0.60, 9.60)  | 14.83 (2.38, 92.21)  | 3.28 (0.65, 16.60) | 9.27 (1.90, 45.21)  | 6.93 (1.29, 37.23) | 5.80 (1.34, 25.11) | 14.39 (2.48, 83.41)  | <b>PCEA<br/>fentanyl</b> | 1.33 (0.41, 4.39)          | 0.71 (0.31, 1.61)          |                          |                               |                                |
| 5.18 (1.19, 22.65) | 7.01 (1.59, 30.98) | 3.37 (0.65, 17.37) | 20.74 (2.59, 166.12) | 4.58 (0.68, 30.74) | 12.97 (2.04, 82.65) | 9.69 (1.31, 71.90) | 8.12 (1.31, 50.41) | 20.12 (2.50, 162.13) | 1.40 (0.45, 4.31)        | <b>PCEA<br/>meperidine</b> |                            |                          |                               |                                |
| 2.62 (0.67, 10.25) | 3.55 (0.97, 13.02) | 1.70 (0.34, 8.51)  | 10.49 (1.41, 77.80)  | 2.32 (0.38, 14.29) | 6.56 (1.10, 39.08)  | 4.90 (0.75, 31.84) | 4.11 (0.77, 22.02) | 10.18 (1.46, 70.82)  | 0.71 (0.31, 1.61)        | 0.51 (0.13, 2.04)          | <b>PCEA<br/>sufentanil</b> | 0.34 (0.07, 1.54)        |                               |                                |
| 0.89 (0.12, 6.80)  | 1.20 (0.16, 8.82)  | 0.58 (0.06, 5.24)  | 3.55 (0.29, 43.69)   | 0.78 (0.07, 8.35)  | 2.22 (0.21, 23.03)  | 1.66 (0.15, 18.39) | 1.39 (0.15, 13.31) | 3.44 (0.29, 40.30)   | 0.24 (0.04, 1.34)        | 0.17 (0.02, 1.34)          | 0.34 (0.07, 1.54)          | <b>PCEA<br/>tramadol</b> |                               |                                |
| 1.74 (0.15, 19.49) | 2.35 (0.30, 18.65) | 1.13 (0.09, 14.80) | 6.94 (0.41, 117.55)  | 1.53 (0.10, 22.86) | 4.34 (0.30, 63.44)  | 3.24 (0.46, 23.08) | 2.72 (0.46, 16.12) | 6.74 (0.37, 122.29)  | 0.47 (0.05, 4.70)        | 0.33 (0.03, 4.29)          | 0.66 (0.06, 7.65)          | 1.96 (0.11, 34.73)       | <b>PCEA<br/>hydromorphone</b> | 0.49 (0.09, 2.69)              |
| 0.85 (0.15, 4.77)  | 1.15 (0.35, 3.78)  | 0.55 (0.08, 3.83)  | 3.41 (0.36, 32.76)   | 0.75 (0.09, 6.16)  | 2.13 (0.27, 16.99)  | 1.59 (0.60, 4.25)  | 1.34 (0.79, 2.27)  | 3.31 (0.32, 34.66)   | 0.23 (0.05, 1.09)        | 0.16 (0.02, 1.10)          | 0.33 (0.06, 1.89)          | 0.96 (0.09, 9.79)        | 0.49 (0.09, 2.69)             | <b>IVPCA<br/>hydromorphone</b> |

Comparisons between treatments should be read from left to right, and the estimate is in the cell in common between the column-defining treatment and the row-defining treatment. The network estimates from network meta-analysis are in the lower triangle, and the direct treatment estimates from pairwise comparisons are in the upper triangle. Estimates are presented as odds ratio (95% confidence interval).



A.

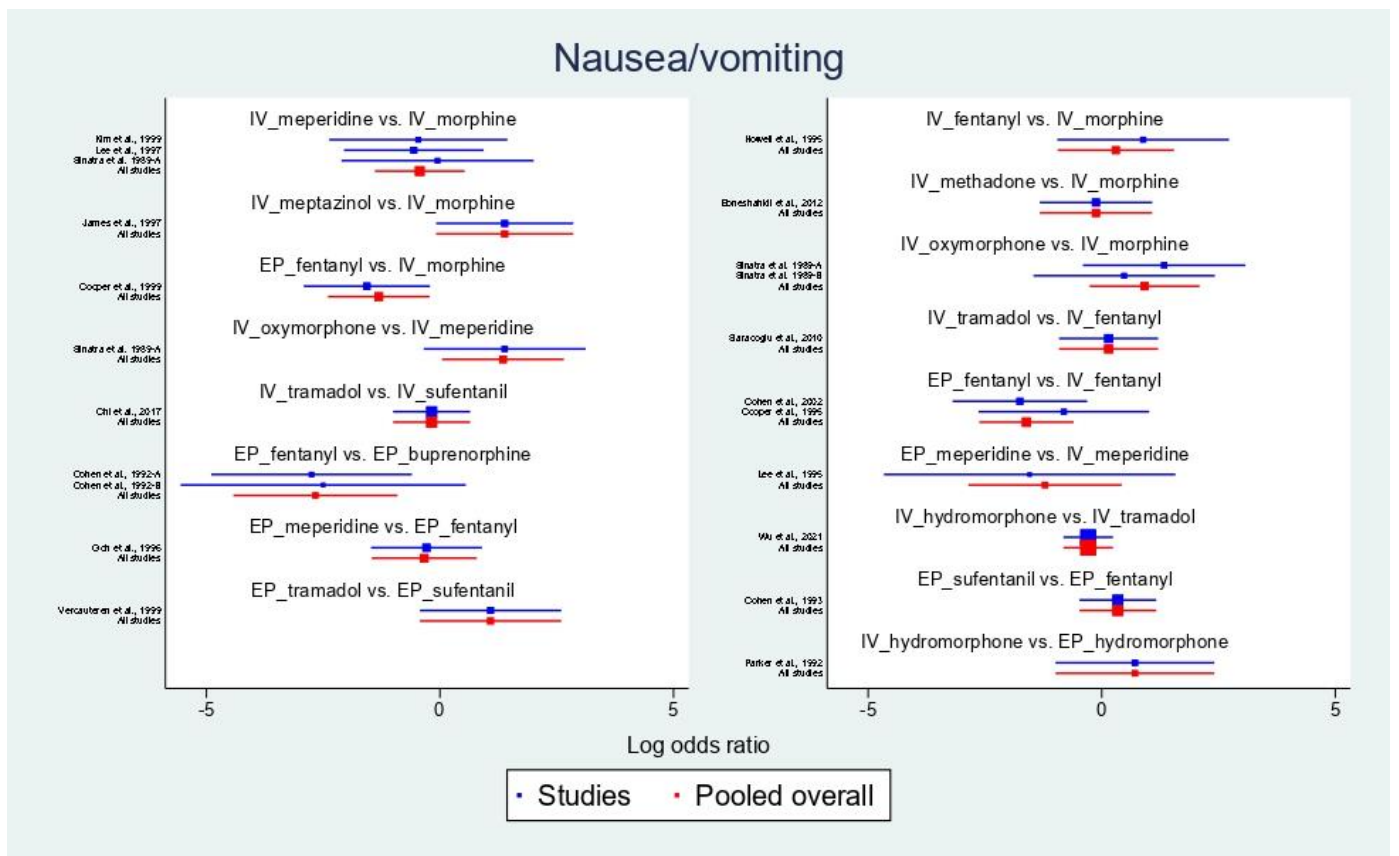

B.

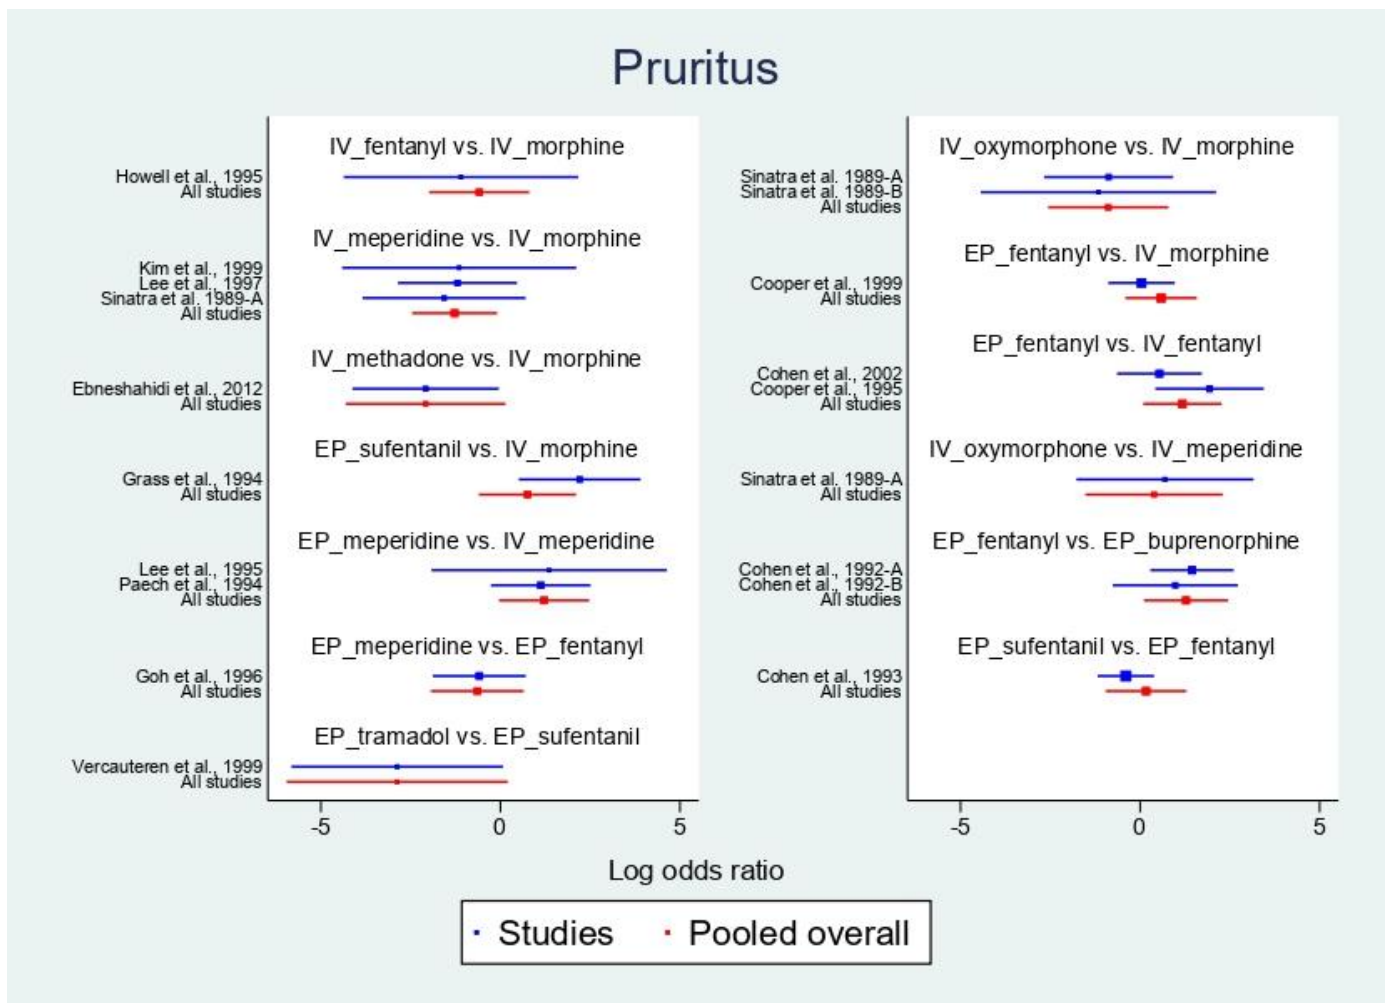

C.

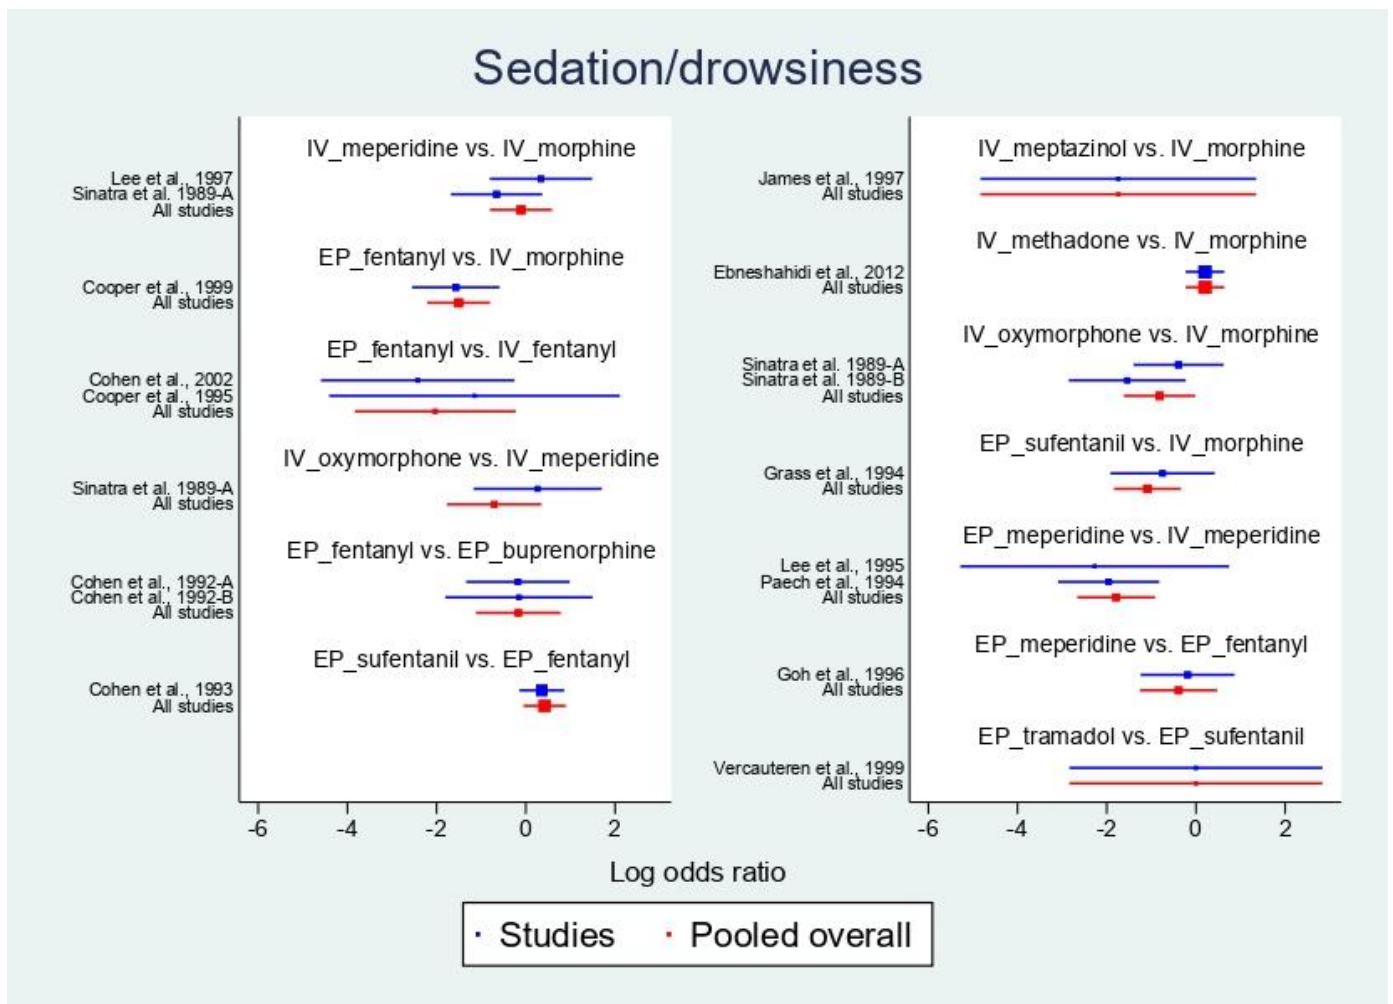

**Supplementary Figure S11.** Network meta-analysis forest plots of adverse effects

(A) nausea/vomiting; (B) pruritus; (C) sedation/drowsiness. The blue dots and lines indicate the studies contributing the direct evidence. The red dots and lines indicate the pooled overall network estimates of the treatment effects. The prefix “IV\_” denotes IVPCA, and the prefix “EP\_” denotes PCEA.

A.

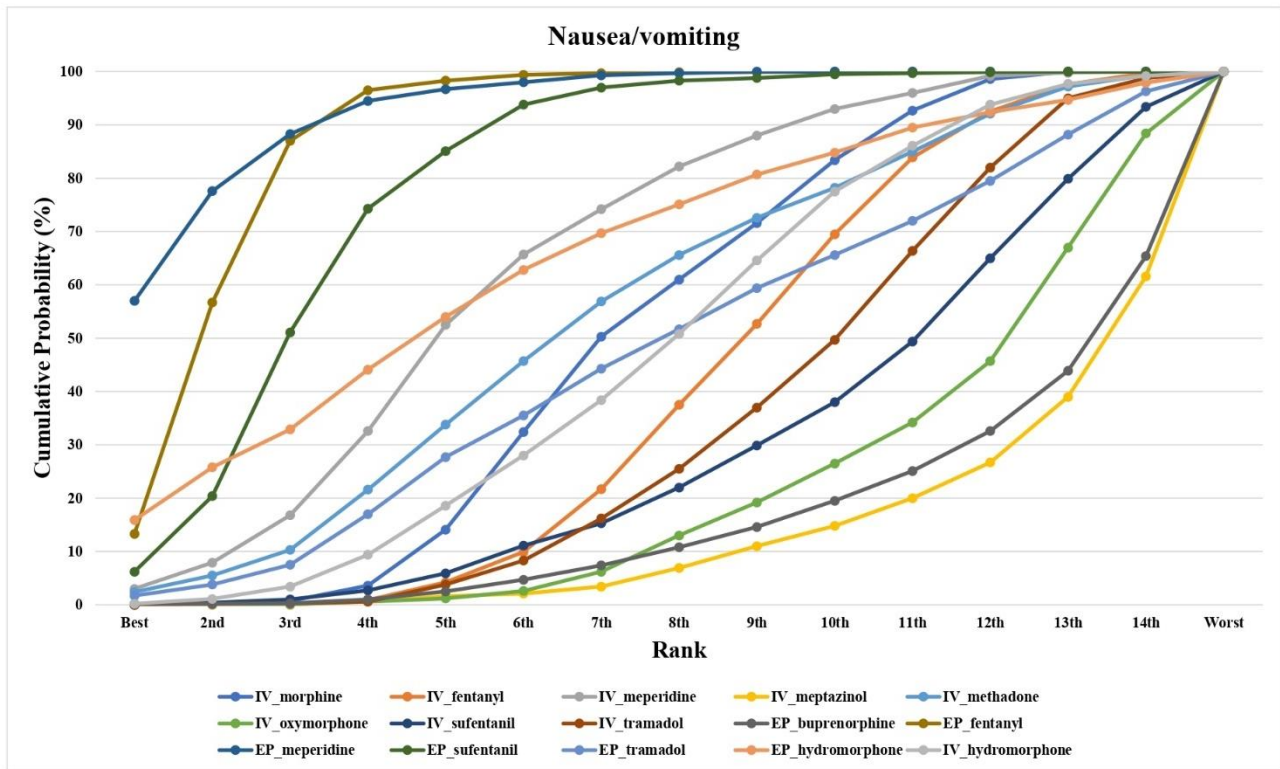

B.

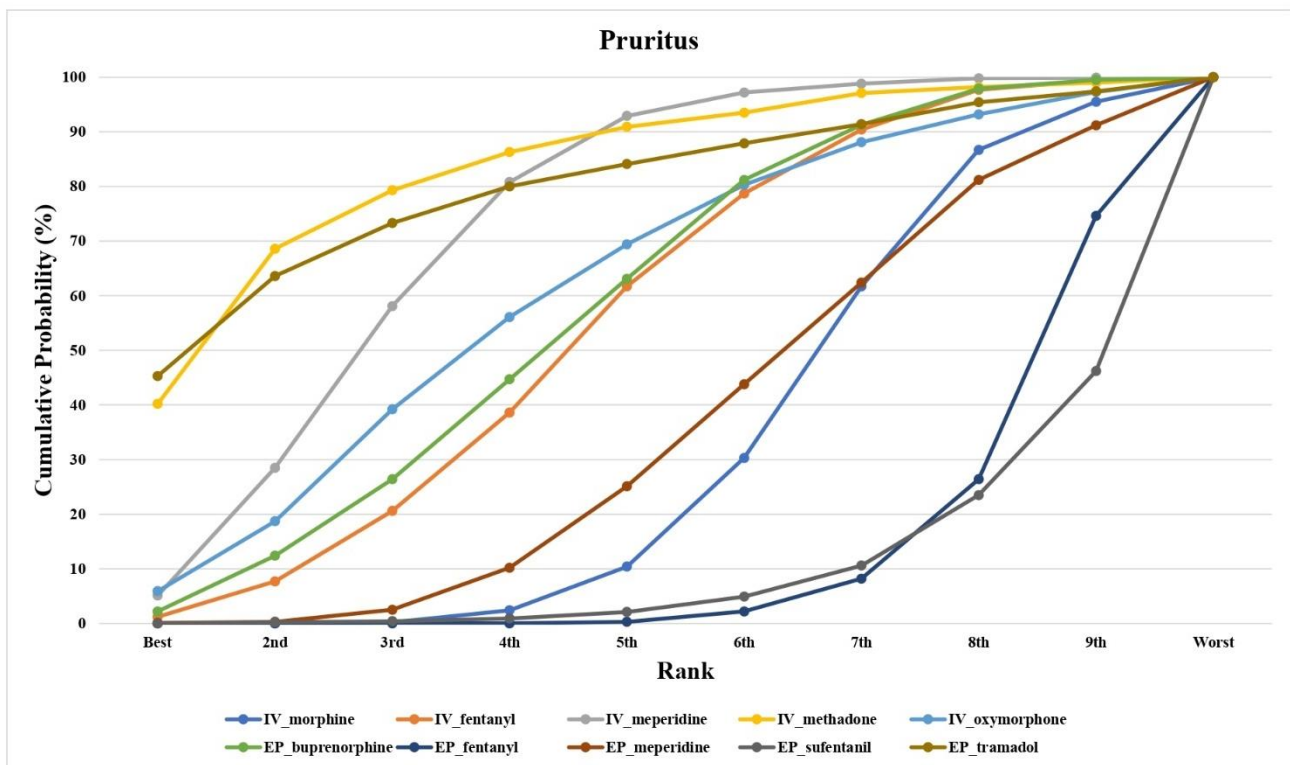

C.

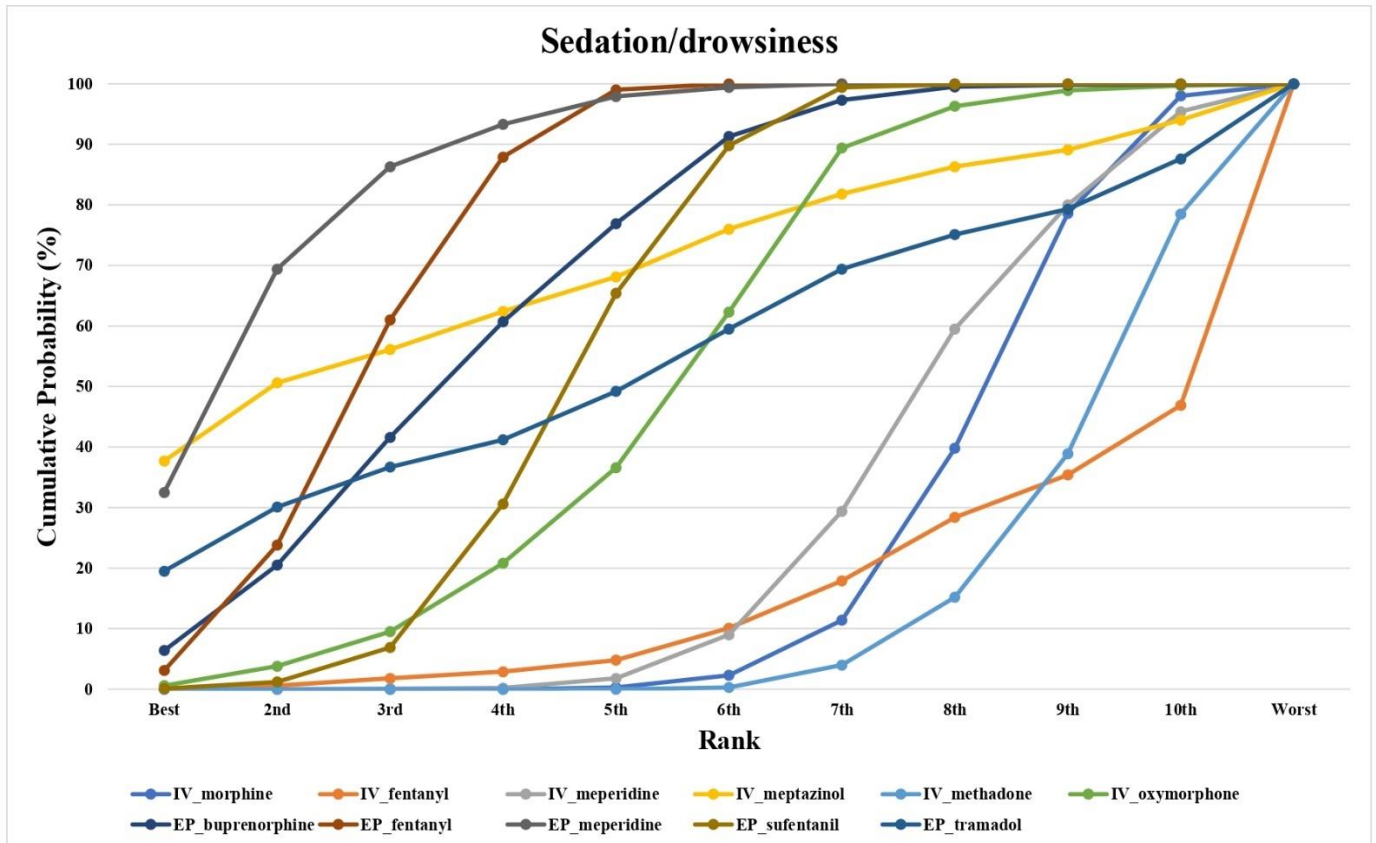

**Supplementary Figure S12.** Cumulative ranking probability of the effects of each treatment on adverse effects

(A) nausea/vomiting; (B) pruritus; (C) sedation/drowsiness. The prefix “IV\_” denotes IVPCA, and the prefix “EP\_” denotes PCEA.

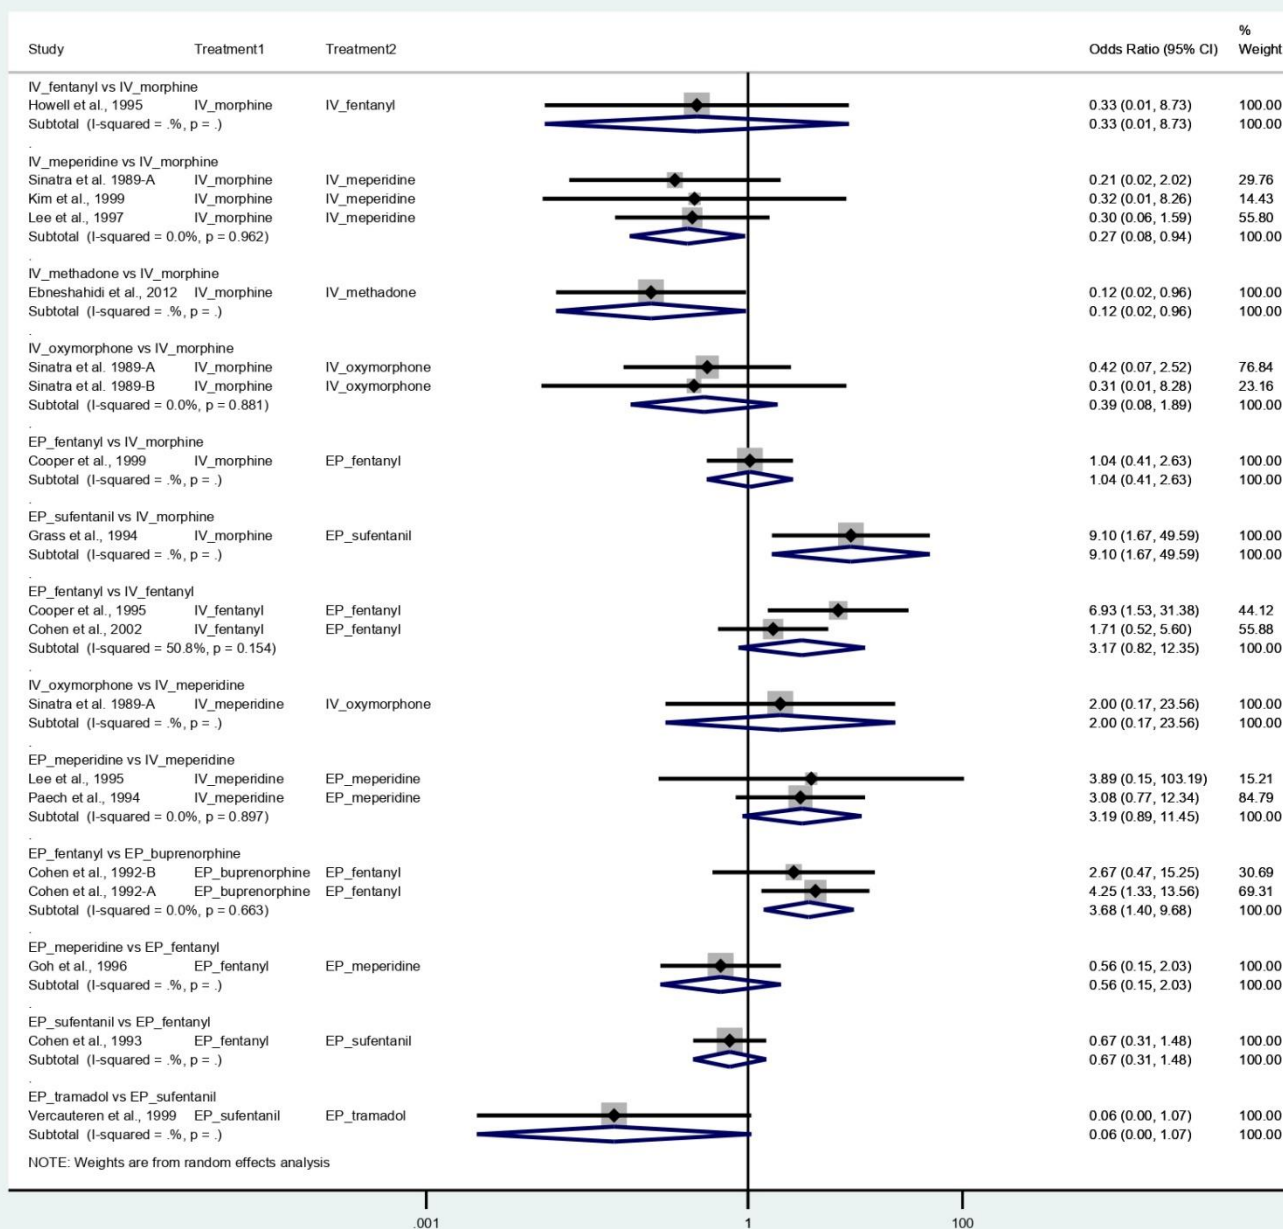

**Supplementary Figure S13.** Forest plots from pairwise comparisons of treatment agents on pruritus. The prefix “IV\_” denotes IVPCA, and the prefix “EP\_” denotes PCEA. CI, confidence interval.

**Supplementary Table S8.** Comparative efficacy of treatments on pruritus

|                       |                       |                         |                        |                          |                           |                      |                        |                        |                      |
|-----------------------|-----------------------|-------------------------|------------------------|--------------------------|---------------------------|----------------------|------------------------|------------------------|----------------------|
| <b>IVPCA morphine</b> | 3.00 (0.11, 76.92)    | 3.68 (1.06, 12.66)      | 8.00 (1.04, 62.50)     | 2.56 (0.53, 12.35)       |                           | 0.96 (0.38, 2.43)    |                        | 0.11 (0.02, 0.60)      |                      |
| 1.81 (0.45, 7.28)     | <b>IVPCA fentanyl</b> |                         |                        |                          |                           | 0.32 (0.08, 1.23)    |                        |                        |                      |
| 3.58 (1.09, 11.69)    | 1.98 (0.37, 10.72)    | <b>IVPCA meperidine</b> |                        | 0.50 (0.04, 5.88)        |                           |                      | 0.31 (0.09, 1.13)      |                        |                      |
| 8.03 (0.87, 74.43)    | 4.44 (0.32, 61.47)    | 2.24 (0.18, 27.95)      | <b>IVPCA methadone</b> |                          |                           |                      |                        |                        |                      |
| 2.42 (0.45, 12.98)    | 1.34 (0.16, 11.62)    | 0.68 (0.10, 4.59)       | 0.30 (0.02, 4.91)      | <b>IVPCA oxymorphone</b> |                           |                      |                        |                        |                      |
| 2.00 (0.43, 9.39)     | 1.11 (0.22, 5.54)     | 0.56 (0.09, 3.38)       | 0.25 (0.02, 3.75)      | 0.82 (0.09, 7.89)        | <b>PCEA buprenorphine</b> | 0.27 (0.1, 0.71)     |                        |                        |                      |
| 0.56 (0.21, 1.51)     | 0.31 (0.10, 0.92)     | 0.16 (0.04, 0.60)       | 0.07 (0.01, 0.79)      | 0.23 (0.03, 1.57)        | 0.28 (0.09, 0.90)         | <b>PCEA fentanyl</b> | 1.8 (0.49, 6.58)       | 1.48 (0.68, 3.25)      |                      |
| 1.06 (0.26, 4.23)     | 0.59 (0.11, 3.10)     | 0.30 (0.08, 1.04)       | 0.13 (0.01, 1.82)      | 0.44 (0.05, 3.55)        | 0.53 (0.09, 3.05)         | 1.90 (0.52, 6.96)    | <b>PCEA meperidine</b> |                        |                      |
| 0.47 (0.12, 1.82)     | 0.26 (0.05, 1.28)     | 0.13 (0.02, 0.71)       | 0.06 (0.00, 0.79)      | 0.19 (0.02, 1.65)        | 0.24 (0.05, 1.18)         | 0.85 (0.27, 2.61)    | 0.44 (0.08, 2.37)      | <b>PCEA sufentanil</b> | 17.86 (0.93, 333.33) |
| 8.34 (0.29, 241.11)   | 4.62 (0.14, 147.73)   | 2.33 (0.07, 77.90)      | 1.04 (0.02, 58.72)     | 3.44 (0.08, 146.09)      | 4.17 (0.13, 134.80)       | 15.00 (0.57, 397.74) | 7.88 (0.24, 261.96)    | 17.73 (0.82, 385.32)   | <b>PCEA tramadol</b> |

Comparisons between treatments should be read from left to right, and the estimate is in the cell in common between the column-defining treatment and the row-defining treatment. The network estimates from network meta-analysis are in the lower triangle, and the direct treatment estimates from pairwise comparisons are in the upper triangle. Estimates are presented as odds ratio (95% confidence interval).

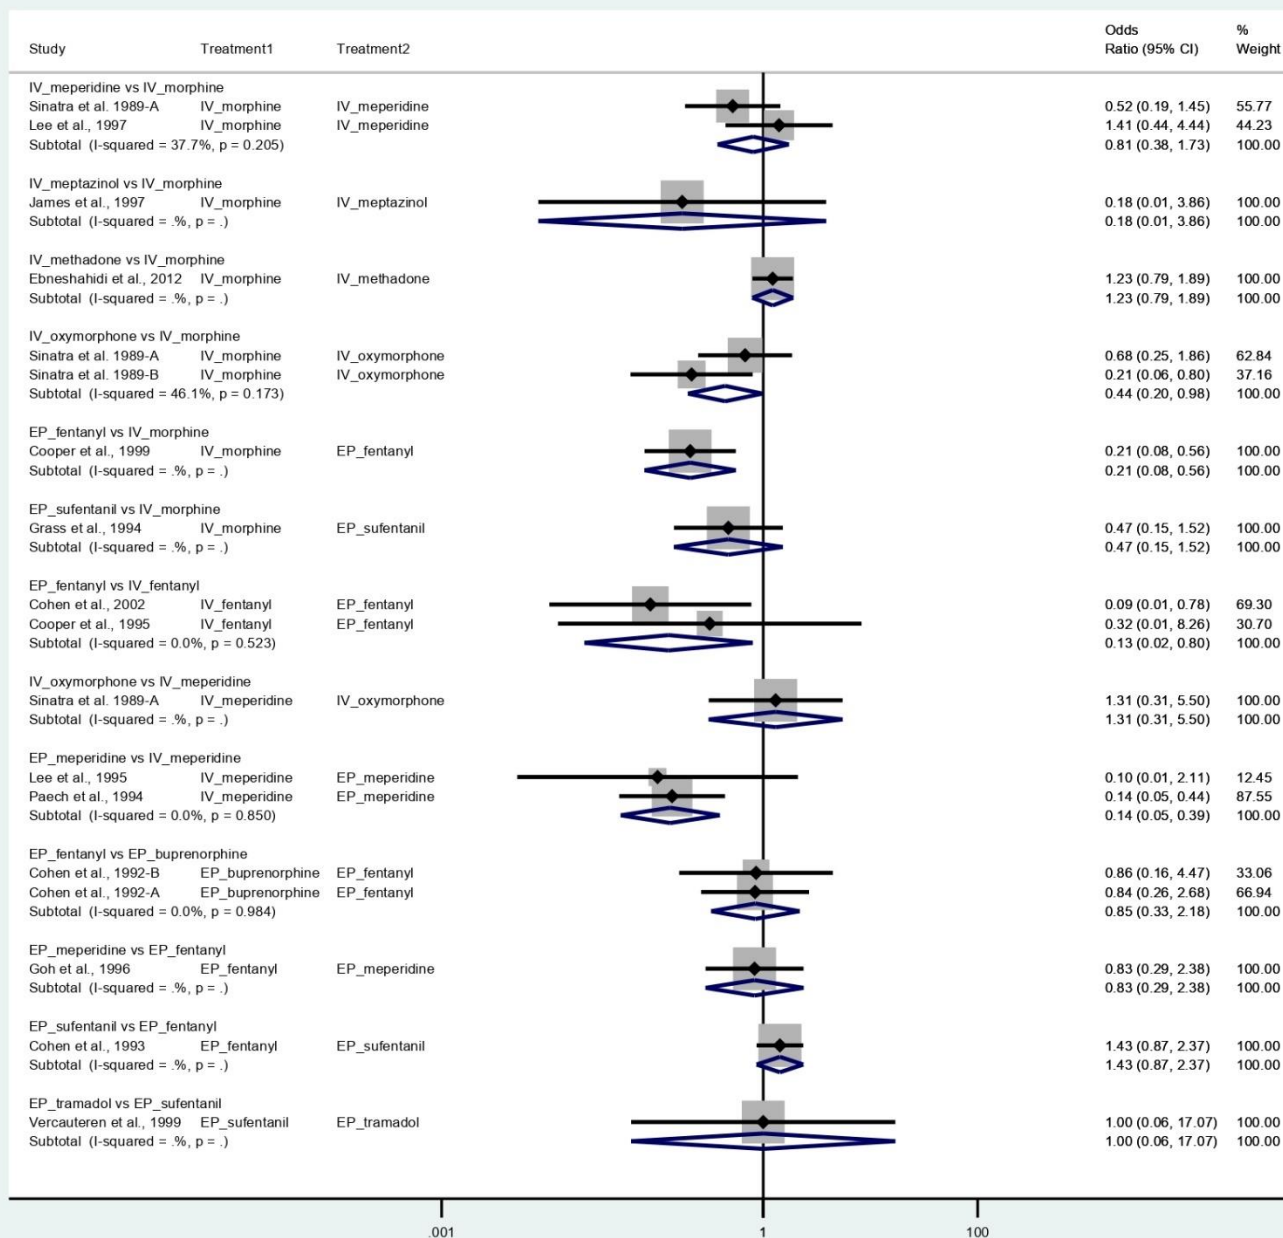

**Supplementary Figure S14.** Forest plots from pairwise comparisons of treatment agents on sedation/drowsiness

The prefix “IV\_” denotes IVPCA, and the prefix “EP\_” denotes PCEA. CI, confidence interval.

**Supplementary Table S9.** Comparative efficacy of treatments on sedation/drowsiness

|                       |                       |                         |                         |                        |                          |                           |                      |                        |                        |                      |
|-----------------------|-----------------------|-------------------------|-------------------------|------------------------|--------------------------|---------------------------|----------------------|------------------------|------------------------|----------------------|
| <b>IVPCA morphine</b> |                       | 1.24 (0.58, 2.67)       | 5.68 (0.26, 125)        | 0.82 (0.53, 1.26)      | 2.26 (1.02, 5.03)        |                           | 4.81 (1.80, 12.82)   |                        | 2.11 (0.66, 6.80)      |                      |
| 0.59 (0.09, 4.11)     | <b>IVPCA fentanyl</b> |                         |                         |                        |                          |                           | 7.63 (1.25, 45.45)   |                        |                        |                      |
| 1.11 (0.56, 2.24)     | 1.88 (0.25, 14.06)    | <b>IVPCA meperidine</b> |                         |                        | 0.77 (0.18, 3.23)        |                           |                      | 7.35 (2.54, 21.28)     |                        |                      |
| 5.70 (0.26, 125.36)   | 9.64 (0.25, 370.36)   | 5.12 (0.22, 121.62)     | <b>IVPCA meptazinol</b> |                        |                          |                           |                      |                        |                        |                      |
| 0.82 (0.53, 1.26)     | 1.38 (0.19, 10.07)    | 0.73 (0.32, 1.67)       | 0.14 (0.01, 3.25)       | <b>IVPCA methadone</b> |                          |                           |                      |                        |                        |                      |
| 2.26 (1.02, 5.03)     | 3.83 (0.47, 31.16)    | 2.03 (0.70, 5.87)       | 0.40 (0.02, 9.67)       | 2.77 (1.11, 6.89)      | <b>IVPCA oxymorphone</b> |                           |                      |                        |                        |                      |
| 3.82 (1.17, 12.45)    | 6.45 (0.84, 49.66)    | 3.43 (0.94, 12.51)      | 0.67 (0.02, 18.33)      | 4.68 (1.33, 16.49)     | 1.69 (0.40, 7.03)        | <b>PCEA buprenorphine</b> | 1.18 (0.46, 3.06)    |                        |                        |                      |
| 4.51 (2.23, 9.14)     | 7.63 (1.25, 46.48)    | 4.05 (1.68, 9.78)       | 0.79 (0.03, 18.87)      | 5.53 (2.42, 12.67)     | 2.00 (0.69, 5.80)        | 1.18 (0.46, 3.06)         | <b>PCEA fentanyl</b> | 1.20 (0.42, 3.45)      | 0.70 (0.42, 1.15)      |                      |
| 6.66 (2.64, 16.82)    | 11.27 (1.52, 83.55)   | 5.98 (2.51, 14.29)      | 1.17 (0.05, 29.47)      | 8.17 (2.94, 22.72)     | 2.95 (0.87, 10.02)       | 1.75 (0.48, 6.31)         | 1.48 (0.62, 3.51)    | <b>PCEA meperidine</b> |                        |                      |
| 2.96 (1.40, 6.29)     | 5.01 (0.77, 32.43)    | 2.66 (1.04, 6.79)       | 0.52 (0.02, 12.52)      | 3.63 (1.52, 8.67)      | 1.31 (0.44, 3.93)        | 0.78 (0.27, 2.24)         | 0.66 (0.41, 1.05)    | 0.44 (0.17, 1.16)      | <b>PCEA sufentanil</b> | 1.00 (0.06, 16.95)   |
| 2.96 (0.16, 55.78)    | 5.01 (0.17, 149.61)   | 2.66 (0.13, 52.78)      | 0.52 (0.01, 36.92)      | 3.63 (0.19, 70.59)     | 1.31 (0.06, 27.45)       | 0.78 (0.04, 16.05)        | 0.66 (0.04, 11.65)   | 0.44 (0.02, 8.87)      | 1.00 (0.06, 17.07)     | <b>PCEA tramadol</b> |

Comparisons between treatments should be read from left to right, and the estimate is in the cell in common between the column-defining treatment and the row-defining treatment. The network estimates from network meta-analysis are in the lower triangle, and the direct treatment estimates from pairwise comparisons are in the upper triangle. Estimates are presented as odds ratio (95% confidence interval).



A.

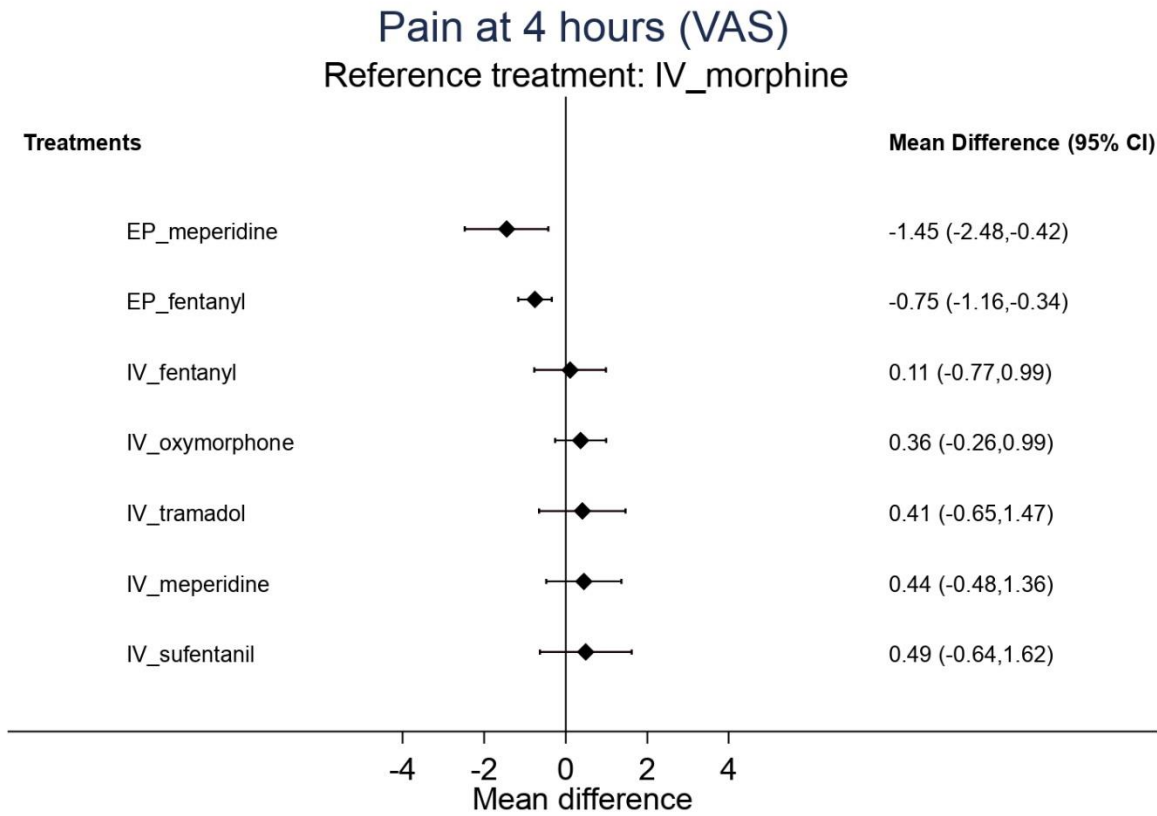

B.

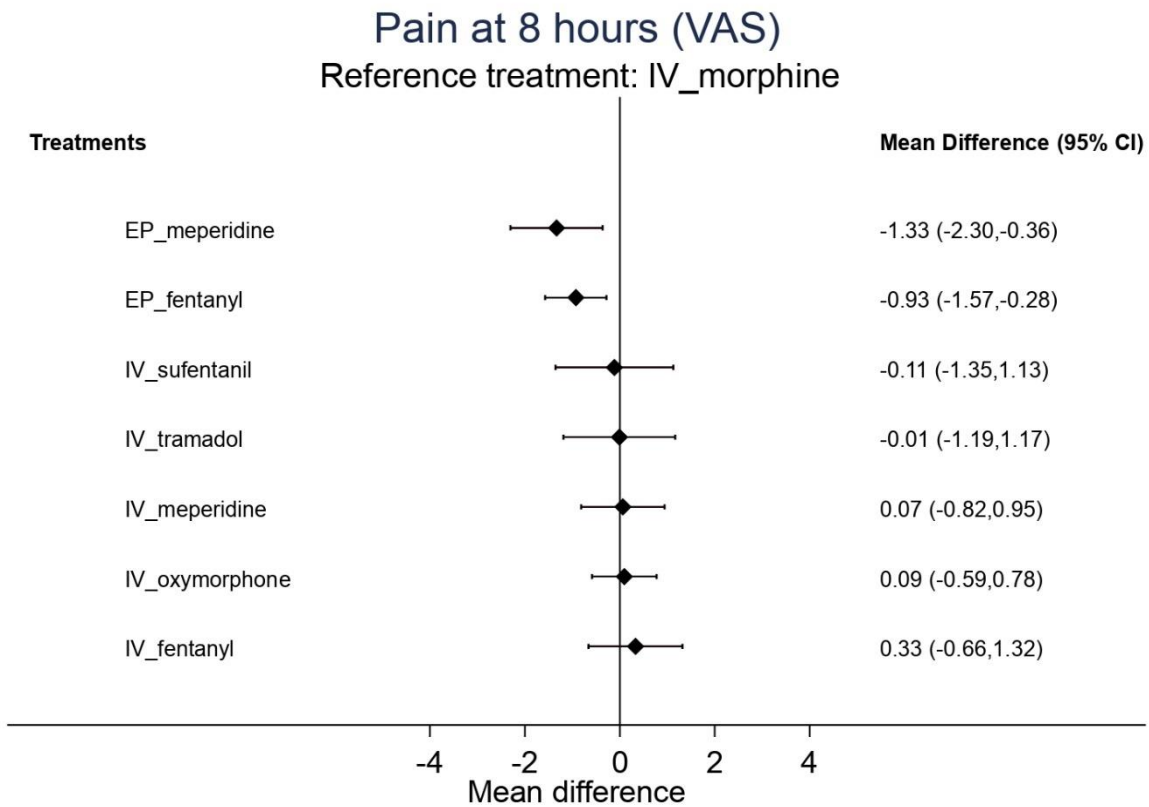

C.

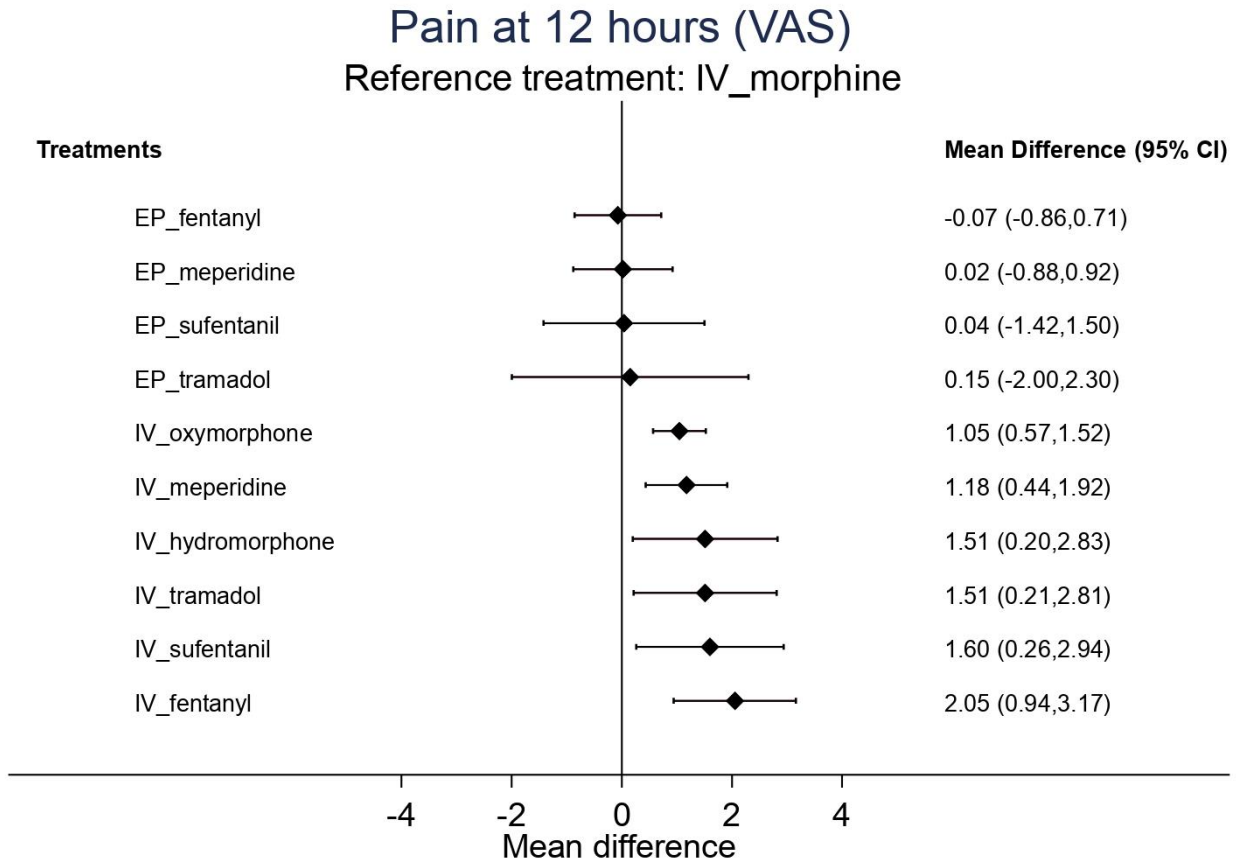

**Supplementary Figure S15.** Sensitivity analysis of pain intensity

(A) Forest plot of the effects of each treatment relative to IVPCA morphine at 4 hours after surgery. (B) Forest plot of the effects of each treatment relative to IVPCA morphine at 8 hours after surgery. (C) Forest plot of the effects of each treatment relative to IVPCA morphine at 12 hours after surgery.

A.

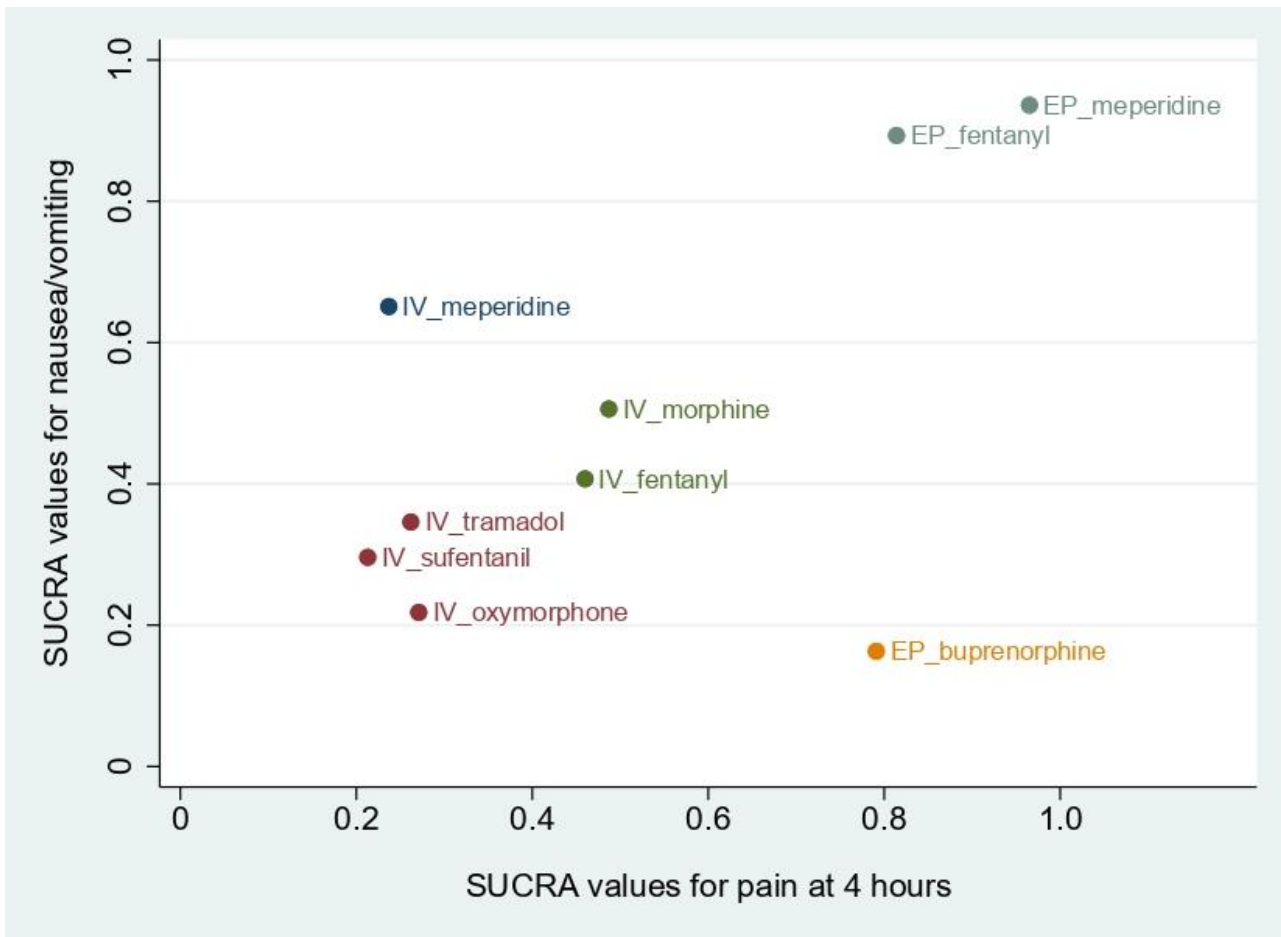

B.

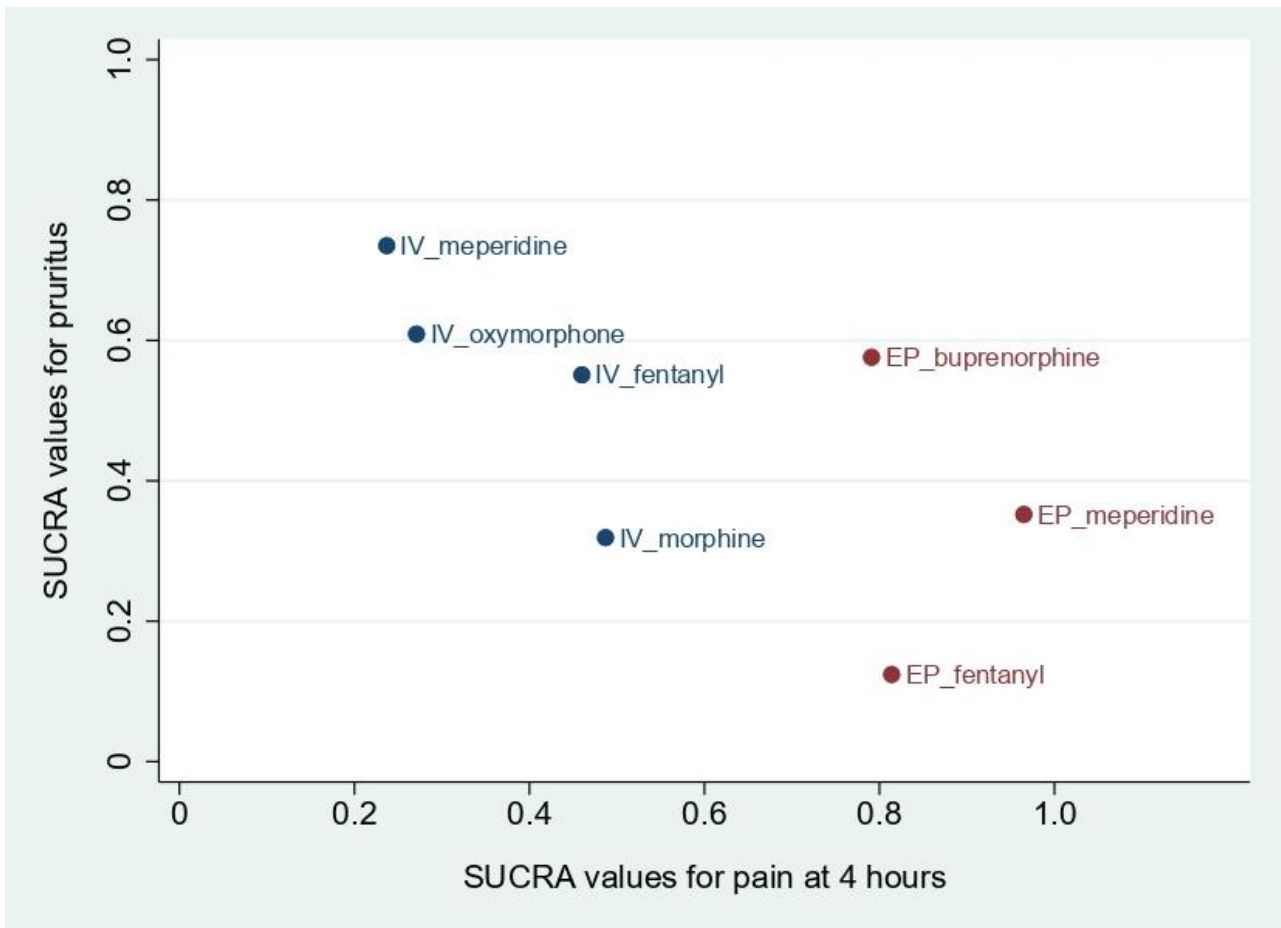

C.

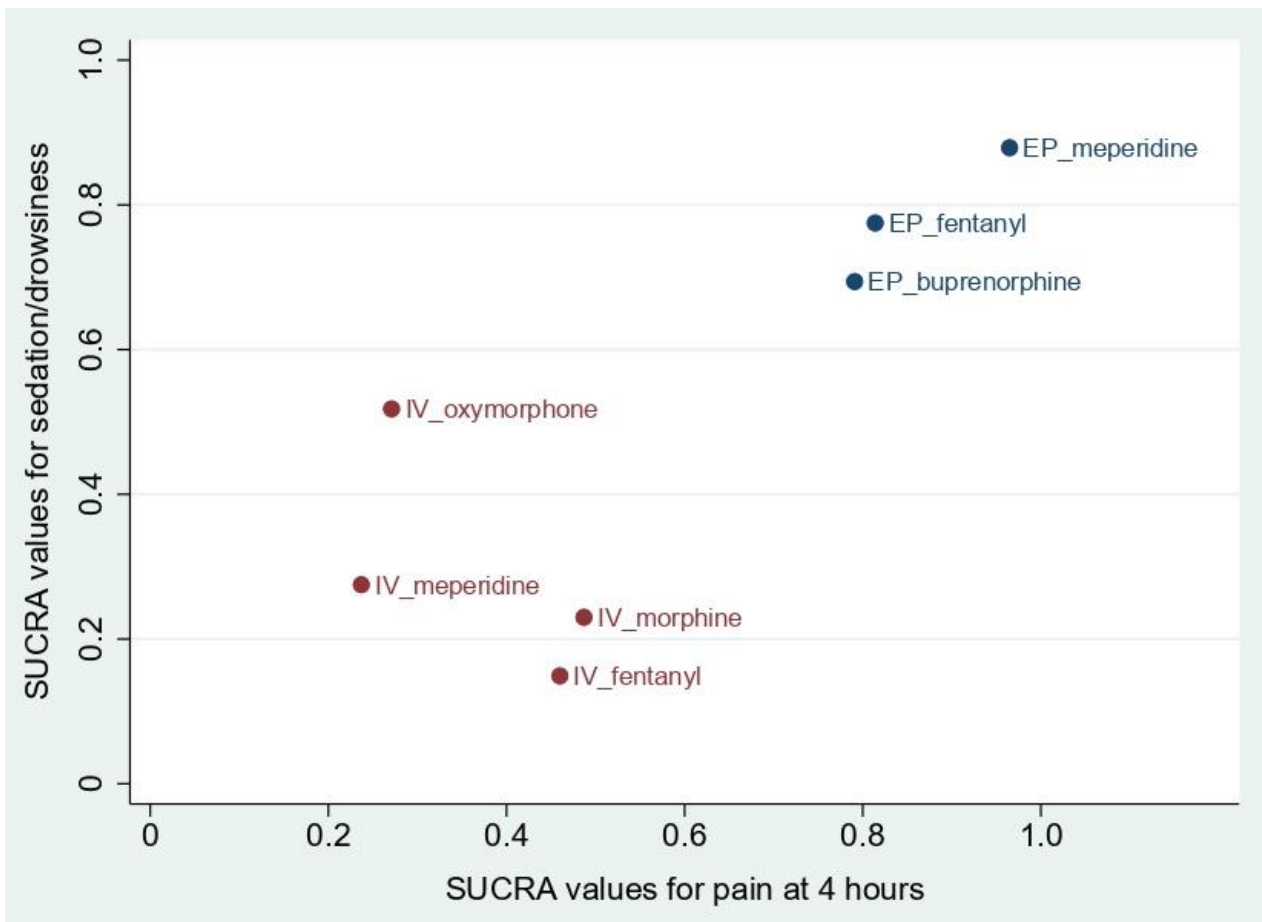

D.

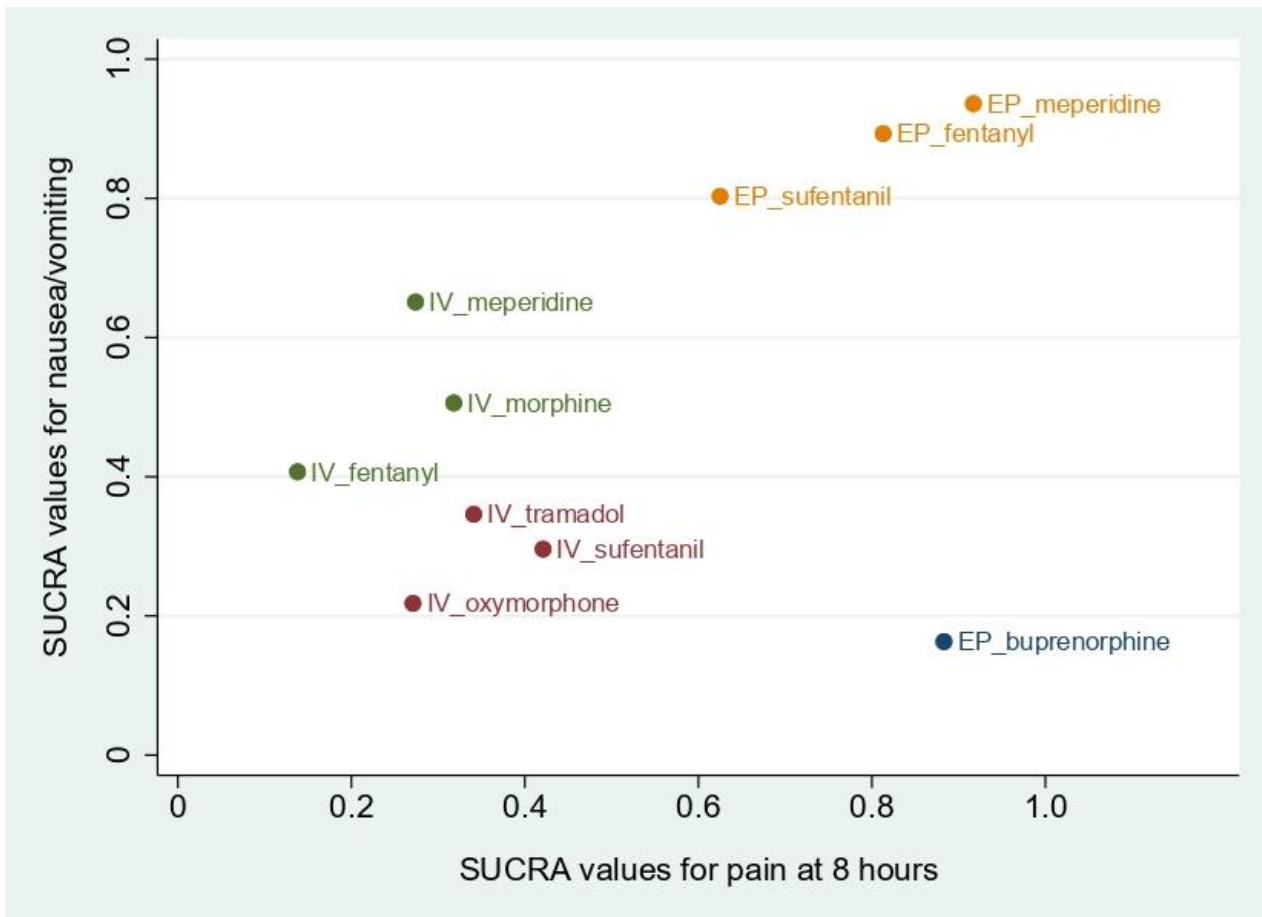

E.

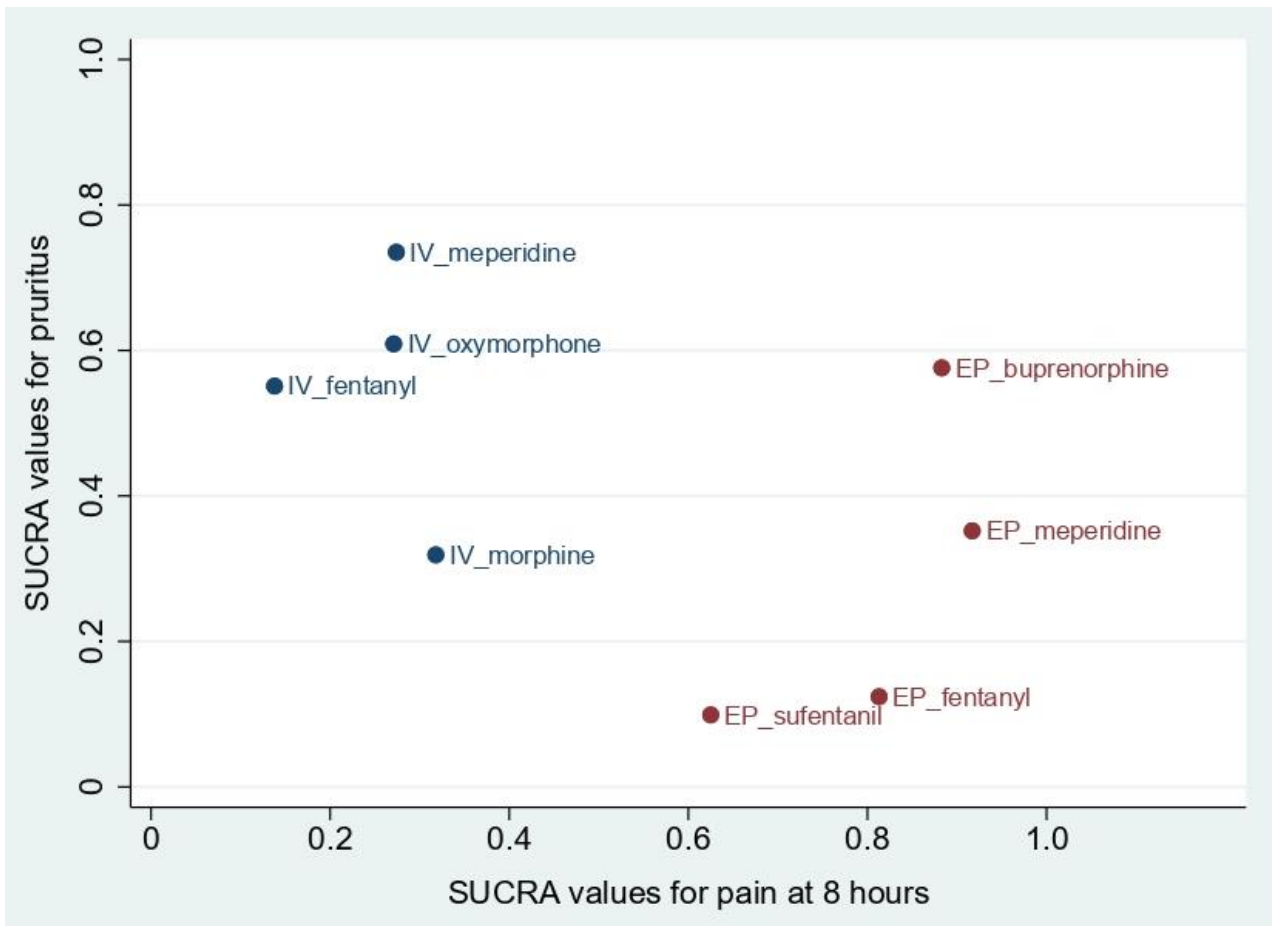

F.

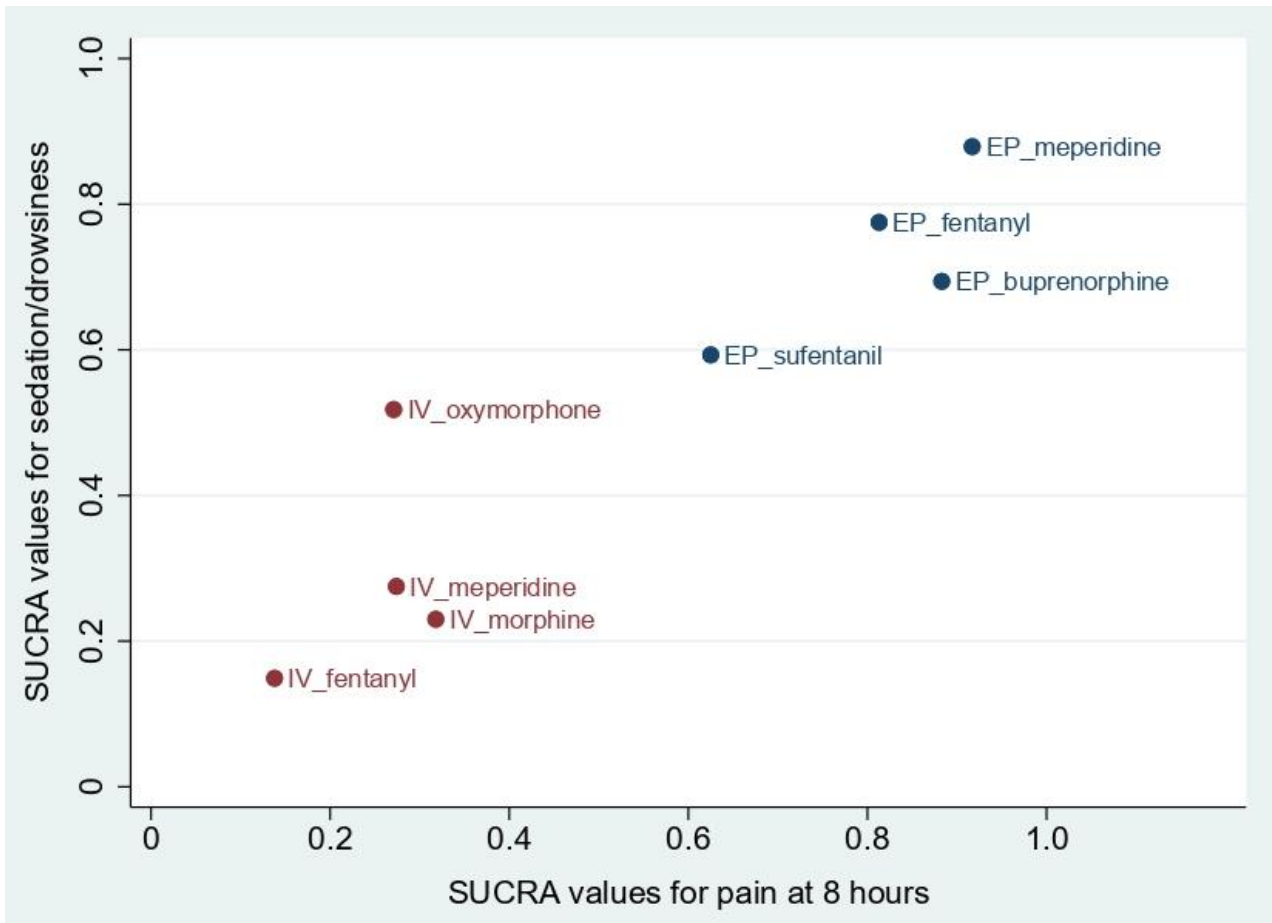

G.

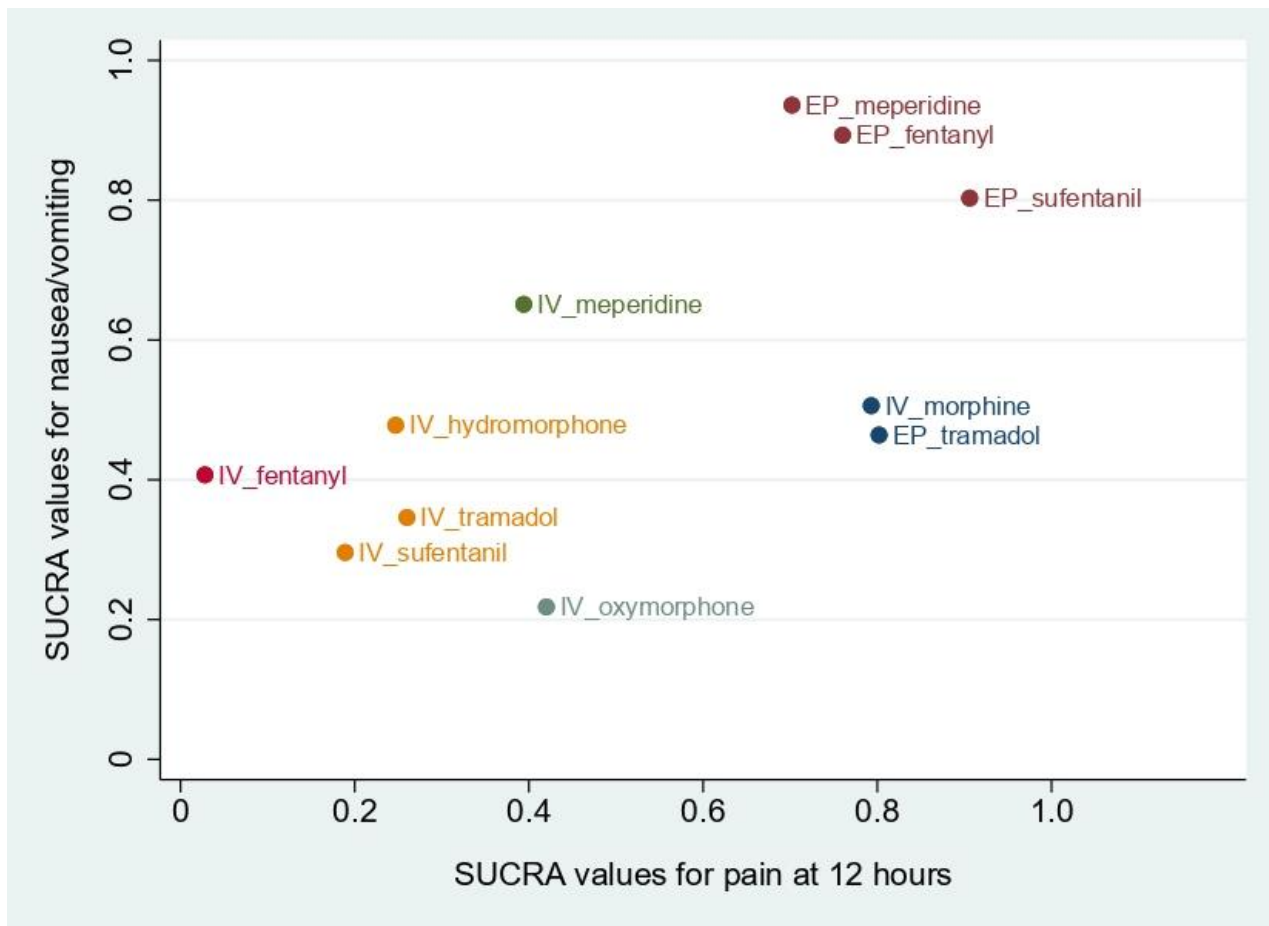

H.

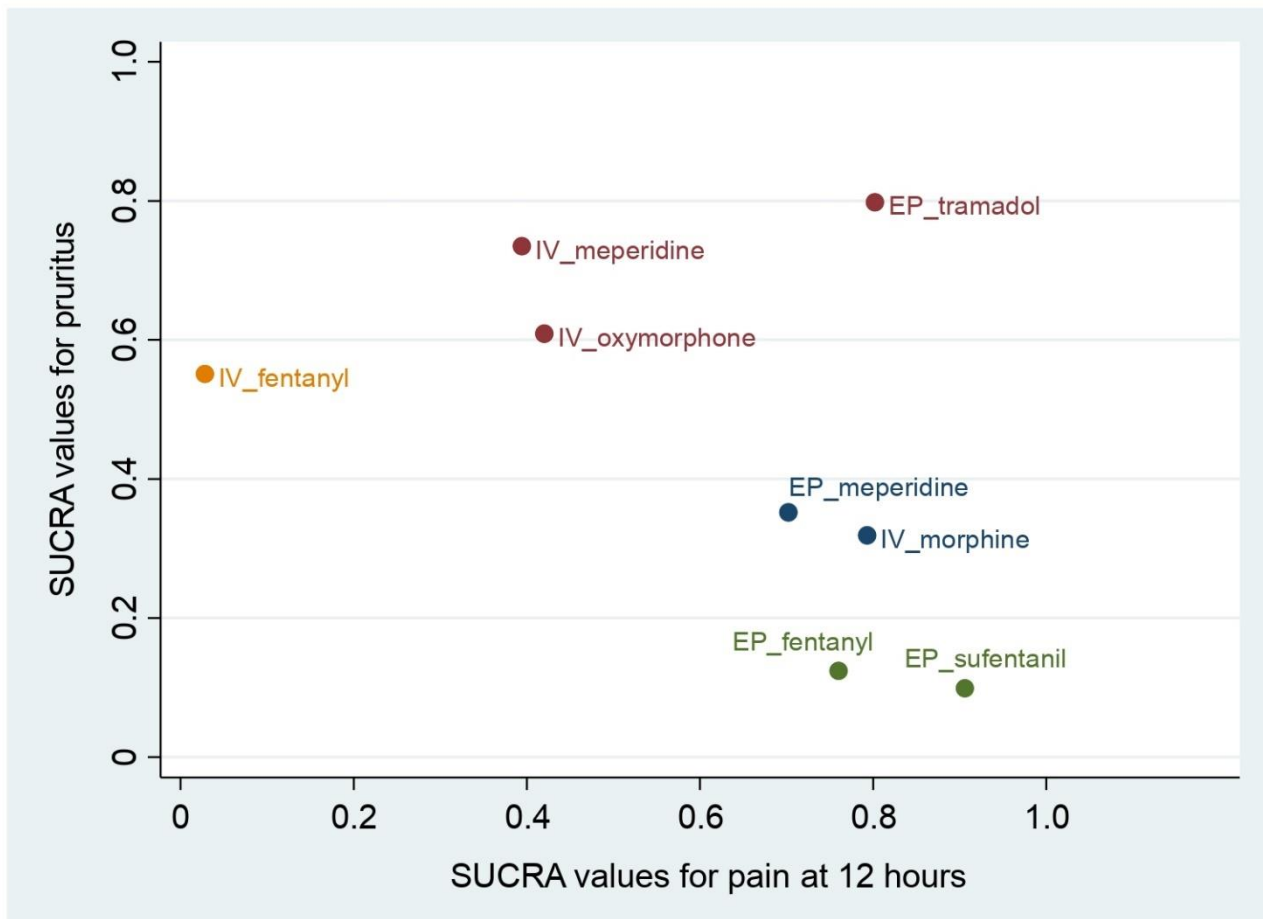

I.

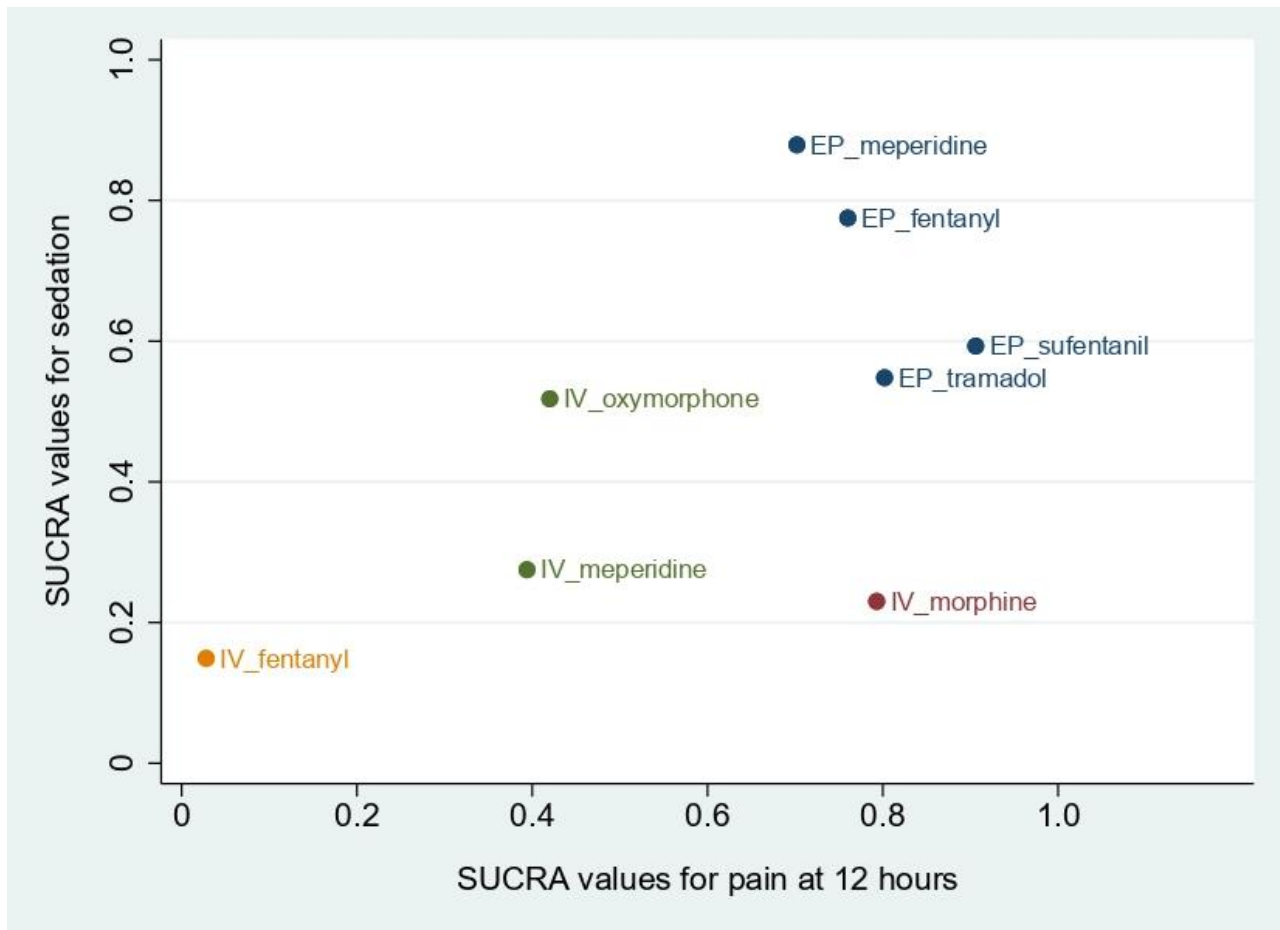

J.

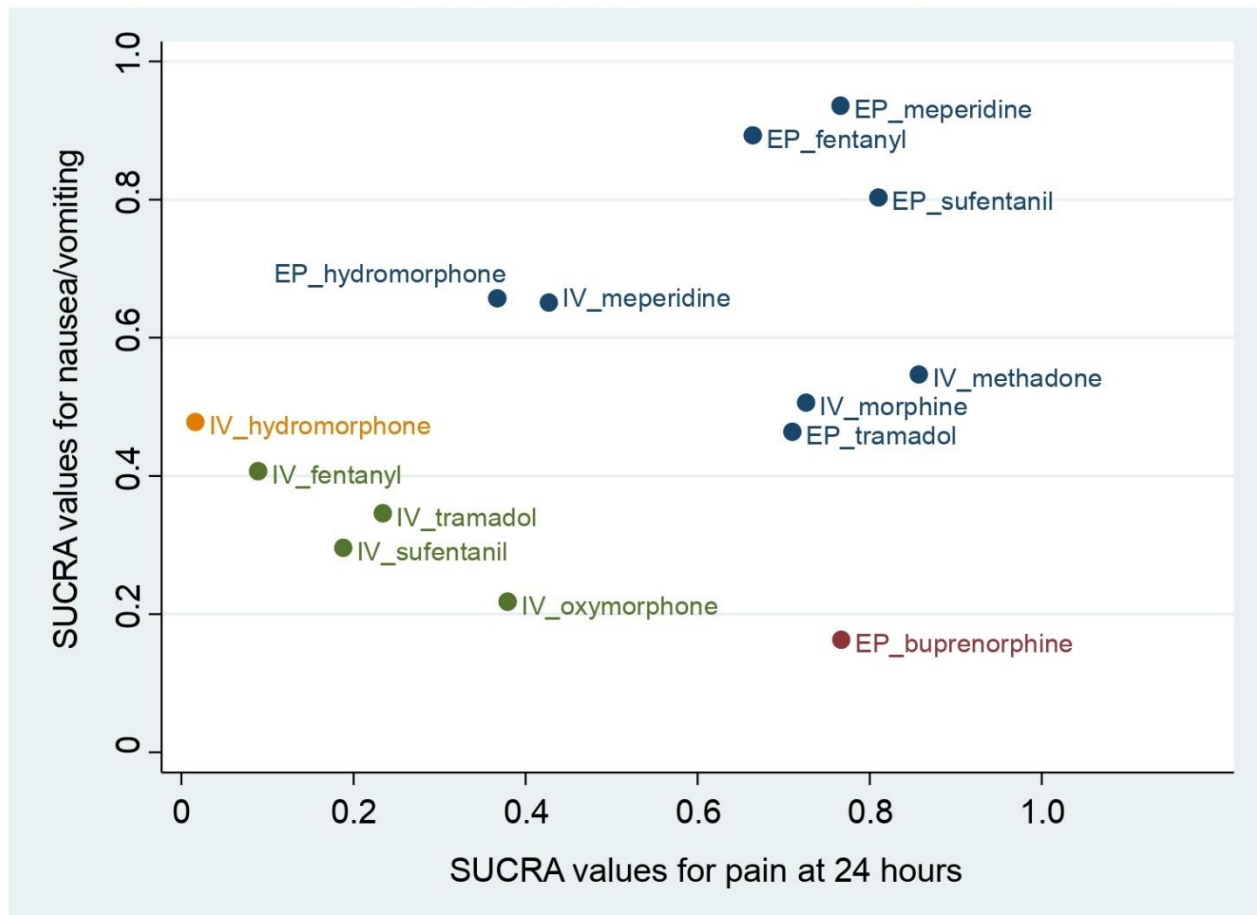

K.

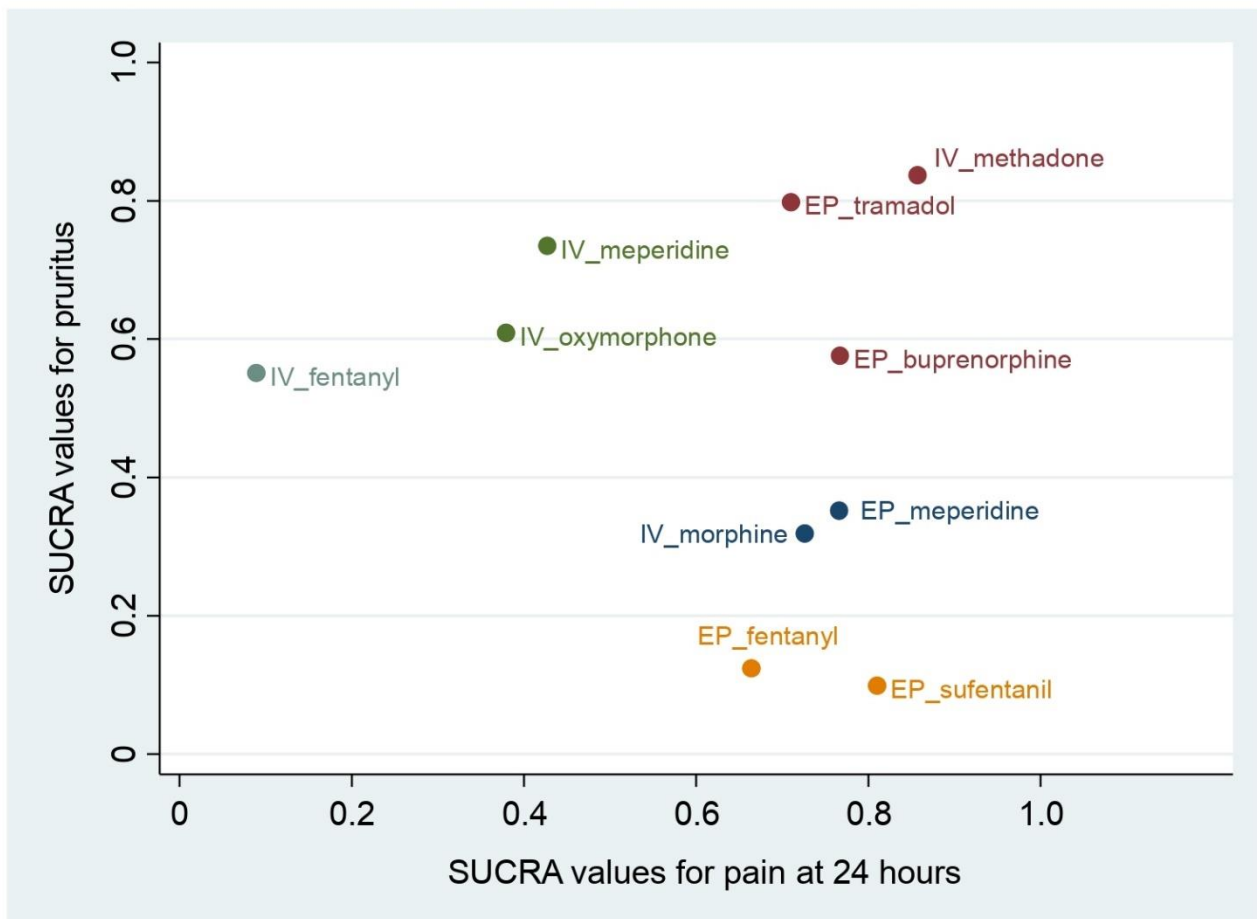

L.

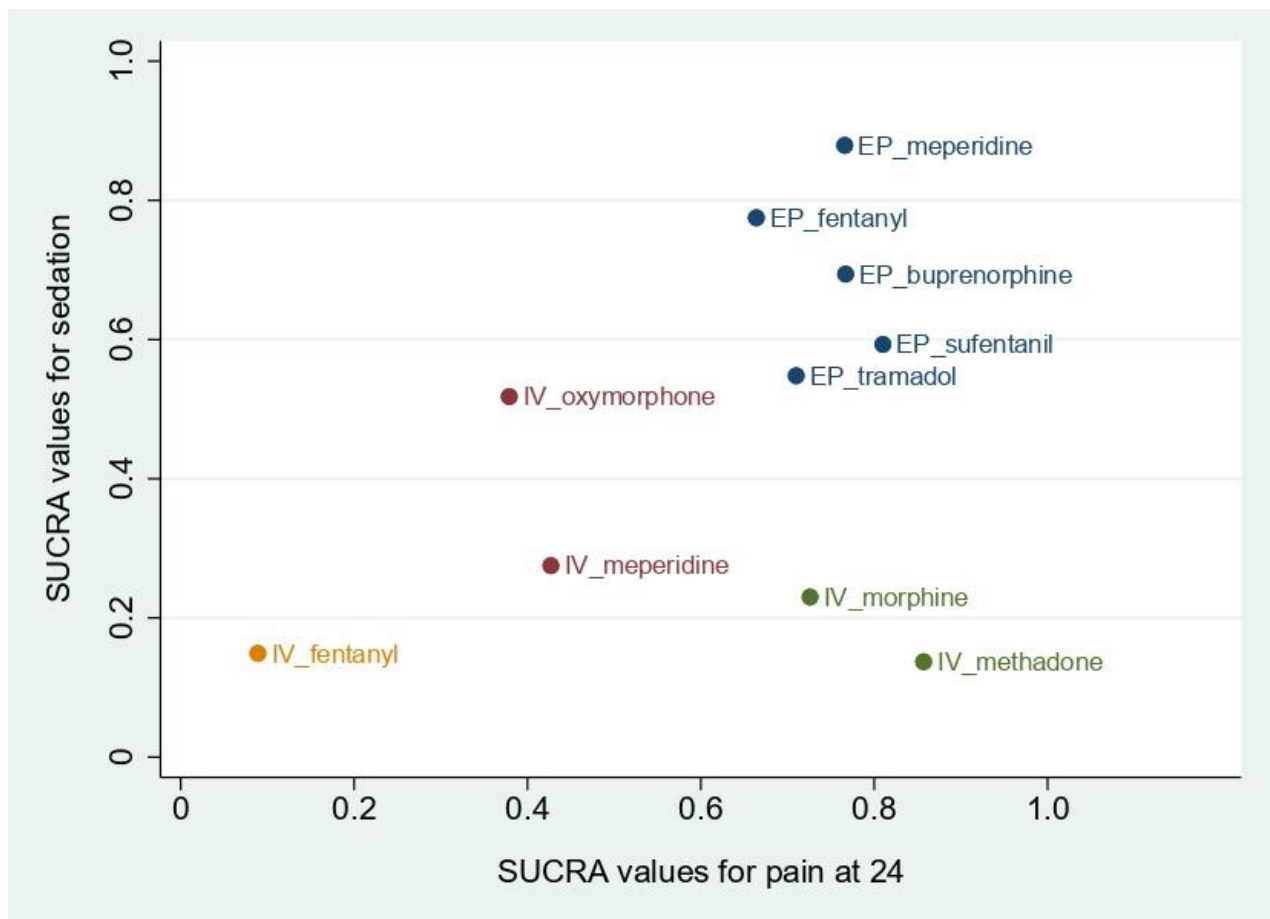



**Supplementary Figure S16.** Clustered ranking plots

Clustered ranking plots are based on cluster analysis of SUCRA values for two different outcomes: analgesic efficacy and adverse effects. Each colour represents a group of treatments that belong to the same cluster. Treatments lying at the upper right corner are more effective and safer (i.e., with lower odds of adverse effects) than the other treatments. (A) Pain intensity at 4 hours after surgery and nausea/vomiting; (B) Pain intensity at 4 hours after surgery and pruritus; (C) Pain intensity at 4 hours after surgery and sedation/drowsiness; (D) Pain intensity at 8 hours after surgery and nausea/vomiting; (E) Pain intensity at 8 hours after surgery and pruritus; (F) Pain intensity at 8 hours after surgery and sedation/drowsiness; (G) Pain intensity at 12 hours after surgery and nausea/vomiting; (H) Pain intensity at 12 hours after surgery and pruritus; (I) Pain intensity at 12 hours after surgery and sedation/drowsiness; (J) Pain intensity at 24 hours after surgery and nausea/vomiting; (K) Pain intensity at 24 hours after surgery and pruritus; (L) Pain intensity at 24 hours after surgery and sedation/drowsiness. The prefix “IV\_” denotes IVPCA, and the prefix “EP\_” denotes PCEA. SUCRA, the surface under the cumulative ranking curve.

**Supplementary Table S10.** Assessment of network inconsistency**A.** Design-by-treatment interaction model

| Outcomes            | Chi-square | <i>p</i> -value for test of global inconsistency |
|---------------------|------------|--------------------------------------------------|
| Pain at 4 hours     | 1.37       | 0.8492                                           |
| Pain at 8 hours     | 2.13       | 0.7120                                           |
| Pain at 12 hours    | 3.74       | 0.7117                                           |
| Pain at 24 hours    | 0.36       | 0.8351                                           |
| Nausea/vomiting     | 1.17       | 0.8826                                           |
| Pruritus            | 6.01       | 0.3050                                           |
| Sedation/drowsiness | 4.22       | 0.3771                                           |

A *p*-value < 0.05 indicates that the inconsistency is statistically significant.

**B.** Loop inconsistency model

| Outcomes            | Chi-square | <i>p</i> -value for test of global inconsistency |
|---------------------|------------|--------------------------------------------------|
| Pain at 4 hours     | 0.31       | 0.8564                                           |
| Pain at 8 hours     | 1.34       | 0.5121                                           |
| Pain at 12 hours    | 1.60       | 0.8096                                           |
| Pain at 24 hours    | 0.15       | 0.9269                                           |
| Nausea/vomiting     | 0.73       | 0.6954                                           |
| Pruritus            | 5.90       | 0.1164                                           |
| Sedation/drowsiness | 0.76       | 0.6844                                           |

A *p*-value < 0.05 indicates that the inconsistency is statistically significant.

**C.** Side-splitting model on pain at 4 hours

| Side | Direct      |       | Indirect    |       | Difference  |       | <i>p</i> -value |
|------|-------------|-------|-------------|-------|-------------|-------|-----------------|
|      | Coefficient | SE    | Coefficient | SE    | Coefficient | SE    |                 |
| A C  | 0.762       | 0.849 | 0.279       | 0.594 | 0.483       | 1.070 | 0.652           |
| A D  | 0.401       | 0.325 | -0.648      | 1.848 | 1.049       | 1.885 | 0.578           |
| A H  | -0.780      | 0.215 | -0.256      | 0.918 | -0.524      | 0.943 | 0.578           |
| B C  | 0.511       | 0.799 | 0.187       | 0.731 | 0.324       | 1.068 | 0.761           |
| B H  | -0.822      | 0.412 | -1.871      | 1.859 | 1.049       | 1.885 | 0.578           |
| B I  | -1.346      | 0.743 | -1.883      | 0.921 | 0.537       | 1.200 | 0.654           |
| C D  | -0.361      | 0.773 | 0.159       | 0.707 | -0.520      | 1.060 | 0.624           |
| C H  | -0.704      | 0.715 | -1.547      | 0.605 | 0.842       | 0.935 | 0.368           |
| C I  | -1.827      | 0.436 | -2.876      | 1.816 | 1.049       | 1.885 | 0.578           |
| H I  | -1.093      | 0.660 | -0.090      | 0.823 | -1.003      | 1.071 | 0.349           |

A *p*-value < 0.05 indicates that the difference coefficient is statistically significant; Side A C means C vs. A; A: IVPCA morphine; B: IVPCA fentanyl; C: IVPCA meperidine; D: IVPCA oxymorphone; E: IVPCA sufentanil; F: IVPCA tramadol; G: PCEA buprenorphine; H: PCEA fentanyl; I: PCEA meperidine; SE: standard error

## D. Side-splitting model on pain at 8 hours

| Side | Direct      |       | Indirect    |       | Difference  |       | <i>p</i> -value |
|------|-------------|-------|-------------|-------|-------------|-------|-----------------|
|      | Coefficient | SE    | Coefficient | SE    | Coefficient | SE    |                 |
| A C  | 0.731       | 0.897 | -0.177      | 0.532 | 0.908       | 1.060 | 0.392           |
| A D  | 0.188       | 0.359 | -1.708      | 1.807 | 1.896       | 1.865 | 0.309           |
| A H  | -1.065      | 0.358 | -0.117      | 0.861 | -0.948      | 0.933 | 0.309           |
| B C  | -0.385      | 0.641 | -0.127      | 0.683 | -0.259      | 0.888 | 0.771           |
| B H  | -1.210      | 0.400 | -3.106      | 1.862 | 1.895       | 1.865 | 0.309           |
| B I  | -1.262      | 0.694 | -2.109      | 0.732 | 0.847       | 0.976 | 0.385           |
| C D  | -0.443      | 0.759 | 0.412       | 0.684 | -0.855      | 1.017 | 0.401           |
| C H  | -0.547      | 0.486 | -1.701      | 0.608 | 1.155       | 0.764 | 0.131           |
| C I  | -1.359      | 0.297 | -3.254      | 1.852 | 1.896       | 1.865 | 0.309           |
| H I  | -0.625      | 0.564 | 0.012       | 0.804 | -0.637      | 0.989 | 0.520           |

A *p*-value < 0.05 indicates that the difference coefficient is statistically significant; Side A C means C vs. A; A: IVPCA morphine; B: IVPCA fentanyl; C: IVPCA meperidine; D: IVPCA oxymorphone; E: IVPCA sufentanil; F: IVPCA tramadol; G: PCEA buprenorphine; H: PCEA fentanyl; I: PCEA meperidine; SE: standard error

## E. Side-splitting model on pain at 12 hours

| Side | Direct      |       | Indirect    |       | Difference  |       | <i>p</i> -value |
|------|-------------|-------|-------------|-------|-------------|-------|-----------------|
|      | Coefficient | SE    | Coefficient | SE    | Coefficient | SE    |                 |
| A C  | 0.928       | 0.529 | 1.373       | 0.542 | -0.446      | 0.788 | 0.572           |
| A D  | 1.028       | 0.247 | 1.493       | 1.510 | -0.465      | 1.535 | 0.762           |
| A G  | 0.061       | 0.494 | 0.101       | 0.497 | -0.040      | 0.701 | 0.954           |
| A I  | 0.040       | 0.744 | -0.326      | 0.461 | 0.366       | 0.875 | 0.676           |
| B C  | -0.205      | 0.904 | -1.499      | 0.651 | 1.294       | 1.107 | 0.243           |
| B G  | -2.085      | 0.432 | -2.844      | 1.276 | 0.759       | 1.268 | 0.550           |
| B H  | -2.057      | 0.700 | -1.896      | 0.677 | -0.160      | 0.940 | 0.865           |
| C D  | -0.135      | 0.488 | -0.053      | 0.631 | -0.082      | 0.811 | 0.920           |
| C G  | -0.716      | 0.674 | -1.219      | 0.447 | 0.503       | 0.812 | 0.536           |
| C H  | -1.018      | 0.345 | -0.244      | 0.879 | -0.774      | 0.945 | 0.413           |
| G H  | 0.049       | 0.393 | 0.437       | 0.658 | -0.388      | 0.767 | 0.613           |
| G I  | -0.333      | 0.243 | 0.032       | 0.841 | -0.366      | 0.875 | 0.676           |

A *p*-value < 0.05 indicates that the difference coefficient is statistically significant; Side A C means C vs. A; A: IVPCA morphine; B: IVPCA fentanyl; C: IVPCA meperidine; D: IVPCA oxymorphone; E: IVPCA sufentanil; F: IVPCA tramadol; G: PCEA fentanyl; H: PCEA meperidine; I: PCEA sufentanil; J: PCEA tramadol; K: IVPCA hydromorphone; SE: standard error

## F. Side-splitting model on pain at 24 hours

| Side | Direct      |    | Indirect    |    | Difference  |    | <i>p</i> -value |
|------|-------------|----|-------------|----|-------------|----|-----------------|
|      | Coefficient | SE | Coefficient | SE | Coefficient | SE |                 |

|     |        |       |        |       |        |       |       |
|-----|--------|-------|--------|-------|--------|-------|-------|
| A C | 0.859  | 0.479 | 1.522  | 1.012 | -0.663 | 1.107 | 0.549 |
| A E | 1.186  | 0.210 | 2.315  | 2.902 | -1.129 | 2.900 | 0.697 |
| A K | -0.007 | 0.660 | -0.572 | 1.291 | 0.565  | 1.450 | 0.697 |
| C E | 0.108  | 0.739 | 0.347  | 0.881 | -0.239 | 1.315 | 0.856 |
| C J | -1.100 | 0.539 | -0.535 | 1.346 | -0.565 | 1.450 | 0.697 |
| I J | 0.057  | 1.050 | -0.507 | 1.000 | 0.565  | 1.450 | 0.697 |
| I K | -0.333 | 0.249 | 0.231  | 1.428 | -0.565 | 1.450 | 0.697 |

A  $p$ -value < 0.05 indicates that the difference coefficient is statistically significant; Comparison A C means C vs. A; A: IVPCA morphine; B: IVPCA fentanyl; C: IVPCA meperidine; D: IVPCA methadone; E: IVPCA oxymorphone; F: IVPCA sufentanil; G: IVPCA tramadol; H: PCEA buprenorphine; I: PCEA fentanyl; J: PCEA meperidine; K: PCEA sufentanil; L: PCEA tramadol; M: PCEA hydromorphone; N: IVPCA hydromorphone; SE: standard error

#### G. Side-splitting model on nausea/vomiting

| Side | Direct      |       | Indirect    |       | Difference  |       | $p$ -value |
|------|-------------|-------|-------------|-------|-------------|-------|------------|
|      | Coefficient | SE    | Coefficient | SE    | Coefficient | SE    |            |
| A B  | 0.887       | 0.938 | -0.195      | 0.864 | 1.082       | 1.276 | 0.396      |
| A C  | -0.407      | 0.521 | -0.627      | 1.449 | 0.221       | 1.540 | 0.886      |
| A F  | 0.955       | 0.661 | 0.649       | 2.056 | 0.305       | 2.240 | 0.892      |
| A J  | -1.565      | 0.690 | -0.841      | 0.936 | -0.724      | 1.163 | 0.534      |
| B J  | -1.390      | 0.577 | -2.472      | 1.138 | 1.082       | 1.276 | 0.396      |
| C F  | 1.480       | 0.872 | 1.146       | 1.098 | 0.334       | 1.436 | 0.816      |
| C K  | -1.543      | 1.592 | -1.088      | 0.985 | -0.455      | 1.872 | 0.808      |
| J K  | -0.288      | 0.607 | -0.743      | 1.771 | 0.455       | 1.872 | 0.808      |

A  $p$ -value < 0.05 indicates that the difference coefficient is statistically significant; Side A B means B vs. A; A: IVPCA morphine; B: IVPCA fentanyl; C: IVPCA meperidine; D: IVPCA meptazinol; E: IVPCA methadone; F: IVPCA oxymorphone; G: IVPCA sufentanil; H: IVPCA tramadol; I: PCEA buprenorphine; J: PCEA fentanyl; K: PCEA meperidine; L: PCEA sufentanil; M: PCEA tramadol; N: PCEA hydromorphone; O: IVPCA hydromorphone; SE: standard error

#### H. Side-splitting model on pruritus

| Side | Direct      |       | Indirect    |       | Difference  |       | $p$ -value |
|------|-------------|-------|-------------|-------|-------------|-------|------------|
|      | Coefficient | SE    | Coefficient | SE    | Coefficient | SE    |            |
| A B  | -1.099      | 1.737 | -0.484      | 0.804 | -0.615      | 1.914 | 0.748      |
| A C  | -1.295      | 0.717 | -1.212      | 1.243 | -0.083      | 1.420 | 0.953      |
| A E  | -0.951      | 0.897 | -0.093      | 2.788 | -0.858      | 2.868 | 0.765      |
| A G  | 0.041       | 0.516 | 1.417       | 0.709 | -1.377      | 0.877 | 0.116      |
| A I  | 2.208       | 0.865 | -0.301      | 0.582 | 2.509       | 1.043 | 0.016      |
| B G  | 1.127       | 0.596 | 1.741       | 1.822 | -0.615      | 1.914 | 0.748      |
| C E  | 0.685       | 1.338 | -0.032      | 1.619 | 0.717       | 2.184 | 0.743      |
| C H  | 1.172       | 0.797 | 1.363       | 1.267 | -0.191      | 1.496 | 0.898      |
| G H  | -0.588      | 0.857 | -0.779      | 1.226 | 0.191       | 1.496 | 0.898      |

|     |        |       |       |       |        |       |       |
|-----|--------|-------|-------|-------|--------|-------|-------|
| G I | -0.394 | 0.400 | 2.115 | 0.963 | -2.509 | 1.043 | 0.016 |
|-----|--------|-------|-------|-------|--------|-------|-------|

A  $p$ -value < 0.05 indicates that the difference coefficient is statistically significant; Side A B means B vs. A; A: IVPCA morphine; B: IVPCA fentanyl; C: IVPCA meperidine; D: IVPCA methadone; E: IVPCA oxymorphone; F: PCEA buprenorphine; G: PCEA fentanyl; H: PCEA meperidine; I: PCEA sufentanil; J: PCEA tramadol; SE: standard error

#### I. Side-splitting model on sedation/drowsiness

| Side | Direct      |       | Indirect    |       | Difference  |       | $p$ -value |
|------|-------------|-------|-------------|-------|-------------|-------|------------|
|      | Coefficient | SE    | Coefficient | SE    | Coefficient | SE    |            |
| A C  | -0.096      | 0.382 | -0.166      | 0.771 | 0.070       | 0.824 | 0.932      |
| A F  | -0.816      | 0.408 | 1.221       | 1.483 | -2.037      | 1.426 | 0.153      |
| A H  | -1.569      | 0.500 | -1.441      | 0.518 | -0.127      | 0.720 | 0.860      |
| A J  | -0.748      | 0.597 | -1.326      | 0.502 | 0.577       | 0.780 | 0.459      |
| C F  | 0.268       | 0.734 | -1.879      | 0.804 | 2.147       | 1.089 | 0.049      |
| C I  | -1.996      | 0.543 | -1.368      | 0.773 | -0.628      | 0.945 | 0.506      |
| H I  | -0.187      | 0.537 | -0.814      | 0.777 | 0.628       | 0.945 | 0.506      |
| H J  | 0.359       | 0.256 | 0.936       | 0.737 | -0.577      | 0.780 | 0.459      |

A  $p$ -value < 0.05 indicates that the difference coefficient is statistically significant; Side A C means C vs. A; A: IVPCA morphine; B: IVPCA fentanyl; C: IVPCA meperidine; D: IVPCA meptazinol; E: IVPCA methadone; F: IVPCA oxymorphone; G: PCEA buprenorphine; H: PCEA fentanyl; I: PCEA meperidine; J: PCEA sufentanil; K: PCEA tramadol; SE: standard error

A.

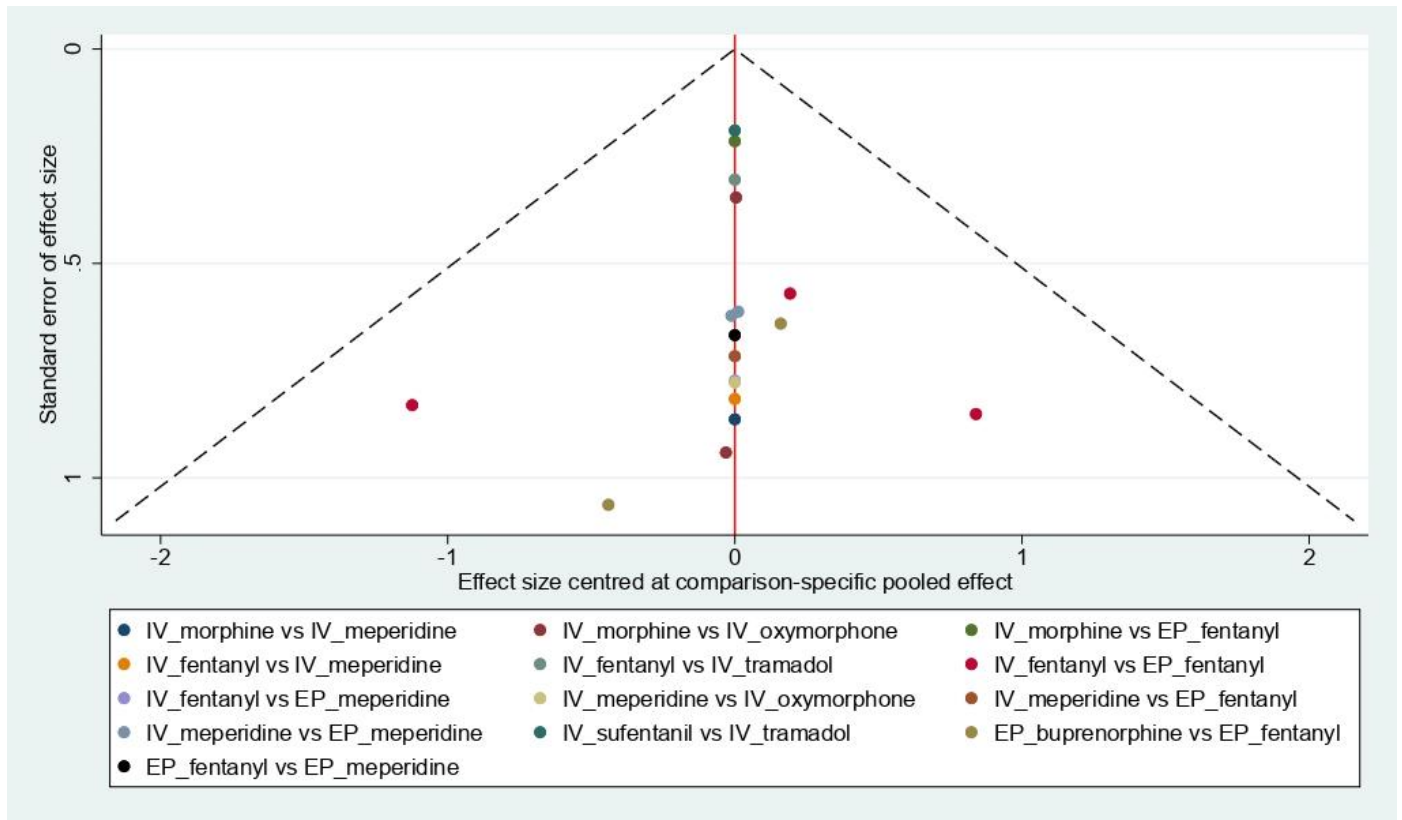

B.

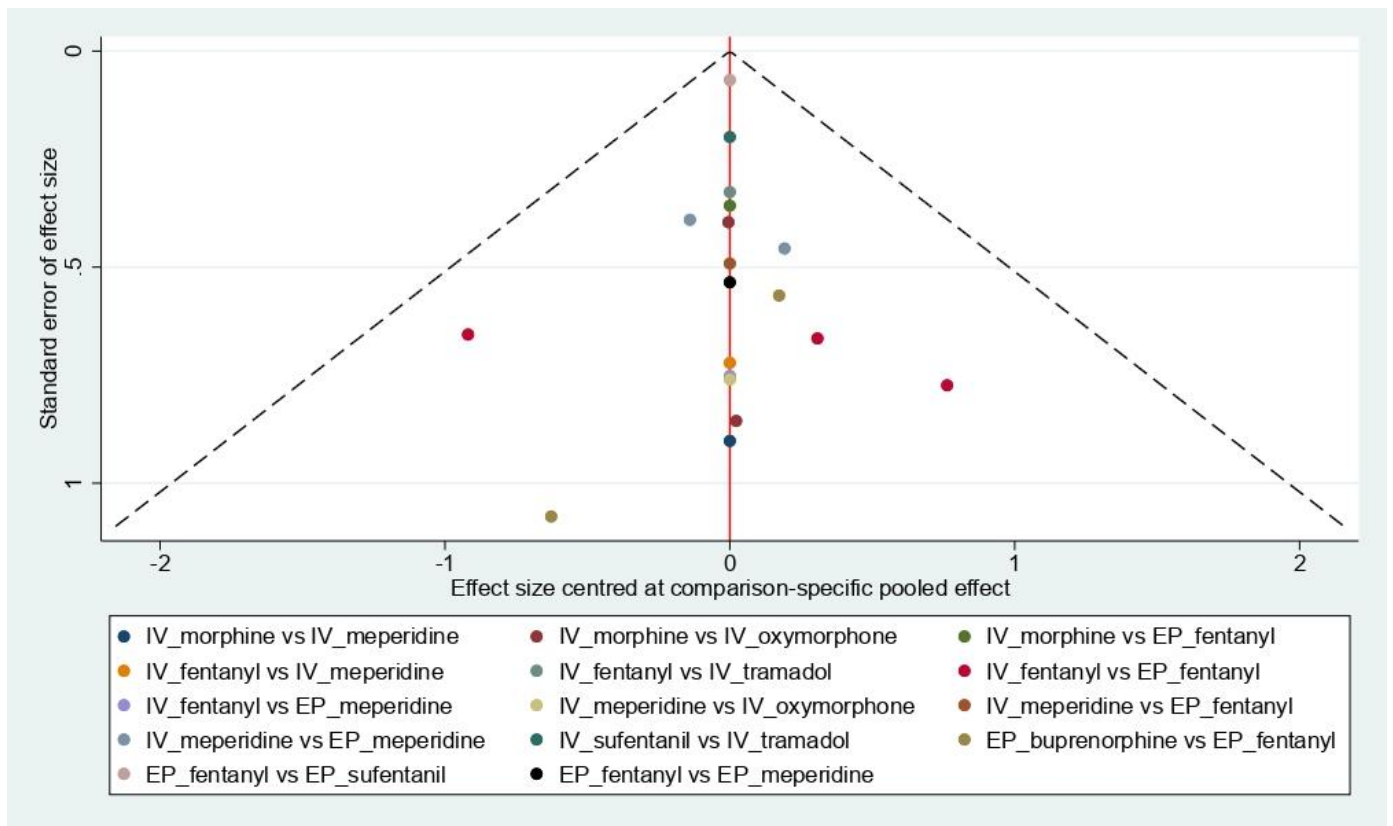

C.

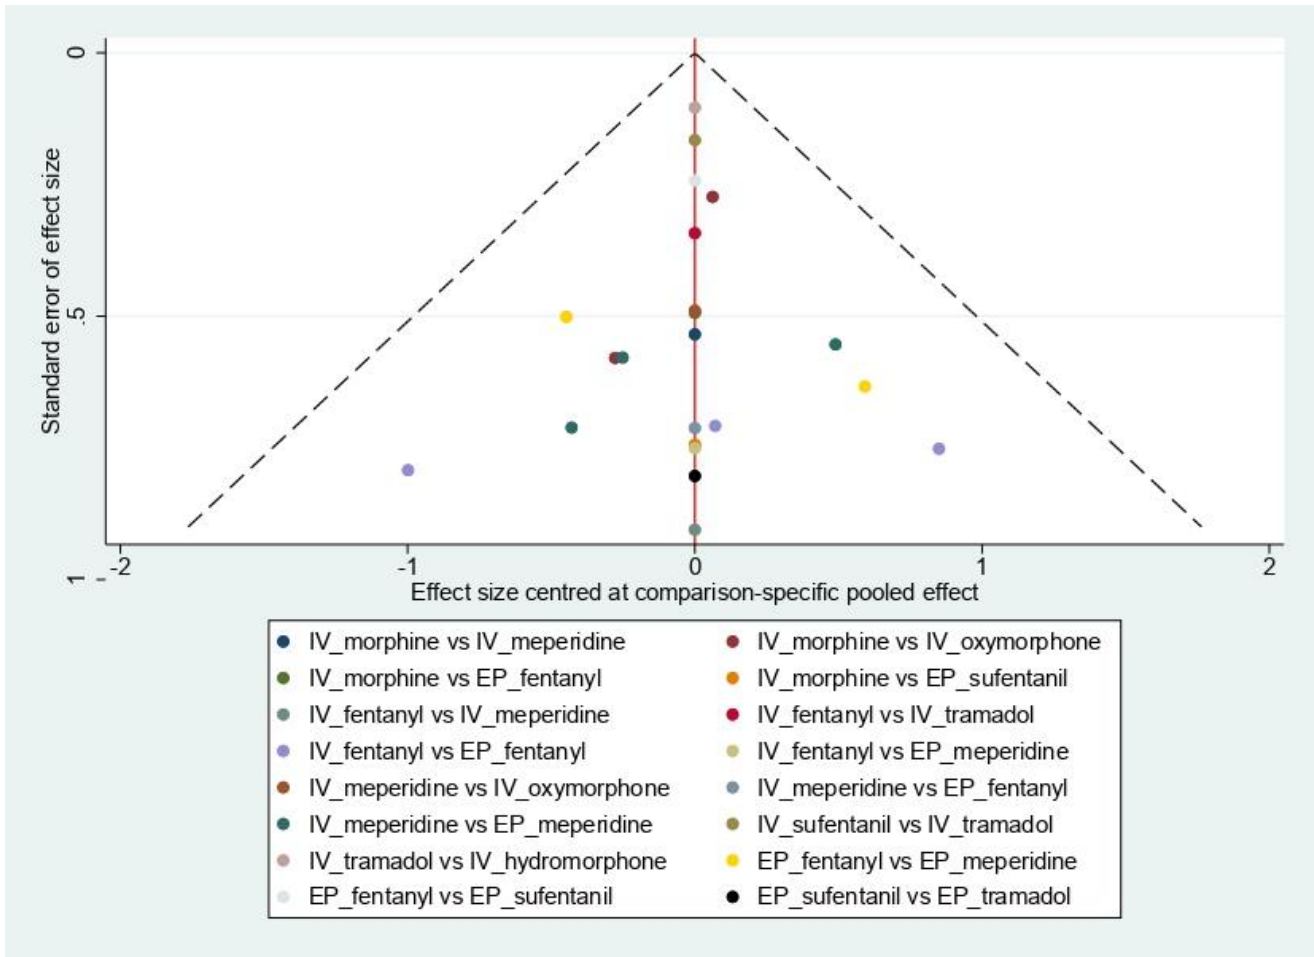

D.

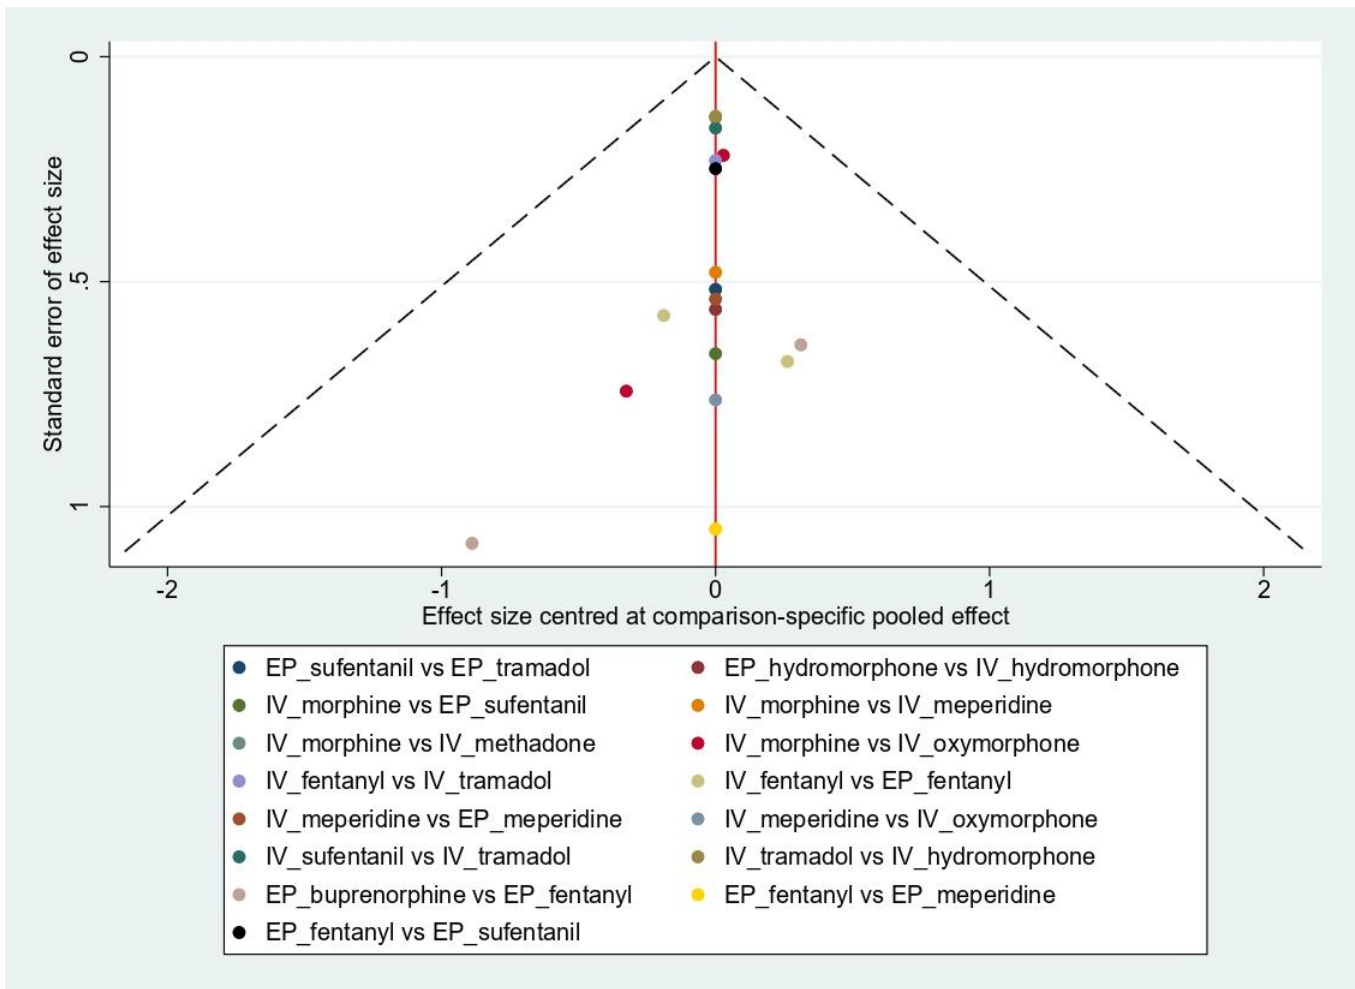

E.

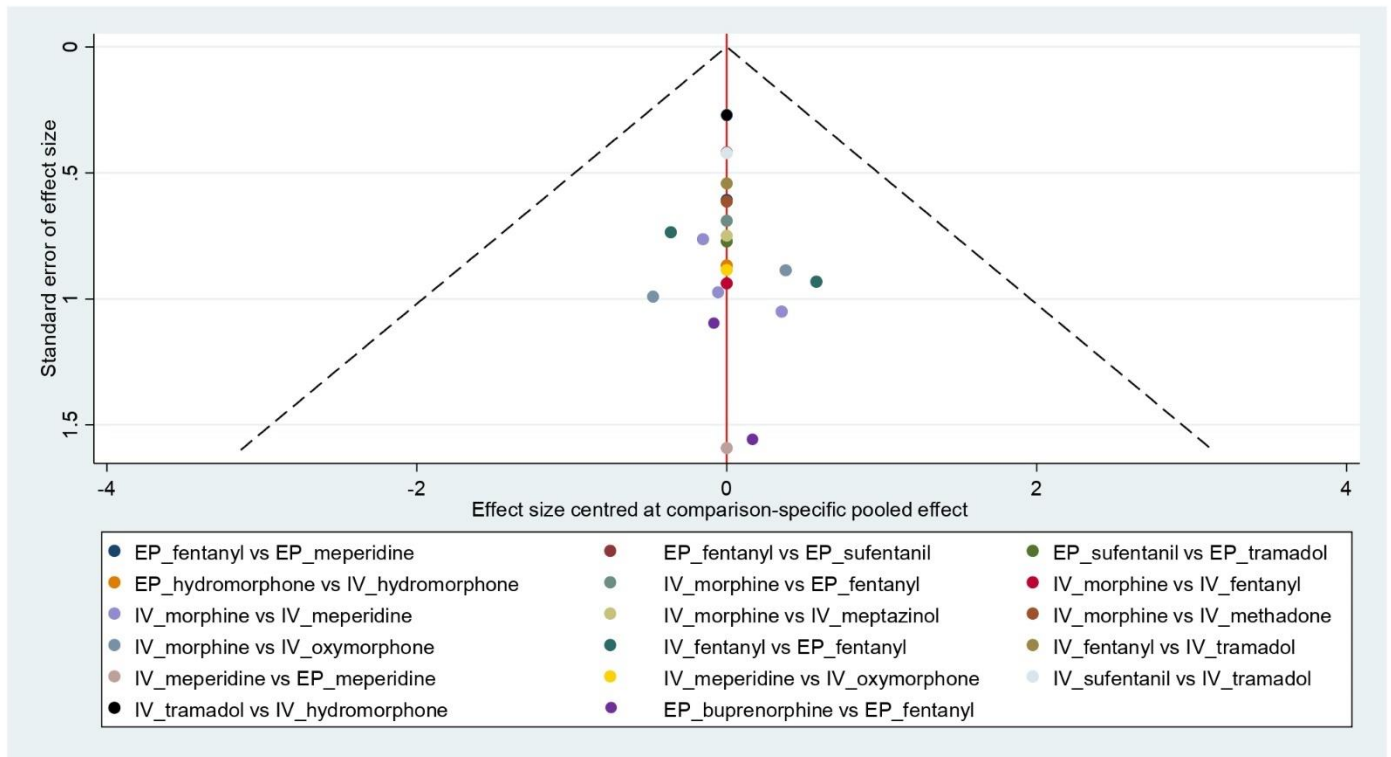

F.

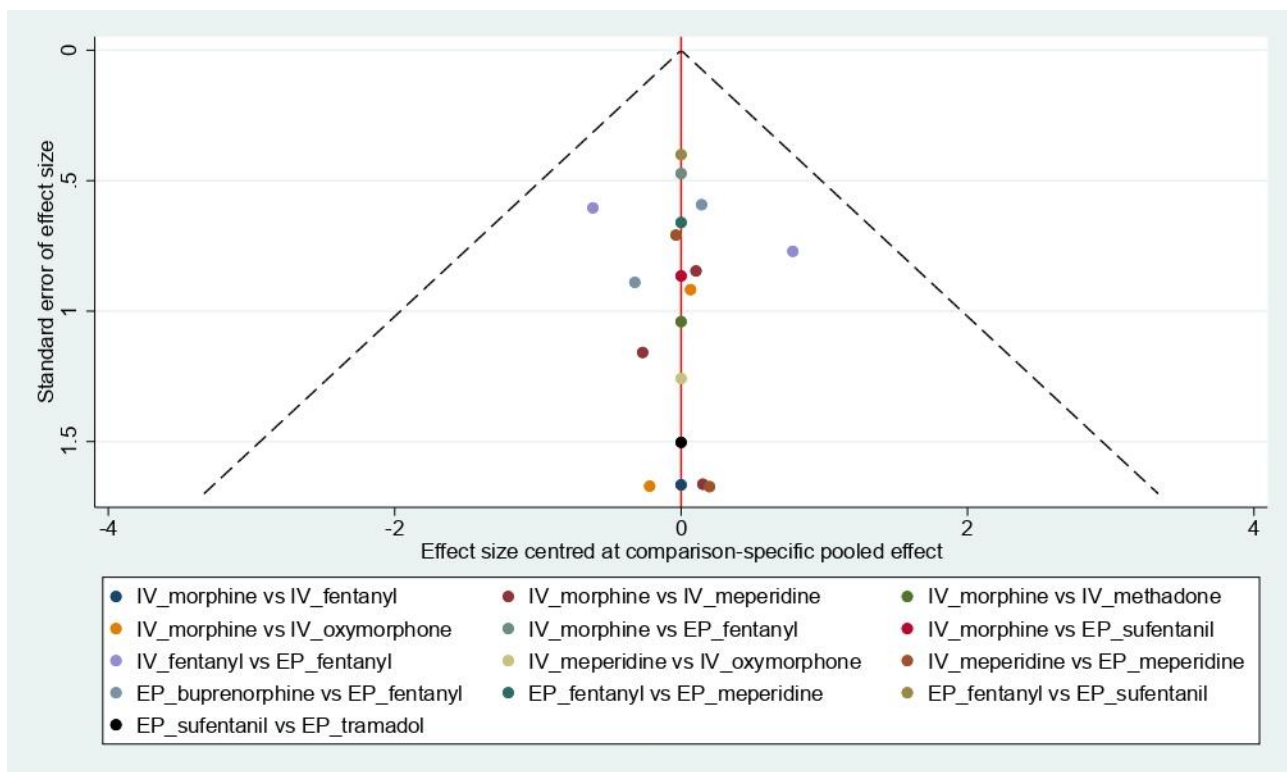

G.



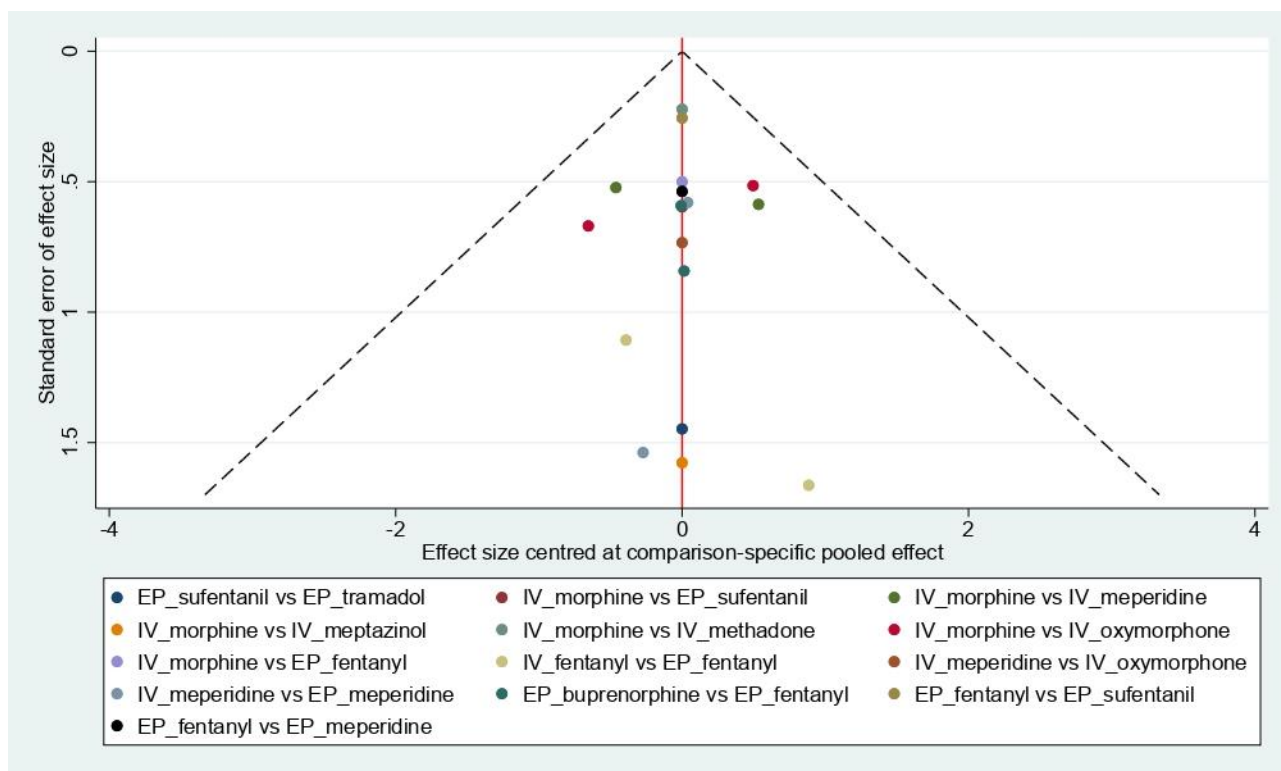

**Supplementary Figure S17.** Comparison-adjusted funnel plots

(A) pain intensity at 4 hours after surgery, (B) pain intensity at 8 hours after surgery, (C) pain intensity at 12 hours after surgery, (D) pain intensity at 24 hours after surgery, (E) nausea/vomiting, (F) pruritus, and (G) sedation/drowsiness.

A.

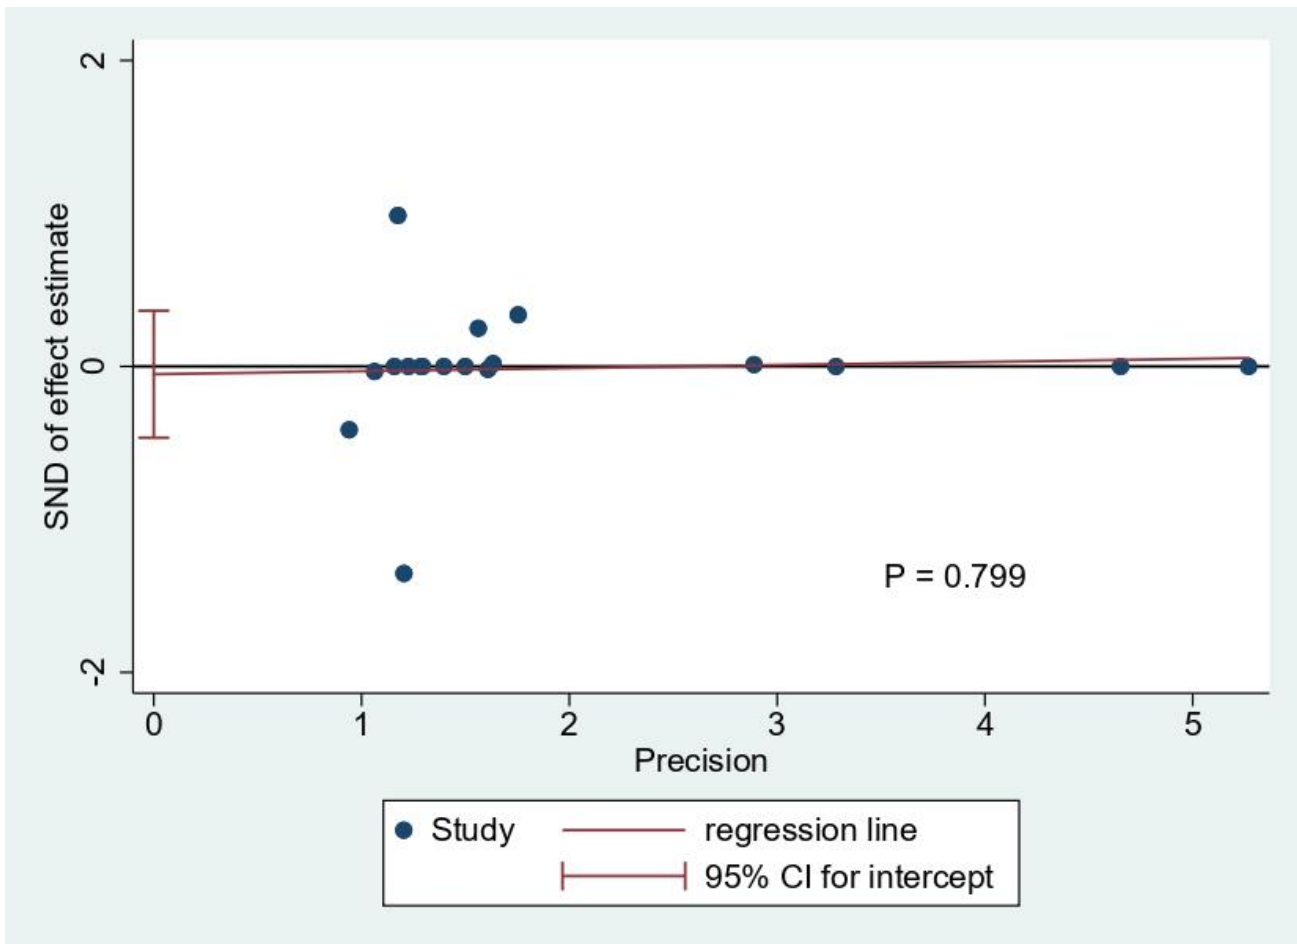

B.

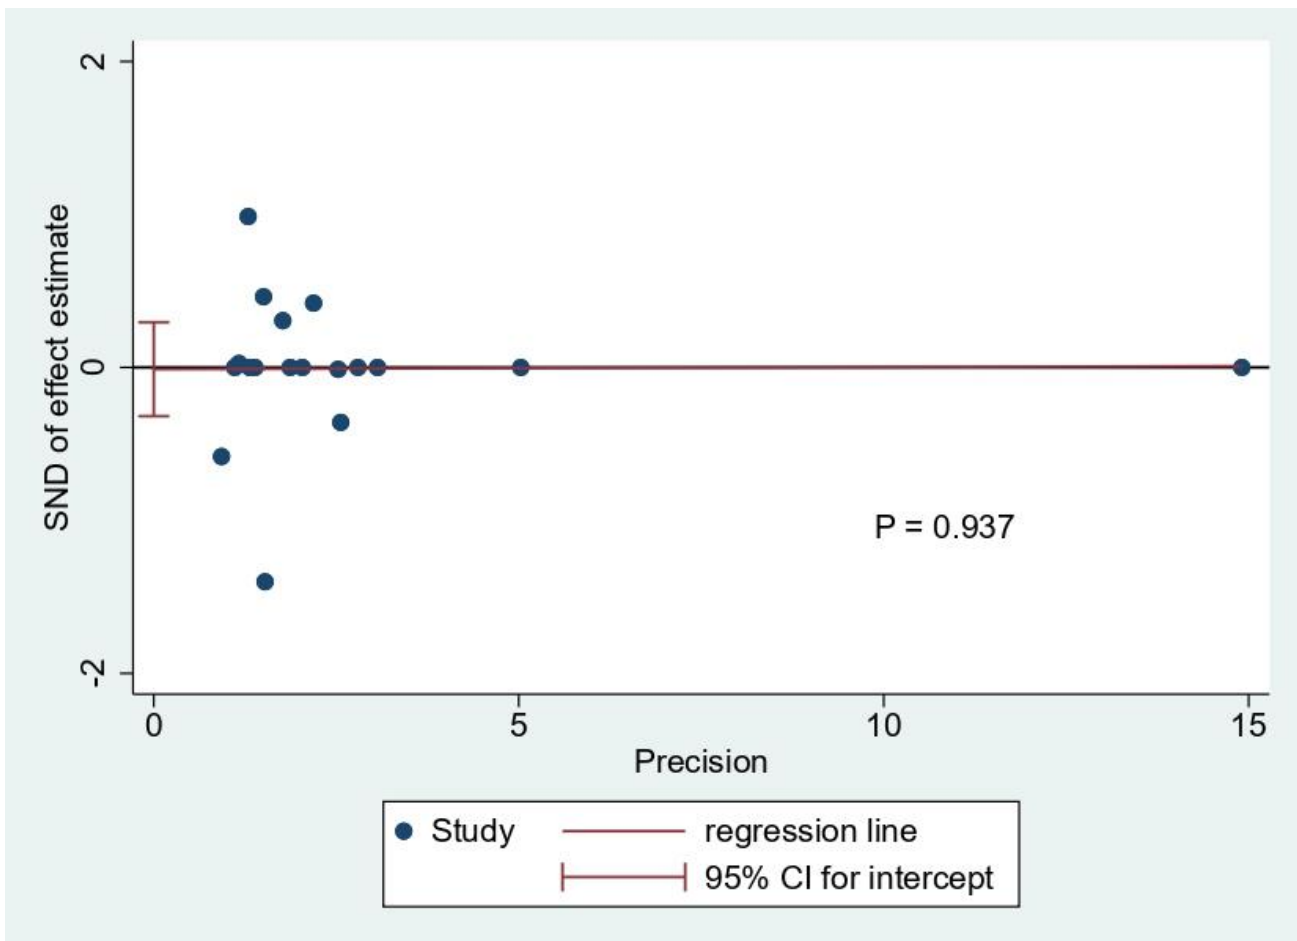

C.

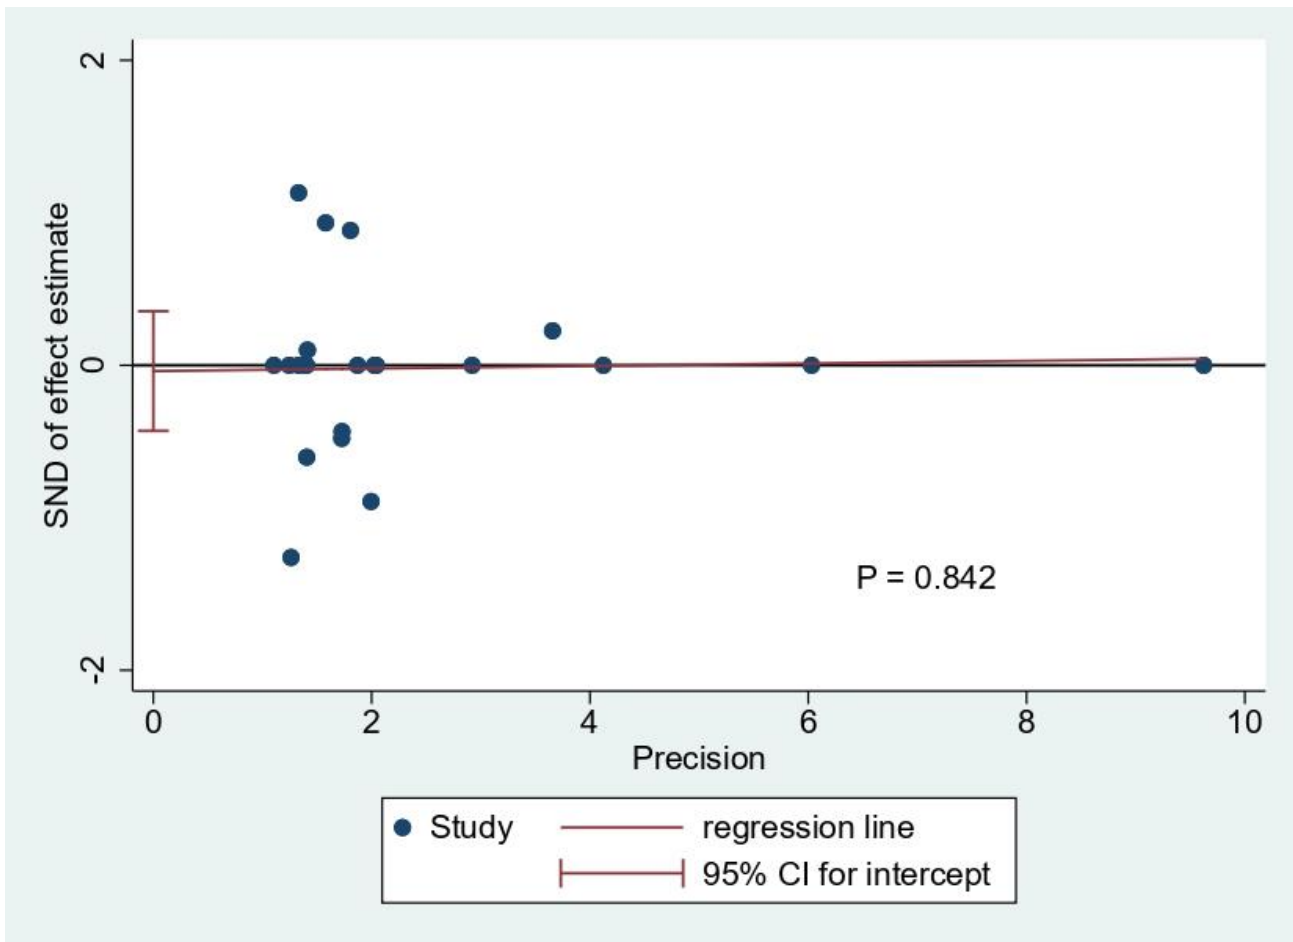

D.

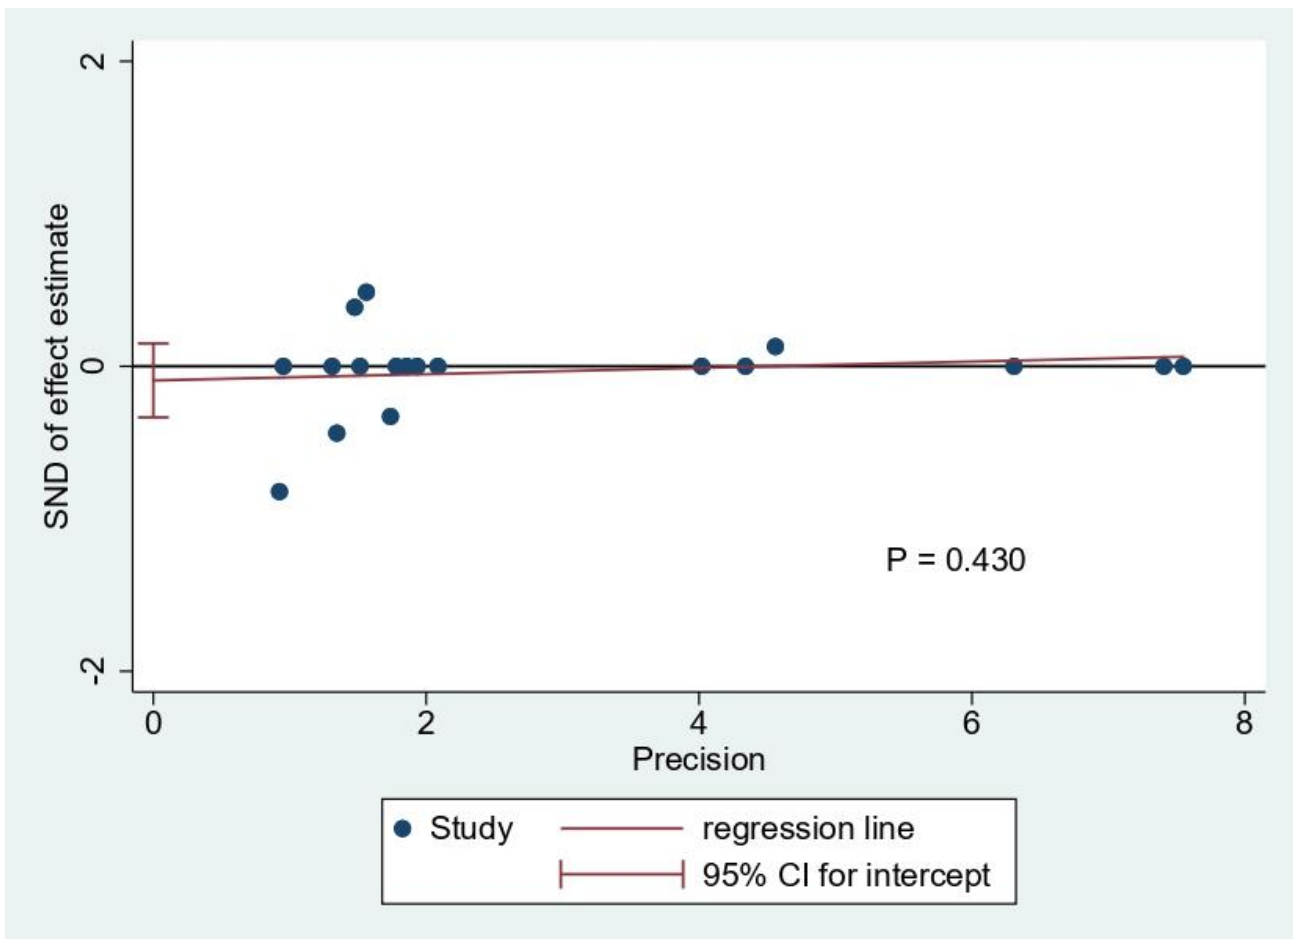

E.

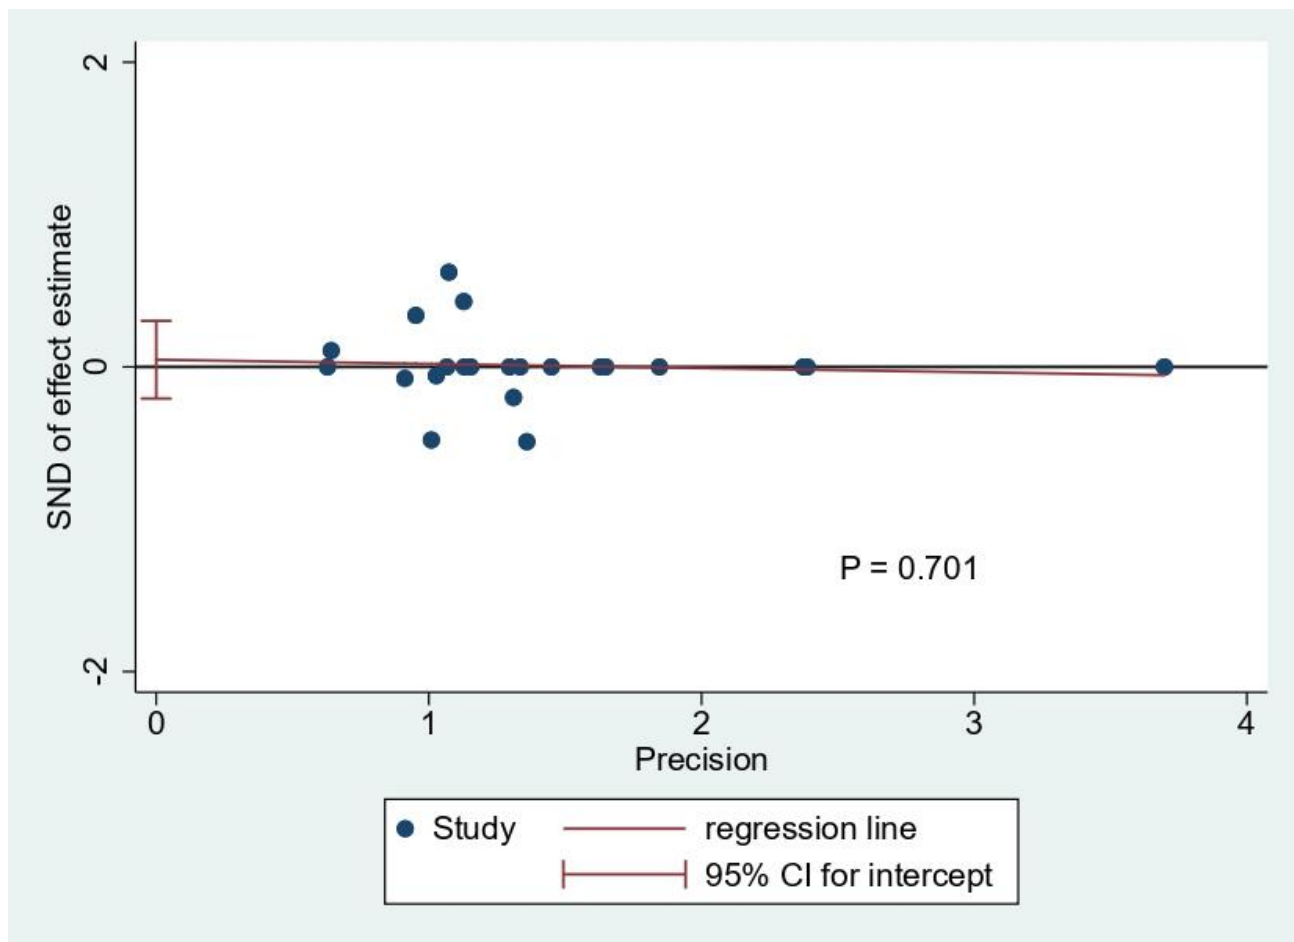

F.

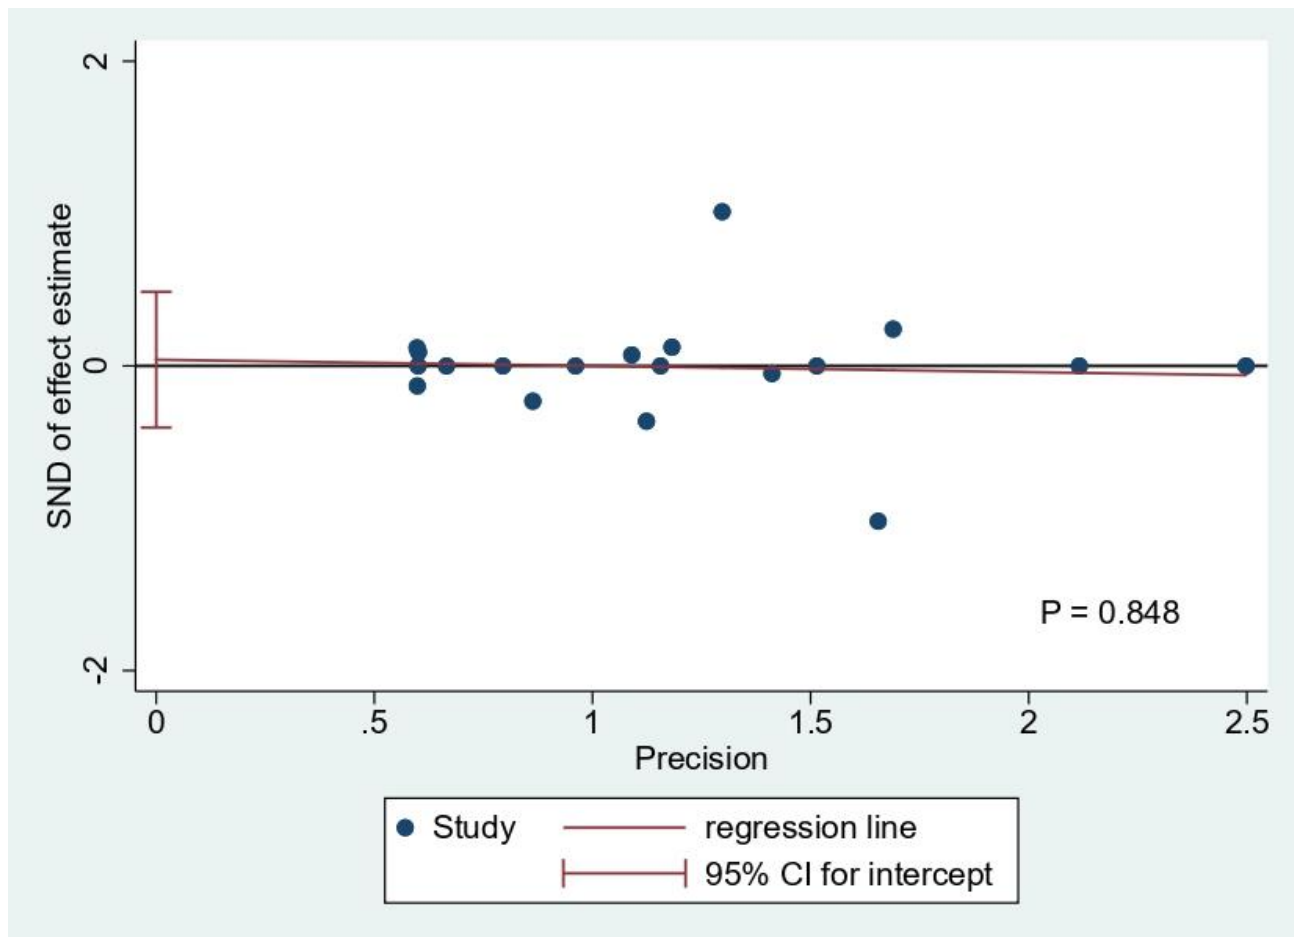

G.

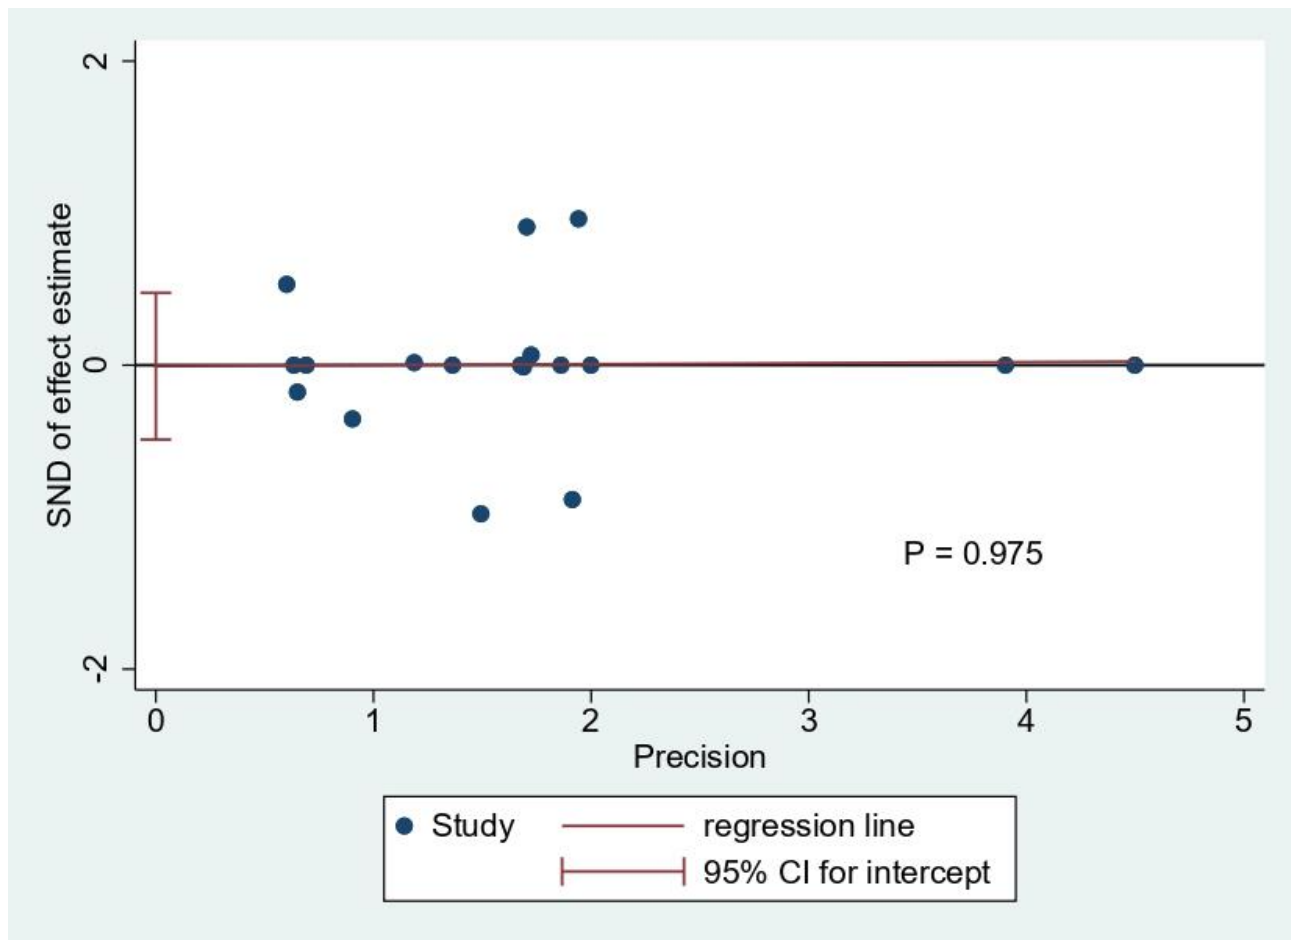

**Supplementary Figure S18.** Egger's test

(A) pain intensity at 4 hours after surgery, (B) pain intensity at 8 hours after surgery, (C) pain intensity at 12 hours after surgery, (D) pain intensity at 24 hours after surgery, (E) nausea/vomiting, (F) pruritus, and (G) sedation/drowsiness.

**Supplementary Table S11.** GRADE approach for rating the quality of evidence

## A. Pain intensity at 4 hours after surgery

| Comparison                            | Direct evidence                           |                     | Indirect evidence                         |                     | Network evidence                          |                     |
|---------------------------------------|-------------------------------------------|---------------------|-------------------------------------------|---------------------|-------------------------------------------|---------------------|
|                                       | Mean difference (95% confidence interval) | Quality of evidence | Mean difference (95% confidence interval) | Quality of evidence | Mean difference (95% confidence interval) | Quality of evidence |
| IVPCA morphine vs. IVPCA fentanyl     | -                                         | -                   | -0.11 (-0.99 to 0.77)                     | Moderate            | -0.11 (-0.99 to 0.77)                     | Moderate            |
| IVPCA morphine vs. IVPCA meperidine   | -0.71 (-2.40 to 0.98)                     | Moderate            | -0.33 (-1.43 to 0.77)                     | Moderate            | -0.44 (-1.36 to 0.48)                     | Moderate            |
| IVPCA morphine vs. IVPCA oxymorphone  | -0.40 (-1.04 to 0.24)                     | Low                 | 0.50 (-2.62 to 3.63)                      | Moderate            | -0.36 (-0.99 to 0.26)                     | Moderate            |
| IVPCA morphine vs. IVPCA sufentanil   | -                                         | -                   | -0.49 (-1.62 to 0.64)                     | Very low            | -0.49 (-1.62 to 0.64)                     | Very low            |
| IVPCA morphine vs. IVPCA tramadol     | -                                         | -                   | -0.41 (-1.47 to 0.65)                     | Low                 | -0.41 (-1.47 to 0.65)                     | Low                 |
| IVPCA morphine vs. PCEA buprenorphine | -                                         | -                   | 0.79 (-0.36 to 1.94)                      | Moderate            | 0.79 (-0.36 to 1.94)                      | Moderate            |
| IVPCA morphine vs. PCEA fentanyl      | 0.78 (0.36 to 1.20)                       | High                | 0.26 (-1.54 to 2.05)                      | Moderate            | 0.75 (0.34 to 1.16)                       | High                |
| IVPCA morphine vs. PCEA meperidine    | -                                         | -                   | 1.45 (0.42 to 2.48)                       | High                | 1.45 (0.42 to 2.48)                       | High                |
| IVPCA fentanyl vs. IVPCA meperidine   | -0.66 (-2.26 to 0.94)                     | Moderate            | -0.07 (-1.51 to 1.38)                     | Moderate            | -0.33 (-1.40 to 0.74)                     | Moderate            |
| IVPCA fentanyl vs. IVPCA oxymorphone  | -                                         | -                   | -0.26 (-1.31 to 0.79)                     | Moderate            | -0.26 (-1.31 to 0.79)                     | Moderate            |
| IVPCA fentanyl vs. IVPCA sufentanil   | -                                         | -                   | -0.38 (-1.08 to 0.32)                     | Low                 | -0.38 (-1.08 to 0.32)                     | Low                 |
| IVPCA fentanyl vs. IVPCA              | -0.30 (-0.90 to 0.30)                     | Low                 | -                                         | -                   | -0.30 (-0.90 to 0.30)                     | Low                 |

|                                          |                      |          |                       |          |                       |          |
|------------------------------------------|----------------------|----------|-----------------------|----------|-----------------------|----------|
| tramadol                                 |                      |          |                       |          |                       |          |
| IVPCA fentanyl vs. PCEA buprenorphine    | -                    | -        | 0.90 (-0.43 to 2.24)  | Moderate | 0.90 (-0.43 to 2.24)  | Moderate |
| IVPCA fentanyl vs. PCEA fentanyl         | 0.82 (0.02 to 1.63)  | High     | 2.15 (-2.46 to 6.76)  | Moderate | 0.86 (0.07 to 1.66)   | High     |
| IVPCA fentanyl vs. PCEA meperidine       | 1.17 (-0.34 to 2.69) | Moderate | 2.02 (0.36 to 3.67)   | High     | 1.56 (0.44 to 2.68)   | High     |
| IVPCA meperidine vs. IVPCA oxymorphone   | 0.34 (-1.18 to 1.86) | Moderate | -0.13 (-1.48 to 1.22) | Low      | 0.08 (-0.93 to 1.09)  | Moderate |
| IVPCA meperidine vs. IVPCA sufentanil    | -                    | -        | -0.05 (-1.33 to 1.23) | Low      | -0.05 (-1.33 to 1.23) | Low      |
| IVPCA meperidine vs. IVPCA tramadol      | -                    | -        | 0.03 (-1.19 to 1.26)  | Low      | 0.03 (-1.19 to 1.26)  | Low      |
| IVPCA meperidine vs. PCEA buprenorphine  | -                    | -        | 1.24 (-0.17 to 2.64)  | Moderate | 1.24 (-0.17 to 2.64)  | Moderate |
| IVPCA meperidine vs. PCEA fentanyl       | 0.67 (-0.74 to 2.07) | Moderate | 1.57 (0.39 to 2.76)   | High     | 1.20 (0.29 to 2.10)   | High     |
| IVPCA meperidine vs. PCEA meperidine     | 1.83 (0.97 to 2.68)  | Moderate | 2.72 (-0.31 to 5.74)  | Moderate | 1.89 (1.07 to 2.72)   | High     |
| IVPCA oxymorphone vs. IVPCA sufentanil   | -                    | -        | -0.12 (-1.39 to 1.14) | Very low | -0.12 (-1.39 to 1.14) | Very low |
| IVPCA oxymorphone vs. IVPCA tramadol     | -                    | -        | -0.04 (-1.25 to 1.16) | Low      | -0.04 (-1.25 to 1.16) | Low      |
| IVPCA oxymorphone vs. PCEA buprenorphine | -                    | -        | 1.16 (-0.14 to 2.46)  | Low      | 1.16 (-0.14 to 2.46)  | Low      |
| IVPCA oxymorphone vs. PCEA fentanyl      | -                    | -        | 1.12 (0.39 to 1.85)   | Moderate | 1.12 (0.39 to 1.85)   | Moderate |
| IVPCA oxymorphone vs.                    | -                    | -        | 1.82 (0.68 to 2.95)   | Moderate | 1.82 (0.68 to 2.95)   | Moderate |

|                                         |                       |          |                      |          |                       |          |
|-----------------------------------------|-----------------------|----------|----------------------|----------|-----------------------|----------|
| PCEA meperidine                         |                       |          |                      |          |                       |          |
| IVPCA sufentanil vs. IVPCA tramadol     | 0.08 (-0.29 to 0.45)  | Moderate | -                    | -        | 0.08 (-0.29 to 0.45)  | Moderate |
| IVPCA sufentanil vs. PCEA buprenorphine | -                     | -        | 1.28 (-0.23 to 2.79) | Very low | 1.28 (-0.23 to 2.79)  | Very low |
| IVPCA sufentanil vs. PCEA fentanyl      | -                     | -        | 1.24 (0.18 to 2.30)  | Moderate | 1.24 (0.18 to 2.30)   | Moderate |
| IVPCA sufentanil vs. PCEA meperidine    | -                     | -        | 1.94 (0.62 to 3.26)  | Moderate | 1.94 (0.62 to 3.26)   | Moderate |
| IVPCA tramadol vs. PCEA buprenorphine   | -                     | -        | 1.20 (-0.26 to 2.67) | Low      | 1.20 (-0.26 to 2.67)  | Low      |
| IVPCA tramadol vs. PCEA fentanyl        | -                     | -        | 1.16 (0.17 to 2.16)  | Moderate | 1.16 (0.17 to 2.16)   | Moderate |
| IVPCA tramadol vs. PCEA meperidine      | -                     | -        | 1.86 (0.59 to 3.13)  | Moderate | 1.86 (0.59 to 3.13)   | Moderate |
| PCEA buprenorphine vs. PCEA fentanyl    | -0.04 (-1.12 to 1.03) | Moderate | -                    | -        | -0.04 (-1.12 to 1.03) | Moderate |
| PCEA buprenorphine vs. PCEA meperidine  | -                     | -        | 0.66 (-0.81 to 2.12) | Moderate | 0.66 (-0.81 to 2.12)  | Moderate |
| PCEA fentanyl vs. PCEA meperidine       | 1.17 (-0.14 to 2.48)  | Moderate | 0.05 (-1.47 to 1.58) | Moderate | 0.70 (-0.30 to 1.69)  | Moderate |

IVPCA: intravenous patient-controlled analgesia; PCEA: patient-controlled epidural analgesia

#### B. Pain intensity at 8 hours after surgery

| Comparison               | Direct evidence                           |                     | Indirect evidence                         |                     | Network evidence                          |                     |
|--------------------------|-------------------------------------------|---------------------|-------------------------------------------|---------------------|-------------------------------------------|---------------------|
|                          | Mean difference (95% confidence interval) | Quality of evidence | Mean difference (95% confidence interval) | Quality of evidence | Mean difference (95% confidence interval) | Quality of evidence |
| IVPCA morphine vs. IVPCA | -                                         | -                   | -0.33 (-1.32 to 0.66)                     | Moderate            | -0.33 (-1.32 to 0.66)                     | Moderate            |



|                                       |                       |          |                       |          |                       |          |
|---------------------------------------|-----------------------|----------|-----------------------|----------|-----------------------|----------|
| fentanyl                              |                       |          |                       |          |                       |          |
| IVPCA morphine vs. IVPCA meperidine   | -0.68 (-2.45 to 1.09) | Moderate | 0.14 (-0.88 to 1.15)  | Moderate | -0.07 (-0.95 to 0.82) | Moderate |
| IVPCA morphine vs. IVPCA oxymorphone  | -0.19 (-0.89 to 0.52) | Low      | 1.25 (-1.43 to 3.92)  | Moderate | -0.09 (-0.78 to 0.59) | Moderate |
| IVPCA morphine vs. IVPCA sufentanil   | -                     | -        | 0.11 (-1.13 to 1.35)  | Very low | 0.11 (-1.13 to 1.35)  | Very low |
| IVPCA morphine vs. IVPCA tramadol     | -                     | -        | 0.01 (-1.17 to 1.19)  | Moderate | 0.01 (-1.17 to 1.19)  | Low      |
| IVPCA morphine vs. PCEA buprenorphine | -                     | -        | 1.25 (0.08 to 2.43)   | High     | 1.25 (0.08 to 2.43)   | High     |
| IVPCA morphine vs. PCEA fentanyl      | 1.06 (0.36 to 1.77)   | High     | 0.12 (-1.57 to 1.81)  | High     | 0.93 (0.28 to 1.57)   | High     |
| IVPCA morphine vs. PCEA meperidine    | -                     | -        | 1.33 (0.36 to 2.30)   | High     | 1.33 (0.36 to 2.30)   | High     |
| IVPCA morphine vs. PCEA sufentanil    | -                     | -        | 0.59 (-0.07 to 1.25)  | Moderate | 0.59 (-0.07 to 1.25)  | Moderate |
| IVPCA fentanyl vs. IVPCA meperidine   | -0.08 (-1.49 to 1.34) | Moderate | 0.56 (-0.75 to 1.87)  | Moderate | 0.27 (-0.70 to 1.23)  | Moderate |
| IVPCA fentanyl vs. IVPCA oxymorphone  | -                     | -        | 0.24 (-0.91 to 1.38)  | Moderate | 0.24 (-0.91 to 1.38)  | Moderate |
| IVPCA fentanyl vs. IVPCA sufentanil   | -                     | -        | 0.44 (-0.30 to 1.19)  | Low      | 0.44 (-0.30 to 1.19)  | Low      |
| IVPCA fentanyl vs. IVPCA tramadol     | 0.34 (-0.30 to 0.98)  | Low      | -                     | -        | 0.34 (-0.30 to 0.98)  | Low      |
| IVPCA fentanyl vs. PCEA buprenorphine | -                     | -        | 1.58 (0.33 to 2.84)   | High     | 1.58 (0.33 to 2.84)   | High     |
| IVPCA fentanyl vs. PCEA               | 1.21 (0.43 to 1.99)   | High     | 4.76 (-2.04 to 11.57) | Moderate | 1.26 (0.48 to 2.03)   | High     |

|                                          |                      |          |                       |          |                       |          |
|------------------------------------------|----------------------|----------|-----------------------|----------|-----------------------|----------|
| fentanyl                                 |                      |          |                       |          |                       |          |
| IVPCA fentanyl vs. PCEA meperidine       | 1.09 (-0.38 to 2.56) | Moderate | 2.18 (0.77 to 3.59)   | High     | 1.66 (0.64 to 2.68)   | High     |
| IVPCA fentanyl vs. PCEA sufentanil       | -                    | -        | 0.92 (0.13 to 1.71)   | High     | 0.92 (0.13 to 1.71)   | High     |
| IVPCA meperidine vs. IVPCA oxymorphone   | 0.47 (-1.02 to 1.96) | Moderate | -0.44 (-1.79 to 0.91) | Low      | -0.03 (-1.03 to 0.97) | Moderate |
| IVPCA meperidine vs. IVPCA sufentanil    | -                    | -        | 0.18 (-1.04 to 1.40)  | Low      | 0.18 (-1.04 to 1.40)  | Low      |
| IVPCA meperidine vs. IVPCA tramadol      | -                    | -        | 0.07 (-1.08 to 1.23)  | Low      | 0.07 (-1.08 to 1.23)  | Low      |
| IVPCA meperidine vs. PCEA buprenorphine  | -                    | -        | 1.32 (0.08 to 2.56)   | High     | 1.32 (0.08 to 2.56)   | High     |
| IVPCA meperidine vs. PCEA fentanyl       | 0.50 (-0.47 to 1.46) | Moderate | 1.79 (0.57 to 3.02)   | High     | 0.99 (0.23 to 1.75)   | High     |
| IVPCA meperidine vs. PCEA meperidine     | 1.36 (0.78 to 1.94)  | Moderate | 3.77 (-0.84 to 8.39)  | Moderate | 1.40 (0.82 to 1.97)   | High     |
| IVPCA meperidine vs. PCEA sufentanil     | -                    | -        | 0.66 (-0.11 to 1.43)  | Moderate | 0.66 (-0.11 to 1.43)  | Moderate |
| IVPCA oxymorphone vs. IVPCA sufentanil   | -                    | -        | 0.21 (-1.16 to 1.58)  | Very low | 0.21 (-1.16 to 1.58)  | Very low |
| IVPCA oxymorphone vs. IVPCA tramadol     | -                    | -        | 0.10 (-1.21 to 1.42)  | Low      | 0.10 (-1.21 to 1.42)  | Low      |
| IVPCA oxymorphone vs. PCEA buprenorphine | -                    | -        | 1.35 (0.02 to 2.67)   | Moderate | 1.35 (0.02 to 2.67)   | Moderate |
| IVPCA oxymorphone vs. PCEA fentanyl      | -                    | -        | 1.02 (0.13 to 1.91)   | Moderate | 1.02 (0.13 to 1.91)   | Moderate |
| IVPCA oxymorphone vs.                    | -                    | -        | 1.43 (0.33 to 2.52)   | Moderate | 1.43 (0.33 to 2.52)   | Moderate |

|                                         |                       |          |                       |          |                       |          |
|-----------------------------------------|-----------------------|----------|-----------------------|----------|-----------------------|----------|
| PCEA meperidine                         |                       |          |                       |          |                       |          |
| IVPCA oxymorphone vs. PCEA sufentanil   | -                     | -        | 0.69 (-0.21 to 1.58)  | Very low | 0.69 (-0.21 to 1.58)  | Very low |
| IVPCA sufentanil vs. IVPCA tramadol     | -0.10 (-0.49 to 0.29) | Moderate | -                     | -        | -0.10 (-0.49 to 0.29) | Moderate |
| IVPCA sufentanil vs. PCEA buprenorphine | -                     | -        | 1.14 (-0.32 to 2.60)  | Very low | 1.14 (-0.32 to 2.60)  | Very low |
| IVPCA sufentanil vs. PCEA fentanyl      | -                     | -        | 0.81 (-0.27 to 1.89)  | Low      | 0.81 (-0.27 to 1.89)  | Low      |
| IVPCA sufentanil vs. PCEA meperidine    | -                     | -        | 1.22 (-0.05 to 2.48)  | Low      | 1.22 (-0.05 to 2.48)  | Low      |
| IVPCA sufentanil vs. PCEA sufentanil    | -                     | -        | 0.48 (-0.61 to 1.57)  | Very low | 0.48 (-0.61 to 1.57)  | Very low |
| IVPCA tramadol vs. PCEA buprenorphine   | -                     | -        | 1.24 (-0.16 to 2.65)  | Low      | 1.24 (-0.16 to 2.65)  | Low      |
| IVPCA tramadol vs. PCEA fentanyl        | -                     | -        | 0.92 (-0.09 to 1.92)  | Low      | 0.92 (-0.09 to 1.92)  | Low      |
| IVPCA tramadol vs. PCEA meperidine      | -                     | -        | 1.32 (0.12 to 2.52)   | Moderate | 1.32 (0.12 to 2.52)   | Moderate |
| IVPCA tramadol vs. PCEA sufentanil      | -                     | -        | 0.58 (-0.43 to 1.60)  | Low      | 0.58 (-0.43 to 1.60)  | Low      |
| PCEA buprenorphine vs. PCEA fentanyl    | -0.33 (-1.31 to 0.65) | Moderate | -                     | -        | -0.33 (-1.31 to 0.65) | Moderate |
| PCEA buprenorphine vs. PCEA meperidine  | -                     | -        | 0.08 (-1.21 to 1.37)  | Moderate | 0.08 (-1.21 to 1.37)  | Moderate |
| PCEA buprenorphine vs. PCEA sufentanil  | -                     | -        | -0.66 (-1.65 to 0.33) | Moderate | -0.66 (-1.65 to 0.33) | Moderate |
| PCEA fentanyl vs. PCEA                  | 0.67 (-0.38 to 1.72)  | Moderate | -0.06 (-1.45 to 1.33) | Low      | 0.41 (-0.43 to 1.24)  | Moderate |

|                                     |                        |      |                       |          |                        |          |
|-------------------------------------|------------------------|------|-----------------------|----------|------------------------|----------|
| meperidine                          |                        |      |                       |          |                        |          |
| PCEA fentanyl vs. PCEA sufentanil   | -0.33 (-0.46 to -0.20) | High | -                     | -        | -0.33 (-0.46 to -0.20) | High     |
| PCEA meperidine vs. PCEA sufentanil | -                      | -    | -0.74 (-1.59 to 0.11) | Moderate | -0.74 (-1.59 to 0.11)  | Moderate |

IVPCA: intravenous patient-controlled analgesia; PCEA: patient-controlled epidural analgesia

### C. Pain intensity at 12 hours after surgery

| Comparison                           | Direct evidence                           |                     | Indirect evidence                         |                     | Network evidence                          |                     |
|--------------------------------------|-------------------------------------------|---------------------|-------------------------------------------|---------------------|-------------------------------------------|---------------------|
|                                      | Mean difference (95% confidence interval) | Quality of evidence | Mean difference (95% confidence interval) | Quality of evidence | Mean difference (95% confidence interval) | Quality of evidence |
| IVPCA morphine vs. IVPCA fentanyl    | -                                         | -                   | -2.21 (-3.26 to -1.15)                    | High                | -2.21 (-3.26 to -1.15)                    | High                |
| IVPCA morphine vs. IVPCA meperidine  | -0.91 (-1.96 to 0.14)                     | Moderate            | -1.35 (-2.31 to -0.38)                    | High                | -1.15 (-1.86 to -0.44)                    | High                |
| IVPCA morphine vs. IVPCA oxymorphone | -1.03 (-1.51 to -0.54)                    | Moderate            | -1.44 (-4.04 to 1.16)                     | Moderate            | -1.04 (-1.52 to -0.57)                    | High                |
| IVPCA morphine vs. IVPCA sufentanil  | -                                         | -                   | -1.75 (-3.04 to -0.47)                    | Low                 | -1.75 (-3.04 to -0.47)                    | Low                 |
| IVPCA morphine vs. IVPCA tramadol    | -                                         | -                   | -1.67 (-2.91 to -0.42)                    | Moderate            | -1.67 (-2.91 to -0.42)                    | Moderate            |
| IVPCA morphine vs. PCEA fentanyl     | -0.06 (-1.03 to 0.91)                     | Moderate            | -0.1 (-1.08 to 0.87)                      | Moderate            | -0.08 (-0.77 to 0.61)                     | Moderate            |
| IVPCA morphine vs. PCEA meperidine   | -                                         | -                   | -0.23 (-1.03 to 0.57)                     | Low                 | -0.23 (-1.03 to 0.57)                     | Low                 |
| IVPCA morphine vs. PCEA sufentanil   | -0.04 (-1.50 to 1.42)                     | Low                 | 0.33 (-0.58 to 1.23)                      | Moderate            | 0.22 (-0.54 to 0.99)                      | Moderate            |
| IVPCA morphine vs. PCEA              | -                                         | -                   | 0.11 (-1.64 to 1.86)                      | Low                 | 0.11 (-1.64 to 1.86)                      | Low                 |

|                                        |                      |          |                        |          |                        |          |
|----------------------------------------|----------------------|----------|------------------------|----------|------------------------|----------|
| tramadol                               |                      |          |                        |          |                        |          |
| IVPCA morphine vs. IVPCA hydromorphone | -                    | -        | -1.67 (-2.93 to -0.40) | Low      | -1.67 (-2.93 to -0.40) | Low      |
| IVPCA fentanyl vs. IVPCA meperidine    | 0.18 (-1.60 to 1.95) | Moderate | 1.52 (0.24 to 2.81)    | High     | 1.06 (0.02 to 2.10)    | High     |
| IVPCA fentanyl vs. IVPCA oxymorphone   | -                    | -        | 1.16 (0.05 to 2.28)    | High     | 1.16 (0.05 to 2.28)    | High     |
| IVPCA fentanyl vs. IVPCA sufentanil    | -                    | -        | 0.45 (-0.29 to 1.20)   | Low      | 0.45 (-0.29 to 1.20)   | Low      |
| IVPCA fentanyl vs. IVPCA tramadol      | 0.54 (-0.13 to 1.21) | Low      | -                      | -        | 0.54 (-0.13 to 1.21)   | Low      |
| IVPCA fentanyl vs. PCEA fentanyl       | 2.09 (1.24 to 2.93)  | High     | 3.78 (-1.71 to 9.28)   | Moderate | 2.12 (1.29 to 2.96)    | High     |
| IVPCA fentanyl vs. PCEA meperidine     | 1.60 (0.13 to 3.07)  | High     | 2.28 (0.95 to 3.61)    | Moderate | 1.97 (0.99 to 2.96)    | High     |
| IVPCA fentanyl vs. PCEA sufentanil     | -                    | -        | 2.43 (1.48 to 3.38)    | High     | 2.43 (1.48 to 3.38)    | High     |
| IVPCA fentanyl vs. PCEA tramadol       | -                    | -        | 2.32 (0.48 to 4.16)    | High     | 2.32 (0.48 to 4.16)    | High     |
| IVPCA fentanyl vs. IVPCA hydromorphone | -                    | -        | 0.54 (-0.16 to 1.24)   | Low      | 0.54 (-0.16 to 1.24)   | Low      |
| IVPCA meperidine vs. IVPCA oxymorphone | 0.16 (-0.80 to 1.12) | Moderate | 0.02 (-1.16 to 1.2)    | Low      | 0.10 (-0.64 to 0.85)   | Moderate |
| IVPCA meperidine vs. IVPCA sufentanil  | -                    | -        | -0.61 (-1.89 to 0.67)  | Low      | -0.61 (-1.89 to 0.67)  | Low      |
| IVPCA meperidine vs. IVPCA tramadol    | -                    | -        | -0.52 (-1.76 to 0.72)  | Low      | -0.52 (-1.76 to 0.72)  | Low      |
| IVPCA meperidine vs. PCEA              | 1.07 (-0.33 to 2.46) | Moderate | 1.06 (0.21 to 1.91)    | High     | 1.06 (0.34 to 1.79)    | High     |

|                                           |                      |          |                       |          |                       |          |
|-------------------------------------------|----------------------|----------|-----------------------|----------|-----------------------|----------|
| fentanyl                                  |                      |          |                       |          |                       |          |
| IVPCA meperidine vs. PCEA meperidine      | 0.99 (0.31 to 1.67)  | Moderate | 0.49 (-1.12 to 2.1)   | Moderate | 0.91 (0.28 to 1.54)   | High     |
| IVPCA meperidine vs. PCEA sufentanil      | -                    | -        | 1.37 (0.54 to 2.20)   | High     | 1.37 (0.54 to 2.20)   | High     |
| IVPCA meperidine vs. PCEA tramadol        | -                    | -        | 1.26 (-0.52 to 3.04)  | Moderate | 1.26 (-0.52 to 3.04)  | Moderate |
| IVPCA meperidine vs. IVPCA hydromorphone  | -                    | -        | -0.52 (-1.78 to 0.74) | Low      | -0.52 (-1.78 to 0.74) | Low      |
| IVPCA oxymorphone vs. IVPCA sufentanil    | -                    | -        | -0.71 (-2.05 to 0.63) | Very low | -0.71 (-2.05 to 0.63) | Very low |
| IVPCA oxymorphone vs. IVPCA tramadol      | -                    | -        | -0.62 (-1.92 to 0.68) | Low      | -0.62 (-1.92 to 0.68) | Low      |
| IVPCA oxymorphone vs. PCEA fentanyl       | -                    | -        | 0.96 (0.17 to 1.75)   | Moderate | 0.96 (0.17 to 1.75)   | Moderate |
| IVPCA oxymorphone vs. PCEA meperidine     | -                    | -        | 0.81 (-0.05 to 1.67)  | Low      | 0.81 (-0.05 to 1.67)  | Low      |
| IVPCA oxymorphone vs. PCEA sufentanil     | -                    | -        | 1.27 (0.40 to 2.13)   | Moderate | 1.27 (0.40 to 2.13)   | Moderate |
| IVPCA oxymorphone vs. PCEA tramadol       | -                    | -        | 1.15 (-0.64 to 2.95)  | Low      | 1.15 (-0.64 to 2.95)  | Low      |
| IVPCA oxymorphone vs. IVPCA hydromorphone | -                    | -        | -0.62 (-1.94 to 0.69) | Very low | -0.62 (-1.94 to 0.69) | Very low |
| IVPCA sufentanil vs. IVPCA tramadol       | 0.09 (-0.24 to 0.41) | Moderate | -                     | -        | 0.09 (-0.24 to 0.41)  | Moderate |
| IVPCA sufentanil vs. PCEA fentanyl        | -                    | -        | 1.67 (0.55 to 2.79)   | Moderate | 1.67 (0.55 to 2.79)   | Moderate |
| IVPCA sufentanil vs. PCEA                 | -                    | -        | 1.52 (0.29 to 2.76)   | Low      | 1.52 (0.29 to 2.76)   | Low      |

|                                          |                       |          |                        |          |                        |          |
|------------------------------------------|-----------------------|----------|------------------------|----------|------------------------|----------|
| meperidine                               |                       |          |                        |          |                        |          |
| IVPCA sufentanil vs. PCEA sufentanil     | -                     | -        | 1.98 (0.77 to 3.19)    | Low      | 1.98 (0.77 to 3.19)    | Low      |
| IVPCA sufentanil vs. PCEA tramadol       | -                     | -        | 1.87 (-0.12 to 3.85)   | Very low | 1.87 (-0.12 to 3.85)   | Very low |
| IVPCA sufentanil vs. IVPCA hydromorphone | -                     | -        | 0.09 (-0.30 to 0.47)   | Moderate | 0.09 (-0.30 to 0.47)   | Moderate |
| IVPCA tramadol vs. PCEA fentanyl         | -                     | -        | 1.58 (0.51 to 2.66)    | Moderate | 1.58 (0.51 to 2.66)    | Moderate |
| IVPCA tramadol vs. PCEA meperidine       | -                     | -        | 1.43 (0.24 to 2.63)    | Moderate | 1.43 (0.24 to 2.63)    | Moderate |
| IVPCA tramadol vs. PCEA sufentanil       | -                     | -        | 1.89 (0.73 to 3.05)    | Moderate | 1.89 (0.73 to 3.05)    | Moderate |
| IVPCA tramadol vs. PCEA tramadol         | -                     | -        | 1.78 (-0.18 to 3.74)   | Very low | 1.78 (-0.18 to 3.74)   | Very low |
| IVPCA tramadol vs. IVPCA hydromorphone   | 0.00 (-0.20 to 0.20)  | Moderate | -                      | -        | 0.00 (-0.20 to 0.20)   | Moderate |
| PCEA fentanyl vs. PCEA meperidine        | -0.05 (-0.82 to 0.72) | Low      | -0.44 (-1.73 to 0.85)  | Low      | -0.15 (-0.81 to 0.51)  | Low      |
| PCEA fentanyl vs. PCEA sufentanil        | 0.33 (-0.14 to 0.81)  | Moderate | -0.03 (-1.68 to 1.62)  | Low      | 0.31 (-0.15 to 0.76)   | Moderate |
| PCEA fentanyl vs. PCEA tramadol          | -                     | -        | 0.19 (-1.45 to 1.83)   | Moderate | 0.19 (-1.45 to 1.83)   | Moderate |
| PCEA fentanyl vs. IVPCA hydromorphone    | -                     | -        | -1.58 (-2.68 to -0.49) | Moderate | -1.58 (-2.68 to -0.49) | Moderate |
| PCEA meperidine vs. PCEA sufentanil      | -                     | -        | 0.46 (-0.33 to 1.24)   | Low      | 0.46 (-0.33 to 1.24)   | Low      |
| PCEA meperidine vs. PCEA                 | -                     | -        | 0.35 (-1.42 to 2.11)   | Low      | 0.35 (-1.42 to 2.11)   | Low      |

|                                         |                       |          |                        |          |                        |          |
|-----------------------------------------|-----------------------|----------|------------------------|----------|------------------------|----------|
| tramadol                                |                       |          |                        |          |                        |          |
| PCEA meperidine vs. IVPCA hydromorphone | -                     | -        | -1.43 (-2.64 to -0.22) | Moderate | -1.43 (-2.64 to -0.22) | Moderate |
| PCEA sufentanil vs. PCEA tramadol       | -0.11 (-1.69 to 1.46) | Moderate | -                      | -        | -0.11 (-1.69 to 1.46)  | Moderate |
| PCEA sufentanil vs. IVPCA hydromorphone | -                     | -        | -1.89 (-3.07 to -0.71) | Low      | -1.89 (-3.07 to -0.71) | Low      |
| PCEA tramadol vs. IVPCA hydromorphone   | -                     | -        | -1.78 (-3.75 to 0.19)  | Very low | -1.78 (-3.75 to 0.19)  | Very low |

IVPCA: intravenous patient-controlled analgesia; PCEA: patient-controlled epidural analgesia

#### D. Pain intensity at 24 hours after surgery

| Comparison                           | Direct evidence                           |                     | Indirect evidence                         |                     | Network evidence                          |                     |
|--------------------------------------|-------------------------------------------|---------------------|-------------------------------------------|---------------------|-------------------------------------------|---------------------|
|                                      | Mean difference (95% confidence interval) | Quality of evidence | Mean difference (95% confidence interval) | Quality of evidence | Mean difference (95% confidence interval) | Quality of evidence |
| IVPCA morphine vs. IVPCA fentanyl    | -                                         | -                   | -2.59 (-4.08 to -1.11)                    | Low                 | -2.59 (-4.08 to -1.11)                    | Low                 |
| IVPCA morphine vs. IVPCA meperidine  | -0.86 (-1.80 to 0.08)                     | Moderate            | -1.56 (-3.66 to 0.54)                     | Very low            | -0.98 (-1.83 to -0.12)                    | High                |
| IVPCA morphine vs. IVPCA methadone   | 0.27 (0.00 to 0.53)                       | Low                 | -                                         | -                   | 0.27 (0.00 to 0.53)                       | Low                 |
| IVPCA morphine vs. IVPCA oxymorphone | -1.19 (-1.60 to -0.77)                    | Moderate            | -4.30 (-19.99 to 11.38)                   | Low                 | -1.19 (-1.60 to -0.78)                    | Moderate            |
| IVPCA morphine vs. IVPCA sufentanil  | -                                         | -                   | -2.29 (-3.87 to -0.71)                    | Low                 | -2.29 (-3.87 to -0.71)                    | Low                 |
| IVPCA morphine vs. IVPCA tramadol    | -                                         | -                   | -2.19 (-3.74 to -0.64)                    | Low                 | -2.19 (-3.74 to -0.64)                    | Low                 |
| IVPCA morphine vs. PCEA              | -                                         | -                   | 0.10 (-1.52 to 1.72)                      | Very low            | 0.10 (-1.52 to 1.72)                      | Very low            |



|                                        |                      |      |                        |          |                        |          |
|----------------------------------------|----------------------|------|------------------------|----------|------------------------|----------|
| buprenorphine                          |                      |      |                        |          |                        |          |
| IVPCA morphine vs. PCEA fentanyl       | -                    | -    | -0.19 (-1.40 to 1.02)  | Low      | -0.19 (-1.40 to 1.02)  | Low      |
| IVPCA morphine vs. PCEA meperidine     | -                    | -    | 0.05 (-1.17 to 1.26)   | Very low | 0.05 (-1.17 to 1.26)   | Very low |
| IVPCA morphine vs. PCEA sufentanil     | 0.01 (-1.29 to 1.30) | Low  | 0.57 (-1.96 to 3.10)   | Very low | 0.12 (-1.03 to 1.28)   | Low      |
| IVPCA morphine vs. PCEA tramadol       | -                    | -    | -0.08 (-1.61 to 1.46)  | Very low | -0.08 (-1.61 to 1.46)  | Very low |
| IVPCA morphine vs. PCEA hydromorphone  | -                    | -    | -1.53 (-3.45 to 0.39)  | Very low | -1.53 (-3.45 to 0.39)  | Very low |
| IVPCA morphine vs. IVPCA hydromorphone | -                    | -    | -2.86 (-4.43 to -1.29) | Low      | -2.86 (-4.43 to -1.29) | Low      |
| IVPCA fentanyl vs. IVPCA meperidine    | -                    | -    | 1.62 (0.02 to 3.21)    | Moderate | 1.62 (0.02 to 3.21)    | Moderate |
| IVPCA fentanyl vs. IVPCA methadone     | -                    | -    | 2.86 (1.35 to 4.37)    | Low      | 2.86 (1.35 to 4.37)    | Low      |
| IVPCA fentanyl vs. IVPCA oxymorphone   | -                    | -    | 1.41 (-0.13 to 2.94)   | Very low | 1.41 (-0.13 to 2.94)   | Very low |
| IVPCA fentanyl vs. IVPCA sufentanil    | -                    | -    | 0.30 (-0.24 to 0.85)   | Low      | 0.30 (-0.24 to 0.85)   | Low      |
| IVPCA fentanyl vs. IVPCA tramadol      | 0.40 (-0.05 to 0.85) | Low  | -                      | -        | 0.40 (-0.05 to 0.85)   | Low      |
| IVPCA fentanyl vs. PCEA buprenorphine  | -                    | -    | 2.69 (1.31 to 4.07)    | High     | 2.69 (1.31 to 4.07)    | High     |
| IVPCA fentanyl vs. PCEA fentanyl       | 2.40 (1.54 to 3.26)  | High | -                      | -        | 2.40 (1.54 to 3.26)    | High     |
| IVPCA fentanyl vs. PCEA                | -                    | -    | 2.64 (0.98 to 4.30)    | Moderate | 2.64 (0.98 to 4.30)    | Moderate |

|                                         |                      |          |                       |          |                       |          |
|-----------------------------------------|----------------------|----------|-----------------------|----------|-----------------------|----------|
| meperidine                              |                      |          |                       |          |                       |          |
| IVPCA fentanyl vs. PCEA sufentanil      | -                    | -        | 2.72 (1.73 to 3.70)   | High     | 2.72 (1.73 to 3.70)   | High     |
| IVPCA fentanyl vs. PCEA tramadol        | -                    | -        | 2.52 (1.10 to 3.93)   | Moderate | 2.52 (1.10 to 3.93)   | Moderate |
| IVPCA fentanyl vs. PCEA hydromorphone   | -                    | -        | 1.06 (-0.16 to 2.28)  | Low      | 1.06 (-0.16 to 2.28)  | Low      |
| IVPCA fentanyl vs. IVPCA hydromorphone  | -                    | -        | -0.27 (-0.79 to 0.25) | Low      | -0.27 (-0.79 to 0.25) | Low      |
| IVPCA meperidine vs. IVPCA methadone    | -                    | -        | 1.24 (0.35 to 2.14)   | Moderate | 1.24 (0.35 to 2.14)   | Moderate |
| IVPCA meperidine vs. IVPCA oxymorphone  | 0.00 (-1.50 to 1.50) | Moderate | -0.34 (-1.51 to 0.83) | Very low | -0.21 (-1.13 to 0.71) | Moderate |
| IVPCA meperidine vs. IVPCA sufentanil   | -                    | -        | -1.31 (-3.00 to 0.37) | Very low | -1.31 (-3.00 to 0.37) | Very low |
| IVPCA meperidine vs. IVPCA tramadol     | -                    | -        | -1.22 (-2.88 to 0.44) | Very low | -1.22 (-2.88 to 0.44) | Very low |
| IVPCA meperidine vs. PCEA buprenorphine | -                    | -        | 1.07 (-0.65 to 2.80)  | Low      | 1.07 (-0.65 to 2.80)  | Low      |
| IVPCA meperidine vs. PCEA fentanyl      | -                    | -        | 0.78 (-0.56 to 2.13)  | Low      | 0.78 (-0.56 to 2.13)  | Low      |
| IVPCA meperidine vs. PCEA meperidine    | 1.10 (0.04 to 2.16)  | Moderate | 0.54 (-2.10 to 3.17)  | Very low | 1.02 (0.04 to 2.00)   | Moderate |
| IVPCA meperidine vs. PCEA sufentanil    | -                    | -        | 1.10 (-0.21 to 2.41)  | Low      | 1.10 (-0.21 to 2.41)  | Low      |
| IVPCA meperidine vs. PCEA tramadol      | -                    | -        | 0.90 (-0.76 to 2.56)  | Low      | 0.90 (-0.76 to 2.56)  | Low      |
| IVPCA meperidine vs. PCEA               | -                    | -        | -0.56 (-2.56 to 1.45) | Very low | -0.56 (-2.56 to 1.45) | Very low |

|                                          |   |   |                        |          |                        |          |
|------------------------------------------|---|---|------------------------|----------|------------------------|----------|
| hydromorphone                            |   |   |                        |          |                        |          |
| IVPCA meperidine vs. IVPCA hydromorphone | - | - | -1.88 (-3.56 to -0.20) | Low      | -1.88 (-3.56 to -0.20) | Low      |
| IVPCA methadone vs. IVPCA oxymorphone    | - | - | -1.45 (-1.94 to -0.96) | Moderate | -1.45 (-1.94 to -0.96) | Moderate |
| IVPCA methadone vs. IVPCA sufentanil     | - | - | -2.56 (-4.16 to -0.95) | Low      | -2.56 (-4.16 to -0.95) | Low      |
| IVPCA methadone vs. IVPCA tramadol       | - | - | -2.46 (-4.03 to -0.89) | Low      | -2.46 (-4.03 to -0.89) | Low      |
| IVPCA methadone vs. PCEA buprenorphine   | - | - | -0.17 (-1.81 to 1.47)  | Very low | -0.17 (-1.81 to 1.47)  | Very low |
| IVPCA methadone vs. PCEA fentanyl        | - | - | -0.46 (-1.70 to 0.78)  | Low      | -0.46 (-1.70 to 0.78)  | Low      |
| IVPCA methadone vs. PCEA meperidine      | - | - | -0.22 (-1.46 to 1.02)  | Low      | -0.22 (-1.46 to 1.02)  | Low      |
| IVPCA methadone vs. PCEA sufentanil      | - | - | -0.14 (-1.32 to 1.04)  | Low      | -0.14 (-1.32 to 1.04)  | Low      |
| IVPCA methadone vs. PCEA tramadol        | - | - | -0.34 (-1.90 to 1.21)  | Low      | -0.34 (-1.90 to 1.21)  | Low      |
| IVPCA methadone vs. PCEA hydromorphone   | - | - | -1.80 (-3.73 to 0.14)  | Very low | -1.80 (-3.73 to 0.14)  | Very low |
| IVPCA methadone vs. IVPCA hydromorphone  | - | - | -3.13 (-4.72 to -1.53) | Low      | -3.13 (-4.72 to -1.53) | Low      |
| IVPCA oxymorphone vs. IVPCA sufentanil   | - | - | -1.10 (-2.73 to 0.53)  | Very low | -1.10 (-2.73 to 0.53)  | Very low |
| IVPCA oxymorphone vs. IVPCA tramadol     | - | - | -1.01 (-2.60 to 0.59)  | Very low | -1.01 (-2.60 to 0.59)  | Very low |
| IVPCA oxymorphone vs.                    | - | - | 1.28 (-0.38 to 2.95)   | Very low | 1.28 (-0.38 to 2.95)   | Very low |

|                                           |                      |          |                        |          |                        |          |
|-------------------------------------------|----------------------|----------|------------------------|----------|------------------------|----------|
| PCEA buprenorphine                        |                      |          |                        |          |                        |          |
| IVPCA oxymorphone vs. PCEA fentanyl       | -                    | -        | 1.00 (-0.28 to 2.27)   | Low      | 1.00 (-0.28 to 2.27)   | Low      |
| IVPCA oxymorphone vs. PCEA meperidine     | -                    | -        | 1.23 (-0.03 to 2.50)   | Low      | 1.23 (-0.03 to 2.50)   | Low      |
| IVPCA oxymorphone vs. PCEA sufentanil     | -                    | -        | 1.31 (0.09 to 2.53)    | Moderate | 1.31 (0.09 to 2.53)    | Moderate |
| IVPCA oxymorphone vs. PCEA tramadol       | -                    | -        | 1.11 (-0.47 to 2.70)   | Low      | 1.11 (-0.47 to 2.70)   | Low      |
| IVPCA oxymorphone vs. PCEA hydromorphone  | -                    | -        | -0.34 (-2.30 to 1.61)  | Very low | -0.34 (-2.30 to 1.61)  | Very low |
| IVPCA oxymorphone vs. IVPCA hydromorphone | -                    | -        | -1.67 (-3.29 to -0.05) | Low      | -1.67 (-3.29 to -0.05) | Low      |
| IVPCA sufentanil vs. IVPCA tramadol       | 0.10 (-0.21 to 0.41) | Moderate | -                      | -        | 0.10 (-0.21 to 0.41)   | Moderate |
| IVPCA sufentanil vs. PCEA buprenorphine   | -                    | -        | 2.38 (0.90 to 3.87)    | Moderate | 2.38 (0.90 to 3.87)    | Moderate |
| IVPCA sufentanil vs. PCEA fentanyl        | -                    | -        | 2.10 (1.08 to 3.12)    | Moderate | 2.10 (1.08 to 3.12)    | Moderate |
| IVPCA sufentanil vs. PCEA meperidine      | -                    | -        | 2.33 (0.59 to 4.08)    | Moderate | 2.33 (0.59 to 4.08)    | Moderate |
| IVPCA sufentanil vs. PCEA sufentanil      | -                    | -        | 2.41 (1.29 to 3.54)    | Moderate | 2.41 (1.29 to 3.54)    | Moderate |
| IVPCA sufentanil vs. PCEA tramadol        | -                    | -        | 2.21 (0.70 to 3.73)    | Low      | 2.21 (0.70 to 3.73)    | Low      |
| IVPCA sufentanil vs. PCEA hydromorphone   | -                    | -        | 0.76 (-0.42 to 1.93)   | Low      | 0.76 (-0.42 to 1.93)   | Low      |
| IVPCA sufentanil vs. IVPCA                | -                    | -        | -0.57 (-0.98 to -0.17) | High     | -0.57 (-0.98 to -0.17) | High     |

|                                            |                        |          |                        |          |                        |          |
|--------------------------------------------|------------------------|----------|------------------------|----------|------------------------|----------|
| hydromorphone                              |                        |          |                        |          |                        |          |
| IVPCA tramadol vs. PCEA buprenorphine      | -                      | -        | 2.29 (0.84 to 3.74)    | Moderate | 2.29 (0.84 to 3.74)    | Moderate |
| IVPCA tramadol vs. PCEA fentanyl           | -                      | -        | 2.00 (1.03 to 2.97)    | Moderate | 2.00 (1.03 to 2.97)    | Moderate |
| IVPCA tramadol vs. PCEA meperidine         | -                      | -        | 2.24 (0.52 to 3.96)    | Moderate | 2.24 (0.52 to 3.96)    | Moderate |
| IVPCA tramadol vs. PCEA sufentanil         | -                      | -        | 2.32 (1.23 to 3.40)    | Moderate | 2.32 (1.23 to 3.40)    | Moderate |
| IVPCA tramadol vs. PCEA tramadol           | -                      | -        | 2.12 (0.63 to 3.60)    | Low      | 2.12 (0.63 to 3.60)    | Low      |
| IVPCA tramadol vs. PCEA hydromorphone      | -                      | -        | 0.66 (-0.47 to 1.79)   | Low      | 0.66 (-0.47 to 1.79)   | Low      |
| IVPCA tramadol vs. IVPCA hydromorphone     | -0.67 (-0.93 to -0.41) | High     | -                      | -        | -0.67 (-0.93 to -0.41) | High     |
| PCEA buprenorphine vs. PCEA fentanyl       | -0.29 (-1.37 to 0.79)  | Moderate | -                      | -        | -0.29 (-1.37 to 0.79)  | Moderate |
| PCEA buprenorphine vs. PCEA meperidine     | -                      | -        | -0.05 (-1.83 to 1.73)  | Low      | -0.05 (-1.83 to 1.73)  | Low      |
| PCEA buprenorphine vs. PCEA sufentanil     | -                      | -        | 0.03 (-1.15 to 1.21)   | Moderate | 0.03 (-1.15 to 1.21)   | Moderate |
| PCEA buprenorphine vs. PCEA tramadol       | -                      | -        | -0.17 (-1.73 to 1.39)  | Low      | -0.17 (-1.73 to 1.39)  | Low      |
| PCEA buprenorphine vs. PCEA hydromorphone  | -                      | -        | -1.63 (-3.47 to 0.21)  | Very low | -1.63 (-3.47 to 0.21)  | Very low |
| PCEA buprenorphine vs. IVPCA hydromorphone | -                      | -        | -2.96 (-4.43 to -1.48) | Low      | -2.96 (-4.43 to -1.48) | Low      |
| PCEA fentanyl vs. PCEA                     | -0.06 (-2.11 to 2.00)  | Low      | 0.51 (-1.45 to 2.47)   | Very low | 0.24 (-1.18 to 1.66)   | Low      |

|                                         |                        |          |                        |          |                        |          |
|-----------------------------------------|------------------------|----------|------------------------|----------|------------------------|----------|
| meperidine                              |                        |          |                        |          |                        |          |
| PCEA fentanyl vs. PCEA sufentanil       | 0.33 (-0.15 to 0.82)   | Moderate | -0.23 (-3.03 to 2.57)  | Very low | 0.32 (-0.16 to 0.80)   | Moderate |
| PCEA fentanyl vs. PCEA tramadol         | -                      | -        | 0.12 (-1.00 to 1.24)   | Low      | 0.12 (-1.00 to 1.24)   | Low      |
| PCEA fentanyl vs. PCEA hydromorphone    | -                      | -        | -1.34 (-2.83 to 0.15)  | Very low | -1.34 (-2.83 to 0.15)  | Very low |
| PCEA fentanyl vs. IVPCA hydromorphone   | -                      | -        | -2.67 (-3.67 to -1.66) | Moderate | -2.67 (-3.67 to -1.66) | Moderate |
| PCEA meperidine vs. PCEA sufentanil     | -                      | -        | 0.08 (-1.33 to 1.49)   | Low      | 0.08 (-1.33 to 1.49)   | Low      |
| PCEA meperidine vs. PCEA tramadol       | -                      | -        | -0.12 (-1.86 to 1.62)  | Low      | -0.12 (-1.86 to 1.62)  | Low      |
| PCEA meperidine vs. PCEA hydromorphone  | -                      | -        | -1.58 (-3.64 to 0.48)  | Very low | -1.58 (-3.64 to 0.48)  | Very low |
| PCEA meperidine vs. IVPCA hydromorphone | -                      | -        | -2.91 (-4.64 to -1.17) | Low      | -2.91 (-4.64 to -1.17) | Low      |
| PCEA sufentanil vs. PCEA tramadol       | -0.20 (-1.21 to 0.81)  | Low      | -                      | -        | -0.20 (-1.21 to 0.81)  | Low      |
| PCEA sufentanil vs. PCEA hydromorphone  | -                      | -        | -1.66 (-3.22 to -0.09) | Low      | -1.66 (-3.22 to -0.09) | Low      |
| PCEA sufentanil vs. IVPCA hydromorphone | -                      | -        | -2.98 (-4.10 to -1.87) | Low      | -2.98 (-4.10 to -1.87) | Low      |
| PCEA tramadol vs. PCEA hydromorphone    | -                      | -        | -1.46 (-3.32 to 0.41)  | Very low | -1.46 (-3.32 to 0.41)  | Very low |
| PCEA tramadol vs. IVPCA hydromorphone   | -                      | -        | -2.78 (-4.29 to -1.28) | Low      | -2.78 (-4.29 to -1.28) | Low      |
| PCEA hydromorphone vs.                  | -1.33 (-2.43 to -0.23) | Low      | -                      | -        | -1.33 (-2.43 to -0.23) | Low      |

|                     |  |  |  |  |  |  |
|---------------------|--|--|--|--|--|--|
| IVPCA hydromorphone |  |  |  |  |  |  |
|---------------------|--|--|--|--|--|--|

IVPCA: intravenous patient-controlled analgesia; PCEA: patient-controlled epidural analgesia

#### E. Nausea/vomiting

| Comparison                            | Direct evidence                      |                     | Indirect evidence                    |                     | Network evidence                     |                     |
|---------------------------------------|--------------------------------------|---------------------|--------------------------------------|---------------------|--------------------------------------|---------------------|
|                                       | Odds ratio (95% confidence interval) | Quality of evidence | Odds ratio (95% confidence interval) | Quality of evidence | Odds ratio (95% confidence interval) | Quality of evidence |
| IVPCA morphine vs. IVPCA fentanyl     | 0.41 (0.07 to 2.59)                  | Moderate            | 1.22 (0.22 to 6.67)                  | Moderate            | 0.74 (0.21 to 2.57)                  | Moderate            |
| IVPCA morphine vs. IVPCA meperidine   | 1.50 (0.54 to 4.17)                  | Low                 | 1.89 (0.11 to 33.33)                 | Low                 | 1.54 (0.59 to 4.03)                  | Low                 |
| IVPCA morphine vs. IVPCA meptazinol   | 0.25 (0.06 to 1.09)                  | Moderate            | -                                    | -                   | 0.25 (0.06 to 1.09)                  | Moderate            |
| IVPCA morphine vs. IVPCA methadone    | 1.13 (0.34 to 3.77)                  | Low                 | -                                    | -                   | 1.13 (0.34 to 3.77)                  | Low                 |
| IVPCA morphine vs. IVPCA oxymorphone  | 0.38 (0.11 to 1.41)                  | Low                 | 0.48 (0.03 to 8.33)                  | Low                 | 0.40 (0.12 to 1.30)                  | Low                 |
| IVPCA morphine vs. IVPCA sufentanil   | -                                    | -                   | 0.54 (0.09 to 3.35)                  | Low                 | 0.54 (0.09 to 3.35)                  | Low                 |
| IVPCA morphine vs. IVPCA tramadol     | -                                    | -                   | 0.64 (0.12 to 3.28)                  | Low                 | 0.64 (0.12 to 3.28)                  | Low                 |
| IVPCA morphine vs. PCEA buprenorphine | -                                    | -                   | 0.26 (0.03 to 2.04)                  | Moderate            | 0.26 (0.03 to 2.04)                  | Moderate            |
| IVPCA morphine vs. PCEA fentanyl      | 4.78 (1.24 to 18.49)                 | High                | 2.33 (0.37 to 14.29)                 | Moderate            | 3.71 (1.25 to 11.01)                 | High                |
| IVPCA morphine vs. PCEA meperidine    | -                                    | -                   | 5.18 (1.19 to 22.65)                 | Moderate            | 5.18 (1.19 to 22.65)                 | Moderate            |
| IVPCA morphine vs. PCEA               | -                                    | -                   | 2.62 (0.67 to 10.25)                 | Moderate            | 2.62 (0.67 to 10.25)                 | Moderate            |

|                                        |                      |      |                      |          |                      |          |
|----------------------------------------|----------------------|------|----------------------|----------|----------------------|----------|
| sufentanil                             |                      |      |                      |          |                      |          |
| IVPCA morphine vs. PCEA tramadol       | -                    | -    | 0.89 (0.12 to 6.80)  | Low      | 0.89 (0.12 to 6.80)  | Low      |
| IVPCA morphine vs. PCEA hydromorphone  | -                    | -    | 1.74 (0.15 to 19.49) | Very low | 1.74 (0.15 to 19.49) | Very low |
| IVPCA morphine vs. IVPCA hydromorphone | -                    | -    | 0.85 (0.15 to 4.77)  | Low      | 0.85 (0.15 to 4.77)  | Low      |
| IVPCA fentanyl vs. IVPCA meperidine    | -                    | -    | 2.08 (0.45 to 9.60)  | Low      | 2.08 (0.45 to 9.60)  | Low      |
| IVPCA fentanyl vs. IVPCA meptazinol    | -                    | -    | 0.34 (0.05 to 2.32)  | Moderate | 0.34 (0.05 to 2.32)  | Moderate |
| IVPCA fentanyl vs. IVPCA methadone     | -                    | -    | 1.53 (0.27 to 8.64)  | Low      | 1.53 (0.27 to 8.64)  | Low      |
| IVPCA fentanyl vs. IVPCA oxymorphone   | -                    | -    | 0.54 (0.10 to 2.96)  | Low      | 0.54 (0.10 to 2.96)  | Low      |
| IVPCA fentanyl vs. IVPCA sufentanil    | -                    | -    | 0.72 (0.19 to 2.78)  | Low      | 0.72 (0.19 to 2.78)  | Low      |
| IVPCA fentanyl vs. IVPCA tramadol      | 0.86 (0.30 to 2.50)  | Low  | -                    | -        | 0.86 (0.30 to 2.50)  | Low      |
| IVPCA fentanyl vs. PCEA buprenorphine  | -                    | -    | 0.35 (0.05 to 2.64)  | Moderate | 0.35 (0.05 to 2.64)  | Moderate |
| IVPCA fentanyl vs. PCEA fentanyl       | 4.02 (1.30 to 12.45) | High | 12.5 (1.28 to 100)   | Moderate | 5.01 (1.83 to 13.75) | High     |
| IVPCA fentanyl vs. PCEA meperidine     | -                    | -    | 7.01 (1.59 to 30.98) | Moderate | 7.01 (1.59 to 30.98) | Moderate |
| IVPCA fentanyl vs. PCEA sufentanil     | -                    | -    | 3.55 (0.97 to 13.02) | Moderate | 3.55 (0.97 to 13.02) | Moderate |
| IVPCA fentanyl vs. PCEA                | -                    | -    | 1.20 (0.16 to 8.82)  | Low      | 1.20 (0.16 to 8.82)  | Low      |



|                                         |                       |          |                      |          |                      |          |
|-----------------------------------------|-----------------------|----------|----------------------|----------|----------------------|----------|
| tramadol                                |                       |          |                      |          |                      |          |
| IVPCA fentanyl vs. PCEA hydromorphone   | -                     | -        | 2.35 (0.30 to 18.65) | Low      | 2.35 (0.30 to 18.65) | Low      |
| IVPCA fentanyl vs. IVPCA hydromorphone  | -                     | -        | 1.15 (0.35 to 3.78)  | Low      | 1.15 (0.35 to 3.78)  | Low      |
| IVPCA meperidine vs. IVPCA meptazinol   | -                     | -        | 0.16 (0.03 to 0.94)  | Moderate | 0.16 (0.03 to 0.94)  | Moderate |
| IVPCA meperidine vs. IVPCA methadone    | -                     | -        | 0.73 (0.16 to 3.42)  | Low      | 0.73 (0.16 to 3.42)  | Low      |
| IVPCA meperidine vs. IVPCA oxymorphone  | 0.25 (0.04 to 1.42)   | Moderate | 0.27 (0.04 to 1.97)  | Low      | 0.26 (0.07 to 0.96)  | High     |
| IVPCA meperidine vs. IVPCA sufentanil   | -                     | -        | 0.35 (0.05 to 2.66)  | Very low | 0.35 (0.05 to 2.66)  | Very low |
| IVPCA meperidine vs. IVPCA tramadol     | -                     | -        | 0.41 (0.06 to 2.67)  | Low      | 0.41 (0.06 to 2.67)  | Low      |
| IVPCA meperidine vs. PCEA buprenorphine | -                     | -        | 0.17 (0.02 to 1.57)  | Low      | 0.17 (0.02 to 1.57)  | Low      |
| IVPCA meperidine vs. PCEA fentanyl      | -                     | -        | 2.41 (0.60 to 9.60)  | Low      | 2.41 (0.60 to 9.60)  | Low      |
| IVPCA meperidine vs. PCEA meperidine    | 4.67 (0.21 to 111.11) | Low      | 2.94 (0.43 to 20)    | Low      | 3.37 (0.65 to 17.37) | Low      |
| IVPCA meperidine vs. PCEA sufentanil    | -                     | -        | 1.70 (0.34 to 8.51)  | Low      | 1.70 (0.34 to 8.51)  | Low      |
| IVPCA meperidine vs. PCEA tramadol      | -                     | -        | 0.58 (0.06 to 5.24)  | Very low | 0.58 (0.06 to 5.24)  | Very low |
| IVPCA meperidine vs. PCEA hydromorphone | -                     | -        | 1.13 (0.09 to 14.80) | Very low | 1.13 (0.09 to 14.80) | Very low |
| IVPCA meperidine vs. IVPCA              | -                     | -        | 0.55 (0.08 to 3.83)  | Very low | 0.55 (0.08 to 3.83)  | Very low |

|                                          |   |   |                        |          |                        |          |
|------------------------------------------|---|---|------------------------|----------|------------------------|----------|
| hydromorphone                            |   |   |                        |          |                        |          |
| IVPCA meptazinol vs. IVPCA methadone     | - | - | 4.52 (0.68 to 30.19)   | Low      | 4.52 (0.68 to 30.19)   | Low      |
| IVPCA meptazinol vs. IVPCA oxymorphone   | - | - | 1.60 (0.24 to 10.50)   | Low      | 1.60 (0.24 to 10.50)   | Low      |
| IVPCA meptazinol vs. IVPCA sufentanil    | - | - | 2.14 (0.20 to 22.42)   | Very low | 2.14 (0.20 to 22.42)   | Very low |
| IVPCA meptazinol vs. IVPCA tramadol      | - | - | 2.55 (0.28 to 23.03)   | Low      | 2.55 (0.28 to 23.03)   | Low      |
| IVPCA meptazinol vs. PCEA buprenorphine  | - | - | 1.03 (0.08 to 13.01)   | Moderate | 1.03 (0.08 to 13.01)   | Moderate |
| IVPCA meptazinol vs. PCEA fentanyl       | - | - | 14.83 (2.38 to 92.21)  | Moderate | 14.83 (2.38 to 92.21)  | Moderate |
| IVPCA meptazinol vs. PCEA meperidine     | - | - | 20.74 (2.59 to 166.12) | Low      | 20.74 (2.59 to 166.12) | Low      |
| IVPCA meptazinol vs. PCEA sufentanil     | - | - | 10.49 (1.41 to 77.80)  | Low      | 10.49 (1.41 to 77.80)  | Moderate |
| IVPCA meptazinol vs. PCEA tramadol       | - | - | 3.55 (0.29 to 43.69)   | Very low | 3.55 (0.29 to 43.69)   | Very low |
| IVPCA meptazinol vs. PCEA hydromorphone  | - | - | 6.94 (0.41 to 117.55)  | Very low | 6.94 (0.41 to 117.55)  | Very low |
| IVPCA meptazinol vs. IVPCA hydromorphone | - | - | 3.41 (0.36 to 32.76)   | Very low | 3.41 (0.36 to 32.76)   | Very low |
| IVPCA methadone vs. IVPCA oxymorphone    | - | - | 0.35 (0.07 to 1.90)    | Low      | 0.35 (0.07 to 1.90)    | Low      |
| IVPCA methadone vs. IVPCA sufentanil     | - | - | 0.47 (0.05 to 4.24)    | Very low | 0.47 (0.05 to 4.24)    | Very low |
| IVPCA methadone vs. IVPCA                | - | - | 0.56 (0.07 to 4.31)    | Low      | 0.56 (0.07 to 4.31)    | Low      |

|                                          |   |   |                       |          |                       |          |
|------------------------------------------|---|---|-----------------------|----------|-----------------------|----------|
| tramadol                                 |   |   |                       |          |                       |          |
| IVPCA methadone vs. PCEA buprenorphine   | - | - | 0.23 (0.02 to 2.49)   | Low      | 0.23 (0.02 to 2.49)   | Low      |
| IVPCA methadone vs. PCEA fentanyl        | - | - | 3.28 (0.65 to 16.60)  | Low      | 3.28 (0.65 to 16.60)  | Low      |
| IVPCA methadone vs. PCEA meperidine      | - | - | 4.58 (0.68 to 30.74)  | Low      | 4.58 (0.68 to 30.74)  | Low      |
| IVPCA methadone vs. PCEA sufentanil      | - | - | 2.32 (0.38 to 14.29)  | Low      | 2.32 (0.38 to 14.29)  | Low      |
| IVPCA methadone vs. PCEA tramadol        | - | - | 0.78 (0.07 to 8.35)   | Very low | 0.78 (0.07 to 8.35)   | Very low |
| IVPCA methadone vs. PCEA hydromorphone   | - | - | 1.53 (0.10 to 22.86)  | Very low | 1.53 (0.10 to 22.86)  | Very low |
| IVPCA methadone vs. IVPCA hydromorphone  | - | - | 0.75 (0.09 to 6.16)   | Very low | 0.75 (0.09 to 6.16)   | Very low |
| IVPCA oxymorphone vs. IVPCA sufentanil   | - | - | 1.34 (0.15 to 11.71)  | Very low | 1.34 (0.15 to 11.71)  | Very low |
| IVPCA oxymorphone vs. IVPCA tramadol     | - | - | 1.60 (0.22 to 11.87)  | Low      | 1.60 (0.22 to 11.87)  | Low      |
| IVPCA oxymorphone vs. PCEA buprenorphine | - | - | 0.64 (0.06 to 6.87)   | Low      | 0.64 (0.06 to 6.87)   | Low      |
| IVPCA oxymorphone vs. PCEA fentanyl      | - | - | 9.27 (1.90 to 45.21)  | Moderate | 9.27 (1.90 to 45.21)  | Moderate |
| IVPCA oxymorphone vs. PCEA meperidine    | - | - | 12.97 (2.04 to 82.65) | Moderate | 12.97 (2.04 to 82.65) | Moderate |
| IVPCA oxymorphone vs. PCEA sufentanil    | - | - | 6.56 (1.10 to 39.08)  | Moderate | 6.56 (1.10 to 39.08)  | Moderate |
| IVPCA oxymorphone vs. PCEA               | - | - | 2.22 (0.21 to 23.03)  | Very low | 2.22 (0.21 to 23.03)  | Very low |

|                                           |                     |          |                      |          |                      |          |
|-------------------------------------------|---------------------|----------|----------------------|----------|----------------------|----------|
| tramadol                                  |                     |          |                      |          |                      |          |
| IVPCA oxymorphone vs. PCEA hydromorphone  | -                   | -        | 4.34 (0.30 to 63.44) | Very low | 4.34 (0.30 to 63.44) | Very low |
| IVPCA oxymorphone vs. IVPCA hydromorphone | -                   | -        | 2.13 (0.27 to 16.99) | Very low | 2.13 (0.27 to 16.99) | Very low |
| IVPCA sufentanil vs. IVPCA tramadol       | 1.19 (0.52 to 2.73) | Moderate | -                    | -        | 1.19 (0.52 to 2.73)  | Moderate |
| IVPCA sufentanil vs. PCEA buprenorphine   | -                   | -        | 0.48 (0.04 to 5.48)  | Very low | 0.48 (0.04 to 5.48)  | Very low |
| IVPCA sufentanil vs. PCEA fentanyl        | -                   | -        | 6.93 (1.29 to 37.23) | Moderate | 6.93 (1.29 to 37.23) | Moderate |
| IVPCA sufentanil vs. PCEA meperidine      | -                   | -        | 9.69 (1.31 to 71.90) | Low      | 9.69 (1.31 to 71.90) | Low      |
| IVPCA sufentanil vs. PCEA sufentanil      | -                   | -        | 4.90 (0.75 to 31.84) | Very low | 4.90 (0.75 to 31.84) | Very low |
| IVPCA sufentanil vs. PCEA tramadol        | -                   | -        | 1.66 (0.15 to 18.39) | Very low | 1.66 (0.15 to 18.39) | Very low |
| IVPCA sufentanil vs. PCEA hydromorphone   | -                   | -        | 3.24 (0.46 to 23.08) | Low      | 3.24 (0.46 to 23.08) | Low      |
| IVPCA sufentanil vs. IVPCA hydromorphone  | -                   | -        | 1.59 (0.60 to 4.25)  | Moderate | 1.59 (0.60 to 4.25)  | Moderate |
| IVPCA tramadol vs. PCEA buprenorphine     | -                   | -        | 0.40 (0.04 to 3.98)  | Low      | 0.40 (0.04 to 3.98)  | Low      |
| IVPCA tramadol vs. PCEA fentanyl          | -                   | -        | 5.80 (1.34 to 25.11) | Moderate | 5.80 (1.34 to 25.11) | Moderate |
| IVPCA tramadol vs. PCEA meperidine        | -                   | -        | 8.12 (1.31 to 50.41) | Moderate | 8.12 (1.31 to 50.41) | Moderate |
| IVPCA tramadol vs. PCEA                   | -                   | -        | 4.11 (0.77 to 22.02) | Low      | 4.11 (0.77 to 22.02) | Low      |

|                                            |                       |          |                        |          |                        |          |
|--------------------------------------------|-----------------------|----------|------------------------|----------|------------------------|----------|
| sufentanil                                 |                       |          |                        |          |                        |          |
| IVPCA tramadol vs. PCEA tramadol           | -                     | -        | 1.39 (0.15 to 13.31)   | Very low | 1.39 (0.15 to 13.31)   | Very low |
| IVPCA tramadol vs. PCEA hydromorphone      | -                     | -        | 2.72 (0.46 to 16.12)   | Low      | 2.72 (0.46 to 16.12)   | Low      |
| IVPCA tramadol vs. IVPCA hydromorphone     | 1.33 (0.79 to 2.27)   | Moderate | -                      | -        | 1.34 (0.79 to 2.27)    | Moderate |
| PCEA buprenorphine vs. PCEA fentanyl       | 14.29 (2.48 to 83.33) | Moderate | -                      | -        | 14.39 (2.48 to 83.41)  | Moderate |
| PCEA buprenorphine vs. PCEA meperidine     | -                     | -        | 20.12 (2.50 to 162.13) | Low      | 20.12 (2.50 to 162.13) | Low      |
| PCEA buprenorphine vs. PCEA sufentanil     | -                     | -        | 10.18 (1.46 to 70.82)  | High     | 10.18 (1.46 to 70.82)  | High     |
| PCEA buprenorphine vs. PCEA tramadol       | -                     | -        | 3.44 (0.29 to 40.30)   | Low      | 3.44 (0.29 to 40.30)   | Low      |
| PCEA buprenorphine vs. PCEA hydromorphone  | -                     | -        | 6.74 (0.37 to 122.29)  | Very low | 6.74 (0.37 to 122.29)  | Very low |
| PCEA buprenorphine vs. IVPCA hydromorphone | -                     | -        | 3.31 (0.32 to 34.66)   | Very low | 3.31 (0.32 to 34.66)   | Very low |
| PCEA fentanyl vs. PCEA meperidine          | 1.33 (0.41 to 4.39)   | Low      | 2.1 (0.07 to 67.58)    | Low      | 1.40 (0.45 to 4.31)    | Low      |
| PCEA fentanyl vs. PCEA sufentanil          | 0.71 (0.31 to 1.61)   | Moderate | -                      | -        | 0.71 (0.31 to 1.61)    | Moderate |
| PCEA fentanyl vs. PCEA tramadol            | -                     | -        | 0.24 (0.04 to 1.34)    | Low      | 0.24 (0.04 to 1.34)    | Low      |
| PCEA fentanyl vs. PCEA hydromorphone       | -                     | -        | 0.47 (0.05 to 4.70)    | Very low | 0.47 (0.05 to 4.70)    | Very low |
| PCEA fentanyl vs. IVPCA                    | -                     | -        | 0.23 (0.05 to 1.09)    | Low      | 0.23 (0.05 to 1.09)    | Low      |

|                                            |                     |     |                      |          |                      |          |
|--------------------------------------------|---------------------|-----|----------------------|----------|----------------------|----------|
| hydromorphone                              |                     |     |                      |          |                      |          |
| PCEA meperidine vs. PCEA sufentanil        | -                   | -   | 0.51 (0.13 to 2.04)  | Low      | 0.51 (0.13 to 2.04)  | Low      |
| PCEA meperidine vs. PCEA tramadol          | -                   | -   | 0.17 (0.02 to 1.34)  | Low      | 0.17 (0.02 to 1.34)  | Low      |
| PCEA meperidine vs. PCEA hydromorphone     | -                   | -   | 0.33 (0.03 to 4.29)  | Very low | 0.33 (0.03 to 4.29)  | Very low |
| PCEA meperidine vs. IVPCA hydromorphone    | -                   | -   | 0.16 (0.02 to 1.10)  | Very low | 0.16 (0.02 to 1.10)  | Very low |
| PCEA sufentanil vs. PCEA tramadol          | 0.34 (0.07 to 1.54) | Low | -                    | -        | 0.34 (0.07 to 1.54)  | Low      |
| PCEA sufentanil vs. PCEA hydromorphone     | -                   | -   | 0.66 (0.06 to 7.65)  | Very low | 0.66 (0.06 to 7.65)  | Very low |
| PCEA sufentanil vs. IVPCA hydromorphone    | -                   | -   | 0.33 (0.06 to 1.89)  | Very low | 0.33 (0.06 to 1.89)  | Very low |
| PCEA tramadol vs. PCEA hydromorphone       | -                   | -   | 1.96 (0.11 to 34.73) | Very low | 1.96 (0.11 to 34.73) | Very low |
| PCEA tramadol vs. IVPCA hydromorphone      | -                   | -   | 0.96 (0.09 to 9.79)  | Very low | 0.96 (0.09 to 9.79)  | Very low |
| PCEA hydromorphone vs. IVPCA hydromorphone | 0.49 (0.09 to 2.69) | Low | -                    | -        | 0.49 (0.09 to 2.69)  | Low      |

IVPCA: intravenous patient-controlled analgesia; PCEA: patient-controlled epidural analgesia

#### F. Pruritus

| Comparison               | Direct evidence                      |                     | Indirect evidence                    |                     | Network evidence                     |                     |
|--------------------------|--------------------------------------|---------------------|--------------------------------------|---------------------|--------------------------------------|---------------------|
|                          | Odds ratio (95% confidence interval) | Quality of evidence | Odds ratio (95% confidence interval) | Quality of evidence | Odds ratio (95% confidence interval) | Quality of evidence |
| IVPCA morphine vs. IVPCA | 3.00 (0.11 to 76.92)                 | Moderate            | 1.62 (0.34 to 7.84)                  | Low                 | 1.81 (0.45 to 7.28)                  | Moderate            |

|                                       |                      |          |                       |          |                       |          |
|---------------------------------------|----------------------|----------|-----------------------|----------|-----------------------|----------|
| fentanyl                              |                      |          |                       |          |                       |          |
| IVPCA morphine vs. IVPCA meperidine   | 3.68 (1.06 to 12.66) | Moderate | 3.36 (0.29 to 38.39)  | Low      | 3.58 (1.09 to 11.69)  | Moderate |
| IVPCA morphine vs. IVPCA methadone    | 8.00 (1.04 to 62.50) | Moderate | -                     | -        | 8.03 (0.87 to 74.43)  | Low      |
| IVPCA morphine vs. IVPCA oxymorphone  | 2.56 (0.53 to 12.35) | Low      | 1.1 (0.005 to 259.34) | Low      | 2.42 (0.45 to 12.98)  | Low      |
| IVPCA morphine vs. PCEA buprenorphine | -                    | -        | 2.00 (0.43 to 9.39)   | Moderate | 2.00 (0.43 to 9.39)   | Moderate |
| IVPCA morphine vs. PCEA fentanyl      | 0.96 (0.38 to 2.43)  | Moderate | 0.24 (0.06 to 0.97)   | Low      | 0.56 (0.21 to 1.51)   | Moderate |
| IVPCA morphine vs. PCEA meperidine    | -                    | -        | 1.06 (0.26 to 4.23)   | Low      | 1.06 (0.26 to 4.23)   | Low      |
| IVPCA morphine vs. PCEA sufentanil    | 0.11 (0.02 to 0.60)  | Low      | 1.35 (0.43 to 4.23)   | Moderate | 0.47 (0.12 to 1.82)   | Low      |
| IVPCA morphine vs. PCEA tramadol      | -                    | -        | 8.34 (0.29 to 241.11) | Low      | 8.34 (0.29 to 241.11) | Low      |
| IVPCA fentanyl vs. IVPCA meperidine   | -                    | -        | 1.98 (0.37 to 10.72)  | Low      | 1.98 (0.37 to 10.72)  | Low      |
| IVPCA fentanyl vs. IVPCA methadone    | -                    | -        | 4.44 (0.32 to 61.47)  | Low      | 4.44 (0.32 to 61.47)  | Low      |
| IVPCA fentanyl vs. IVPCA oxymorphone  | -                    | -        | 1.34 (0.16 to 11.62)  | Low      | 1.34 (0.16 to 11.62)  | Low      |
| IVPCA fentanyl vs. PCEA buprenorphine | -                    | -        | 1.11 (0.22 to 5.54)   | Low      | 1.11 (0.22 to 5.54)   | Low      |
| IVPCA fentanyl vs. PCEA fentanyl      | 0.32 (0.08 to 1.23)  | Low      | 0.18 (0 to 6.23)      | Moderate | 0.31 (0.10 to 0.92)   | High     |
| IVPCA fentanyl vs. PCEA               | -                    | -        | 0.59 (0.11 to 3.10)   | Low      | 0.59 (0.11 to 3.10)   | Low      |

|                                         |                     |          |                       |          |                       |          |
|-----------------------------------------|---------------------|----------|-----------------------|----------|-----------------------|----------|
| meperidine                              |                     |          |                       |          |                       |          |
| IVPCA fentanyl vs. PCEA sufentanil      | -                   | -        | 0.26 (0.05 to 1.28)   | Low      | 0.26 (0.05 to 1.28)   | Low      |
| IVPCA fentanyl vs. PCEA tramadol        | -                   | -        | 4.62 (0.14 to 147.73) | Low      | 4.62 (0.14 to 147.73) | Low      |
| IVPCA meperidine vs. IVPCA methadone    | -                   | -        | 2.24 (0.18 to 27.95)  | Low      | 2.24 (0.18 to 27.95)  | Low      |
| IVPCA meperidine vs. IVPCA oxymorphone  | 0.50 (0.04 to 5.88) | Moderate | 1.03 (0.04 to 24.64)  | Low      | 0.68 (0.10 to 4.59)   | Moderate |
| IVPCA meperidine vs. PCEA buprenorphine | -                   | -        | 0.56 (0.09 to 3.38)   | Low      | 0.56 (0.09 to 3.38)   | Low      |
| IVPCA meperidine vs. PCEA fentanyl      | -                   | -        | 0.16 (0.04 to 0.60)   | Moderate | 0.16 (0.04 to 0.60)   | Moderate |
| IVPCA meperidine vs. PCEA meperidine    | 0.31 (0.09 to 1.13) | Low      | 0.26 (0.02 to 3.06)   | Low      | 0.30 (0.08 to 1.04)   | Low      |
| IVPCA meperidine vs. PCEA sufentanil    | -                   | -        | 0.13 (0.02 to 0.71)   | Moderate | 0.13 (0.02 to 0.71)   | Moderate |
| IVPCA meperidine vs. PCEA tramadol      | -                   | -        | 2.33 (0.07 to 77.90)  | Low      | 2.33 (0.07 to 77.90)  | Low      |
| IVPCA methadone vs. IVPCA oxymorphone   | -                   | -        | 0.30 (0.02 to 4.91)   | Low      | 0.30 (0.02 to 4.91)   | Low      |
| IVPCA methadone vs. PCEA buprenorphine  | -                   | -        | 0.25 (0.02 to 3.75)   | Low      | 0.25 (0.02 to 3.75)   | Low      |
| IVPCA methadone vs. PCEA fentanyl       | -                   | -        | 0.07 (0.01 to 0.79)   | Moderate | 0.07 (0.01 to 0.79)   | Moderate |
| IVPCA methadone vs. PCEA meperidine     | -                   | -        | 0.13 (0.01 to 1.82)   | Low      | 0.13 (0.01 to 1.82)   | Low      |
| IVPCA methadone vs. PCEA                | -                   | -        | 0.06 (0.00 to 0.79)   | Moderate | 0.06 (0.00 to 0.79)   | Moderate |



|                                          |                     |          |                        |          |                        |          |
|------------------------------------------|---------------------|----------|------------------------|----------|------------------------|----------|
| sufentanil                               |                     |          |                        |          |                        |          |
| IVPCA methadone vs. PCEA tramadol        | -                   | -        | 1.04 (0.02 to 58.72)   | Low      | 1.04 (0.02 to 58.72)   | Low      |
| IVPCA oxymorphone vs. PCEA buprenorphine | -                   | -        | 0.82 (0.09 to 7.89)    | Low      | 0.82 (0.09 to 7.89)    | Low      |
| IVPCA oxymorphone vs. PCEA fentanyl      | -                   | -        | 0.23 (0.03 to 1.57)    | Low      | 0.23 (0.03 to 1.57)    | Low      |
| IVPCA oxymorphone vs. PCEA meperidine    | -                   | -        | 0.44 (0.05 to 3.55)    | Low      | 0.44 (0.05 to 3.55)    | Low      |
| IVPCA oxymorphone vs. PCEA sufentanil    | -                   | -        | 0.19 (0.02 to 1.65)    | Low      | 0.19 (0.02 to 1.65)    | Low      |
| IVPCA oxymorphone vs. PCEA tramadol      | -                   | -        | 3.44 (0.08 to 146.09)  | Low      | 3.44 (0.08 to 146.09)  | Low      |
| PCEA buprenorphine vs. PCEA fentanyl     | 0.27 (0.10 to 0.71) | High     | -                      | -        | 0.28 (0.09 to 0.90)    | High     |
| PCEA buprenorphine vs. PCEA meperidine   | -                   | -        | 0.53 (0.09 to 3.05)    | Low      | 0.53 (0.09 to 3.05)    | Low      |
| PCEA buprenorphine vs. PCEA sufentanil   | -                   | -        | 0.24 (0.05 to 1.18)    | Moderate | 0.24 (0.05 to 1.18)    | Moderate |
| PCEA buprenorphine vs. PCEA tramadol     | -                   | -        | 4.17 (0.13 to 134.80)  | Low      | 4.17 (0.13 to 134.80)  | Low      |
| PCEA fentanyl vs. PCEA meperidine        | 1.8 (0.49 to 6.58)  | Low      | 2.18 (0.2 to 24.12)    | Low      | 1.90 (0.52 to 6.96)    | Low      |
| PCEA fentanyl vs. PCEA sufentanil        | 1.48 (0.68 to 3.25) | Moderate | 0.12 (0.02 to 0.8)     | Moderate | 0.85 (0.27 to 2.61)    | Low      |
| PCEA fentanyl vs. PCEA tramadol          | -                   | -        | 15.00 (0.57 to 397.74) | Low      | 15.00 (0.57 to 397.74) | Low      |
| PCEA meperidine vs. PCEA                 | -                   | -        | 0.44 (0.08 to 2.37)    | Low      | 0.44 (0.08 to 2.37)    | Low      |

|                                   |                        |     |                       |     |                        |     |
|-----------------------------------|------------------------|-----|-----------------------|-----|------------------------|-----|
| sufentanil                        |                        |     |                       |     |                        |     |
| PCEA meperidine vs. PCEA tramadol | -                      | -   | 7.88 (0.24 to 261.96) | Low | 7.88 (0.24 to 261.96)  | Low |
| PCEA sufentanil vs. PCEA tramadol | 17.86 (0.93 to 333.33) | Low | -                     | -   | 17.73 (0.82 to 385.32) | Low |

IVPCA: intravenous patient-controlled analgesia; PCEA: patient-controlled epidural analgesia

#### G. Sedation/drowsiness

|                                       | Direct evidence                      |                     | Indirect evidence                    |                     | Network evidence                     |                     |
|---------------------------------------|--------------------------------------|---------------------|--------------------------------------|---------------------|--------------------------------------|---------------------|
|                                       | Odds ratio (95% confidence interval) | Quality of evidence | Odds ratio (95% confidence interval) | Quality of evidence | Odds ratio (95% confidence interval) | Quality of evidence |
| IVPCA morphine vs. IVPCA fentanyl     | -                                    | -                   | 0.59 (0.09 to 4.11)                  | Low                 | 0.59 (0.09 to 4.11)                  | Low                 |
| IVPCA morphine vs. IVPCA meperidine   | 1.24 (0.58 to 2.67)                  | Low                 | 1.18 (0.26 to 5.35)                  | Moderate            | 1.11 (0.56 to 2.24)                  | Moderate            |
| IVPCA morphine vs. IVPCA meptazinol   | 5.68 (0.26 to 125)                   | Moderate            | -                                    | -                   | 5.70 (0.26 to 125.36)                | Moderate            |
| IVPCA morphine vs. IVPCA methadone    | 0.82 (0.53 to 1.26)                  | Low                 | -                                    | -                   | 0.82 (0.53 to 1.26)                  | Low                 |
| IVPCA morphine vs. IVPCA oxymorphone  | 2.26 (1.02 to 5.03)                  | High                | 0.29 (0.02 to 5.4)                   | Low                 | 2.26 (1.02 to 5.03)                  | High                |
| IVPCA morphine vs. PCEA buprenorphine | -                                    | -                   | 3.82 (1.17 to 12.45)                 | Moderate            | 3.82 (1.17 to 12.45)                 | Moderate            |
| IVPCA morphine vs. PCEA fentanyl      | 4.81 (1.80 to 12.82)                 | Moderate            | 4.22 (1.53 to 11.66)                 | High                | 4.51 (2.23 to 9.14)                  | High                |
| IVPCA morphine vs. PCEA meperidine    | -                                    | -                   | 6.66 (2.64 to 16.82)                 | Moderate            | 6.66 (2.64 to 16.82)                 | Moderate            |
| IVPCA morphine vs. PCEA               | 2.11 (0.66 to 6.80)                  | Moderate            | 3.77 (1.41 to 10.07)                 | Moderate            | 2.96 (1.40 to 6.29)                  | High                |

|                                        |                      |          |                       |          |                       |          |
|----------------------------------------|----------------------|----------|-----------------------|----------|-----------------------|----------|
| sufentanil                             |                      |          |                       |          |                       |          |
| IVPCA morphine vs. PCEA tramadol       | -                    | -        | 2.96 (0.16 to 55.78)  | Low      | 2.96 (0.16 to 55.78)  | Low      |
| IVPCA fentanyl vs. IVPCA meperidine    | -                    | -        | 1.88 (0.25 to 14.06)  | Low      | 1.88 (0.25 to 14.06)  | Low      |
| IVPCA fentanyl vs. IVPCA meptazinol    | -                    | -        | 9.64 (0.25 to 370.36) | Low      | 9.64 (0.25 to 370.36) | Low      |
| IVPCA fentanyl vs. IVPCA methadone     | -                    | -        | 1.38 (0.19 to 10.07)  | Low      | 1.38 (0.19 to 10.07)  | Low      |
| IVPCA fentanyl vs. IVPCA oxymorphone   | -                    | -        | 3.83 (0.47 to 31.16)  | Low      | 3.83 (0.47 to 31.16)  | Low      |
| IVPCA fentanyl vs. PCEA buprenorphine  | -                    | -        | 6.45 (0.84 to 49.66)  | Moderate | 6.45 (0.84 to 49.66)  | Moderate |
| IVPCA fentanyl vs. PCEA fentanyl       | 7.63 (1.25 to 45.45) | High     | -                     | -        | 7.63 (1.25 to 46.48)  | High     |
| IVPCA fentanyl vs. PCEA meperidine     | -                    | -        | 11.27 (1.52 to 83.55) | High     | 11.27 (1.52 to 83.55) | High     |
| IVPCA fentanyl vs. PCEA sufentanil     | -                    | -        | 5.01 (0.77 to 32.43)  | Moderate | 5.01 (0.77 to 32.43)  | Moderate |
| IVPCA fentanyl vs. PCEA tramadol       | -                    | -        | 5.01 (0.17 to 149.61) | Low      | 5.01 (0.17 to 149.61) | Low      |
| IVPCA meperidine vs. IVPCA meptazinol  | -                    | -        | 5.12 (0.22 to 121.62) | Low      | 5.12 (0.22 to 121.62) | Low      |
| IVPCA meperidine vs. IVPCA methadone   | -                    | -        | 0.73 (0.32 to 1.67)   | Low      | 0.73 (0.32 to 1.67)   | Low      |
| IVPCA meperidine vs. IVPCA oxymorphone | 0.77 (0.18 to 3.23)  | Moderate | 6.55 (1.35 to 31.65)  | Moderate | 2.03 (0.70 to 5.87)   | Low      |
| IVPCA meperidine vs. PCEA              | -                    | -        | 3.43 (0.94 to 12.51)  | Low      | 3.43 (0.94 to 12.51)  | Low      |

|                                         |                      |          |                      |          |                      |          |
|-----------------------------------------|----------------------|----------|----------------------|----------|----------------------|----------|
| buprenorphine                           |                      |          |                      |          |                      |          |
| IVPCA meperidine vs. PCEA fentanyl      | -                    | -        | 4.05 (1.68 to 9.78)  | Moderate | 4.05 (1.68 to 9.78)  | Moderate |
| IVPCA meperidine vs. PCEA meperidine    | 7.35 (2.54 to 21.28) | Moderate | 3.93 (0.86 to 17.87) | Low      | 5.98 (2.51 to 14.29) | Moderate |
| IVPCA meperidine vs. PCEA sufentanil    | -                    | -        | 2.66 (1.04 to 6.79)  | Moderate | 2.66 (1.04 to 6.79)  | Moderate |
| IVPCA meperidine vs. PCEA tramadol      | -                    | -        | 2.66 (0.13 to 52.78) | Low      | 2.66 (0.13 to 52.78) | Low      |
| IVPCA meptazinol vs. IVPCA methadone    | -                    | -        | 0.14 (0.01 to 3.25)  | Low      | 0.14 (0.01 to 3.25)  | Low      |
| IVPCA meptazinol vs. IVPCA oxymorphone  | -                    | -        | 0.40 (0.02 to 9.67)  | Low      | 0.40 (0.02 to 9.67)  | Low      |
| IVPCA meptazinol vs. PCEA buprenorphine | -                    | -        | 0.67 (0.02 to 18.33) | Low      | 0.67 (0.02 to 18.33) | Low      |
| IVPCA meptazinol vs. PCEA fentanyl      | -                    | -        | 0.79 (0.03 to 18.87) | Low      | 0.79 (0.03 to 18.87) | Low      |
| IVPCA meptazinol vs. PCEA meperidine    | -                    | -        | 1.17 (0.05 to 29.47) | Low      | 1.17 (0.05 to 29.47) | Low      |
| IVPCA meptazinol vs. PCEA sufentanil    | -                    | -        | 0.52 (0.02 to 12.52) | Moderate | 0.52 (0.02 to 12.52) | Moderate |
| IVPCA meptazinol vs. PCEA tramadol      | -                    | -        | 0.52 (0.01 to 36.92) | Low      | 0.52 (0.01 to 36.92) | Low      |
| IVPCA methadone vs. IVPCA oxymorphone   | -                    | -        | 2.77 (1.11 to 6.89)  | Moderate | 2.77 (1.11 to 6.89)  | Moderate |
| IVPCA methadone vs. PCEA buprenorphine  | -                    | -        | 4.68 (1.33 to 16.49) | Moderate | 4.68 (1.33 to 16.49) | Moderate |
| IVPCA methadone vs. PCEA                | -                    | -        | 5.53 (2.42 to 12.67) | Moderate | 5.53 (2.42 to 12.67) | Moderate |

|                                          |                     |          |                      |          |                      |          |
|------------------------------------------|---------------------|----------|----------------------|----------|----------------------|----------|
| fentanyl                                 |                     |          |                      |          |                      |          |
| IVPCA methadone vs. PCEA meperidine      | -                   | -        | 8.17 (2.94 to 22.72) | Moderate | 8.17 (2.94 to 22.72) | Moderate |
| IVPCA methadone vs. PCEA sufentanil      | -                   | -        | 3.63 (1.52 to 8.67)  | Moderate | 3.63 (1.52 to 8.67)  | Moderate |
| IVPCA methadone vs. PCEA tramadol        | -                   | -        | 3.63 (0.19 to 70.59) | Low      | 3.63 (0.19 to 70.59) | Low      |
| IVPCA oxymorphone vs. PCEA buprenorphine | -                   | -        | 1.69 (0.40 to 7.03)  | Low      | 1.69 (0.40 to 7.03)  | Low      |
| IVPCA oxymorphone vs. PCEA fentanyl      | -                   | -        | 2.00 (0.69 to 5.80)  | Low      | 2.00 (0.69 to 5.80)  | Low      |
| IVPCA oxymorphone vs. PCEA meperidine    | -                   | -        | 2.95 (0.87 to 10.02) | Low      | 2.95 (0.87 to 10.02) | Low      |
| IVPCA oxymorphone vs. PCEA sufentanil    | -                   | -        | 1.31 (0.44 to 3.93)  | Moderate | 1.31 (0.44 to 3.93)  | Moderate |
| IVPCA oxymorphone vs. PCEA tramadol      | -                   | -        | 1.31 (0.06 to 27.45) | Low      | 1.31 (0.06 to 27.45) | Low      |
| PCEA buprenorphine vs. PCEA fentanyl     | 1.18 (0.46 to 3.06) | Moderate | -                    | -        | 1.18 (0.46 to 3.06)  | Moderate |
| PCEA buprenorphine vs. PCEA meperidine   | -                   | -        | 1.75 (0.48 to 6.31)  | Moderate | 1.75 (0.48 to 6.31)  | Moderate |
| PCEA buprenorphine vs. PCEA sufentanil   | -                   | -        | 0.78 (0.27 to 2.24)  | Moderate | 0.78 (0.27 to 2.24)  | Moderate |
| PCEA buprenorphine vs. PCEA tramadol     | -                   | -        | 0.78 (0.04 to 16.05) | Low      | 0.78 (0.04 to 16.05) | Low      |
| PCEA fentanyl vs. PCEA meperidine        | 1.20 (0.42 to 3.45) | Moderate | 2.26 (0.49 to 10.35) | Low      | 1.48 (0.62 to 3.51)  | Moderate |
| PCEA fentanyl vs. PCEA                   | 0.70 (0.42 to 1.15) | Moderate | 0.39 (0.09 to 1.66)  | Low      | 0.66 (0.41 to 1.05)  | Moderate |

|                                     |                      |     |                      |          |                      |          |
|-------------------------------------|----------------------|-----|----------------------|----------|----------------------|----------|
| sufentanil                          |                      |     |                      |          |                      |          |
| PCEA fentanyl vs. PCEA tramadol     | -                    | -   | 0.66 (0.04 to 11.65) | Low      | 0.66 (0.04 to 11.65) | Low      |
| PCEA meperidine vs. PCEA sufentanil | -                    | -   | 0.44 (0.17 to 1.16)  | Moderate | 0.44 (0.17 to 1.16)  | Moderate |
| PCEA meperidine vs. PCEA tramadol   | -                    | -   | 0.44 (0.02 to 8.87)  | Low      | 0.44 (0.02 to 8.87)  | Low      |
| PCEA sufentanil vs. PCEA tramadol   | 1.00 (0.06 to 16.95) | Low | -                    | -        | 1.00 (0.06 to 17.07) | Low      |

IVPCA: intravenous patient-controlled analgesia; PCEA: patient-controlled epidural analgesia

## References

1. Wu Z, Zhao P, Peng J, Fang L, Ding J, Yan G, et al. A Patient-Controlled Intravenous Analgesia With Tramadol Ameliorates Postpartum Depression in High-Risk Woman After Cesarean Section: A Randomized Controlled Trial. *Front Med (Lausanne)* 2021; **8**: 679159.
2. Chi X, Li M, Mei W, Liao M. Comparison of patient-controlled intravenous analgesia with sufentanil versus tramadol in post-cesarean section pain management and lactation after general anesthesia - a prospective, randomized, double-blind, controlled study. *J Pain Res* 2017; **10**: 1521-1527.
3. Ebneshahidi A, Akbari M, Heshmati B. Patient-controlled versus nurse-controlled post-operative analgesia after caesarean section. *Adv Biomed Res* 2012; **1**: 6.
4. Saracoglu A, Saracoglu KT, Umuroglu T, But A. The effectivity of fentanyl versus tramadol as intravenous patient-controlled analgesia after cesarean section. *Adv Clin Exp Med* 2010; **19**: 739-743.
5. Cohen S, Pantuck CB, Amar D, Burley E, Pantuck EJ. The primary action of epidural fentanyl after cesarean delivery is via a spinal mechanism. *Anesth Analg* 2002; **94**: 674-679.
6. Cooper DW, Saleh U, Taylor M, Whyte S, Ryall D, Kokri MS, et al. Patient-controlled analgesia: epidural fentanyl and i.v. morphine compared after caesarean section. *Br J Anaesth* 1999; **82**: 366-370.
7. Kim CJ, Chea JS, Chung MY, Lee BH, Yoon JW. The Analgesic and Hemostatic Effects of Diclofenac as Adjuvant of Intravenous Opioid Using PCA after Cesarean Section. *Korean J Anesthesiol* 1999; **36**: 256-262.
8. Vercauteren MP, Mertens E, Schols G, Van Mol I, Adriaensen HA. Patient-controlled extradural analgesia after caesarean section: a comparison between tramadol, sufentanil and a mixture of both. *Eur J Pain* 1999; **3**: 205-210.
9. James KS, Davidson IT, McGrady E. Patient-controlled analgesia following caesarean section: a comparison of morphine and meptazinol. *Int J Obstet Anesth* 1997; **6**: 93-96.
10. Lee BH, Lim YG, Chea JS, Kim CJ, Chung MY, Jung JY. Morphine and Meperidine Analgesic Effect Using Intravenous PCA of Intramuscular Diclofenac after Cesarean Section. *Korean J Anesthesiol* 1997; **33**: 510-516.
11. Ngan Kee WD, Lam KK, Chen PP, Gin T. Comparison of patient-controlled epidural analgesia with patient-controlled intravenous analgesia using pethidine or fentanyl. *Anaesth Intensive Care* 1997; **25**: 126-132.
12. Goh JL, Evans SF, Pavy TJ. Patient-controlled epidural analgesia following caesarean delivery: a comparison of pethidine and fentanyl. *Anaesth Intensive Care* 1996; **24**: 45-50.
13. Cooper DW, Ryall DM, Desira WR. Extradural fentanyl for postoperative analgesia: predominant spinal or systemic action? *Br J Anaesth* 1995; **74**: 184-187.
14. Howell PR, Gambling DR, Pavy T, McMorland G, Douglas MJ. Patient-controlled analgesia following caesarean section under general anaesthesia: a comparison of fentanyl with morphine. *Can J Anaesth* 1995; **42**: 41-45.
15. Lee BH, Chea JS, Chung MY, Byun HJ. A Comparative Effect of Meperidine between Intravenous and Epidural Patient-Controlled Analgesia for the Postoperative Pain Relief after Cesarean Section. *Korean J Pain* 1995; **8**: 257-265.
16. Grass JA, Zuckerman RL, Sakima NT, Harris AP. Patient-controlled analgesia after cesarean delivery: epidural sufentanil versus intravenous morphine. *Reg Anesth Pain Med* 1994; **19**: 90-97.
17. Paech MJ, Moore JS, Evans SF. Meperidine for patient-controlled analgesia after cesarean section.

Intravenous versus epidural administration. *Anesthesiology* 1994; **80**: 1268-1276.

18. Cohen S, Amar D, Pantuck CB, Pantuck EJ, Goodman EJ, Widroff JS, et al. Postcesarean delivery epidural patient-controlled analgesia. Fentanyl or sufentanil? *Anesthesiology* 1993; **78**: 486-491.
19. Cohen S, Amar D, Pantuck CB, Pantuck EJ, Weissman AM, Landa S, et al. Epidural patient-controlled analgesia after cesarean section: buprenorphine-0.015% bupivacaine with epinephrine versus fentanyl-0.015% bupivacaine with and without epinephrine. *Anesth Analg* 1992; **74**: 226-230.
20. Cohen S, Amar D, Pantuck CB, Pantuck EJ, Weissman AB. Adverse effects of epidural 0.03% bupivacaine during analgesia after cesarean section. *Anesth Analg* 1992; **75**: 753-756.
21. Parker RK, White PF. Epidural patient-controlled analgesia: an alternative to intravenous patient-controlled analgesia for pain relief after cesarean delivery. *Anesthesia and analgesia* 1992; **75**: 245-251.
22. Sinatra RS, Lodge K, Sibert K, Chung KS, Chung JH, Parker A, et al. A comparison of morphine, meperidine, and oxymorphone as utilized in patient-controlled analgesia following cesarean delivery. *Anesthesiology* 1989; **70**: 585-590.
23. Sinatra R, Chung KS, Silverman DG, Brull SJ, Chung J, Harrison DM, et al. An evaluation of morphine and oxymorphone administered via patient-controlled analgesia (PCA) or PCA plus basal infusion in postcesarean-delivery patients. *Anesthesiology* 1989; **71**: 502-507.
